# Supplementary material for: The shared genetic landscape of blood cell traits and risk of neurological and psychiatric disorders
Source: PubMed Central journal article supplement — Cell Genom. 2023 Jan 25;3(2):100249. doi: 10.1016/j.xgen.2022.100249 (PMC9932996; doi:10.1016/j.xgen.2022.100249), 2023-01-25
Supplement: mmc1.pdf [file mmc1.pdf]

**Cell Genomics, Volume 3**

**Supplemental information**

**The shared genetic landscape  
of blood cell traits and risk  
of neurological and psychiatric disorders**

**Yuanhao Yang, Yuan Zhou, Dale R. Nyholt, Chloe X. Yap, Rudolph K. Tannenberg, Ying Wang, Yang Wu, Zhihong Zhu, Bruce V. Taylor, and Jacob Gratten**

## Supplemental Figures

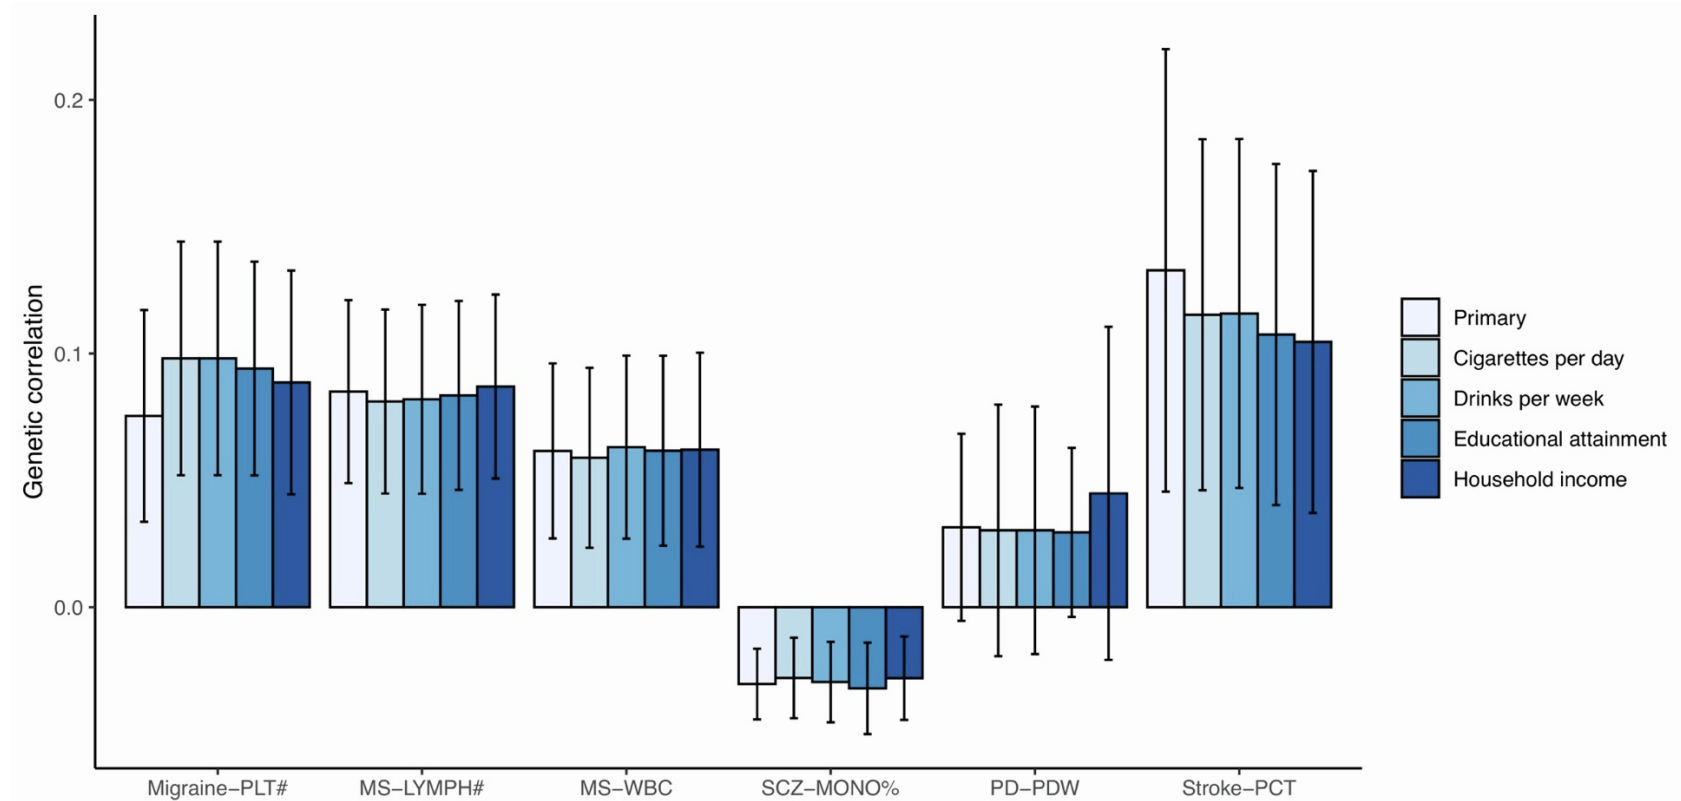

**Figure S1.** Summary of genetic correlations for specific BCT–NPD pairs estimated by primary HDL and HDL after conditioning GWAS summary data of specific BCTs and NPDs on the GWAS of cigarettes per day, drinks per week, educational attainment, and household income, respectively; related to Figure 2 and STAR Methods. BCT–NPD pairs were included if they had a Bonferroni- or FDR-significant genetic correlation (i.e., MS and LYMPH#, MS and WBC, SCZ and MONO%, migraine and PLT#) or a putative causal relationship (i.e., stroke and PCT, PD and PDW). Error bars represent the 95% CIs for the estimated genetic correlations.

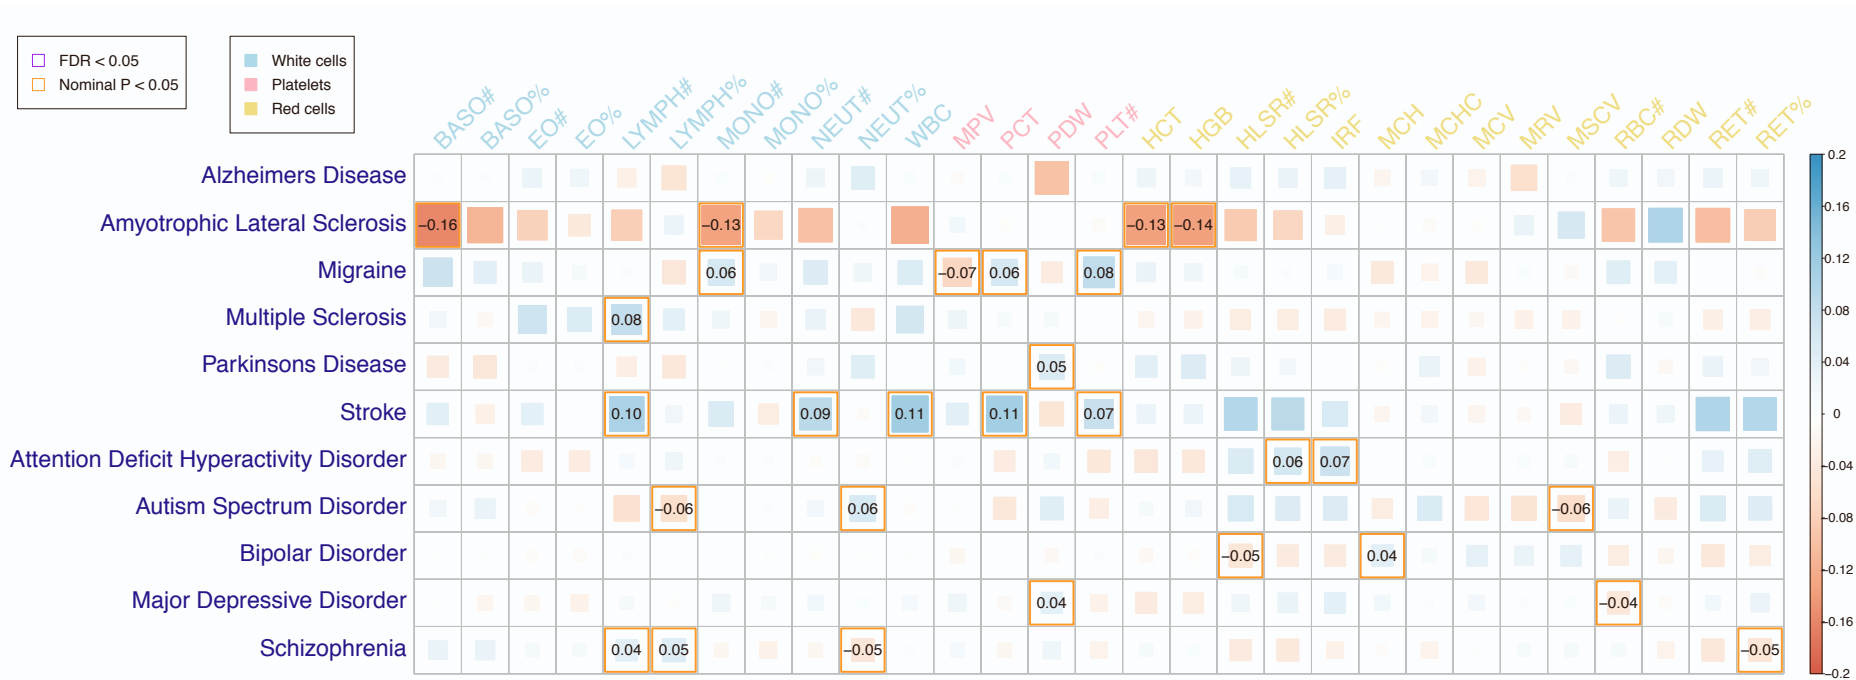

**Figure S2.** Estimated genetic correlations between BCTs and NPDs using the LDSC model, related to Figure 2 and STAR Methods. Significant genetic correlations (with estimates provided) are highlighted by red, purple, or orange boxes if they were Bonferroni-significant, FDR-significant, or nominally significant, respectively.

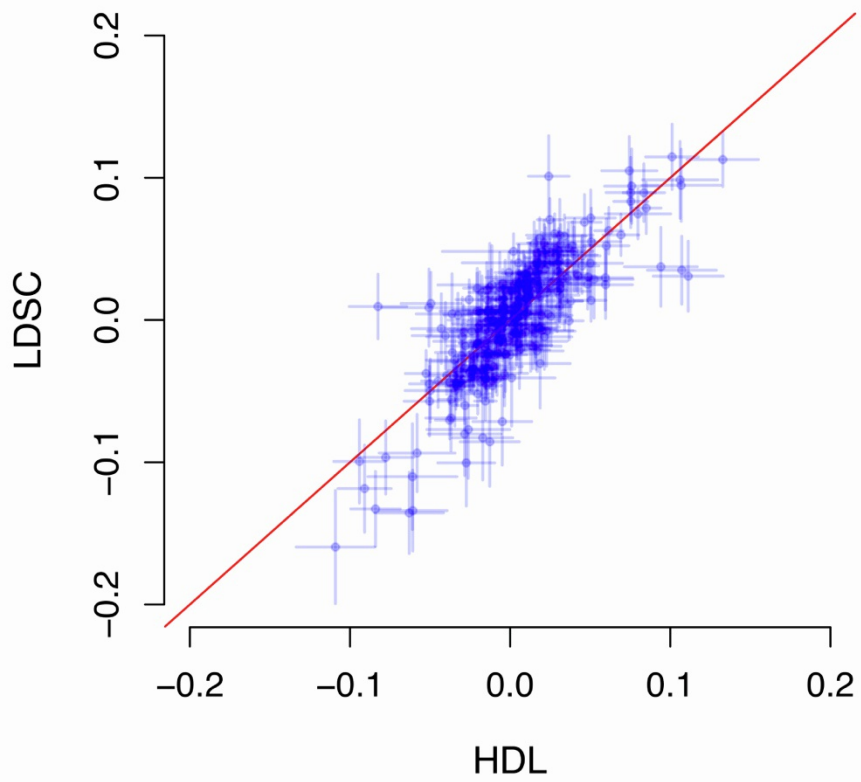

**Figure S3.** Comparison of genetic correlations estimated by HDL and LDSC, related to Figure 2 and STAR Methods. The estimated correlation = 0.81 (95% CI = 0.76-0.84) between genetic correlations for BCT–NPD pairs estimated by HDL and LDSC.

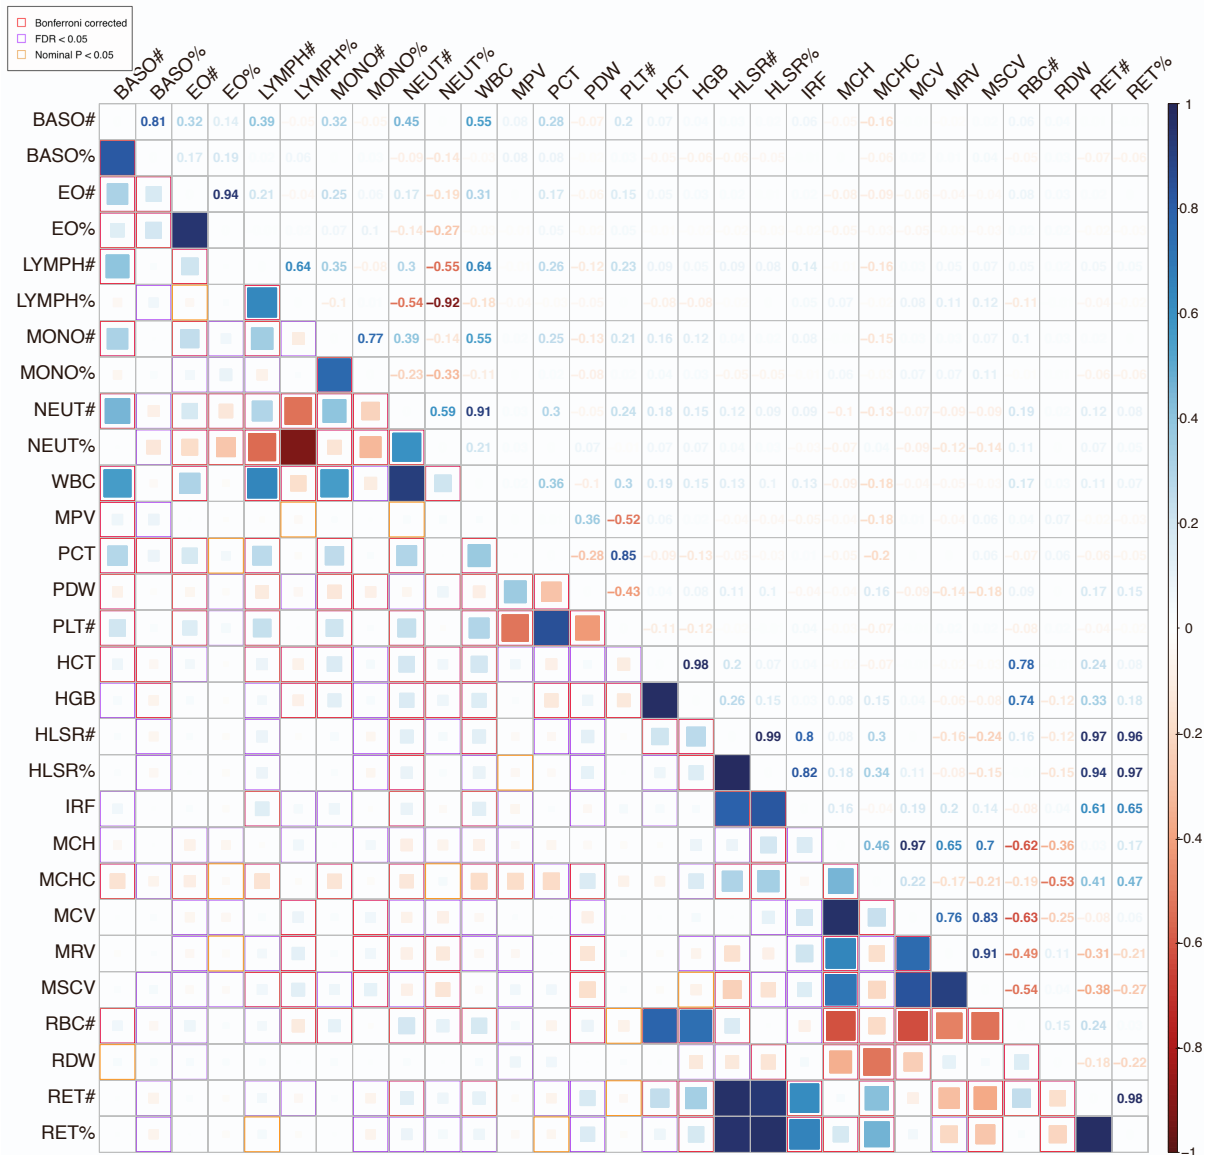

**Figure S4.** Estimated genetic correlations among BCTs using the HDL model, related to STAR Methods. Significant genetic correlations (in lower triangular heatmap) are highlighted by red, purple, or orange boxes if they were Bonferroni-significant, FDR-significant, or nominally significant, respectively. Estimated genetic correlations are shown in the upper triangular heatmap.

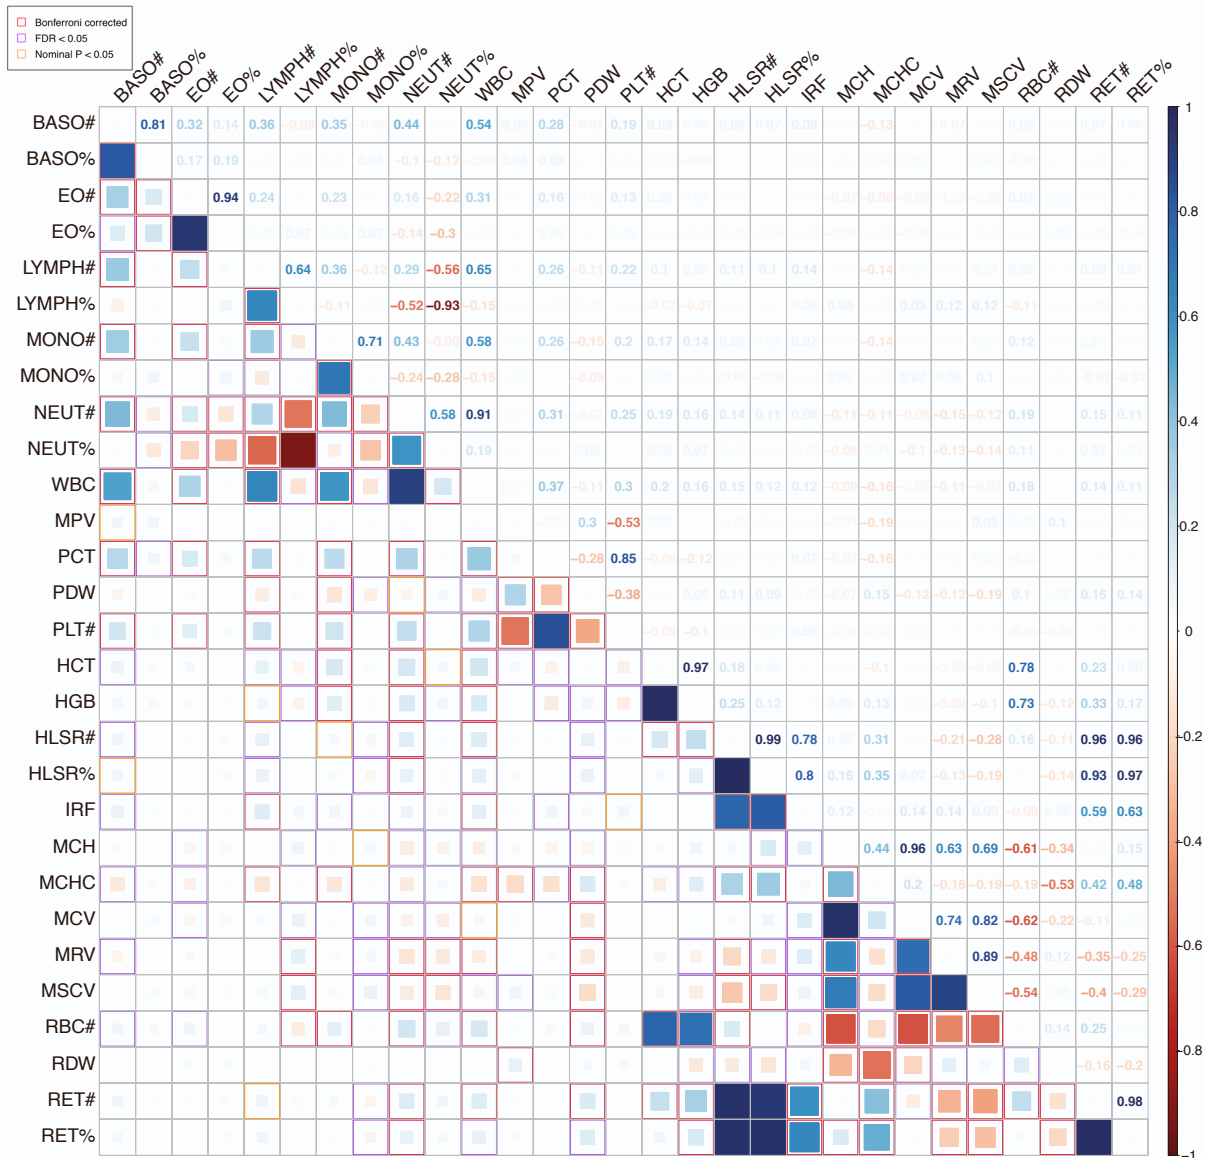

**Figure S5.** Estimated genetic correlations among BCTs using the LDSC model, related to STAR Methods. Significant genetic correlations (in lower triangular heatmap) are highlighted by red, purple, or orange boxes if they were Bonferroni-significant, FDR-significant, or nominally significant, respectively. Estimated genetic correlations are shown in the upper triangular heatmap.

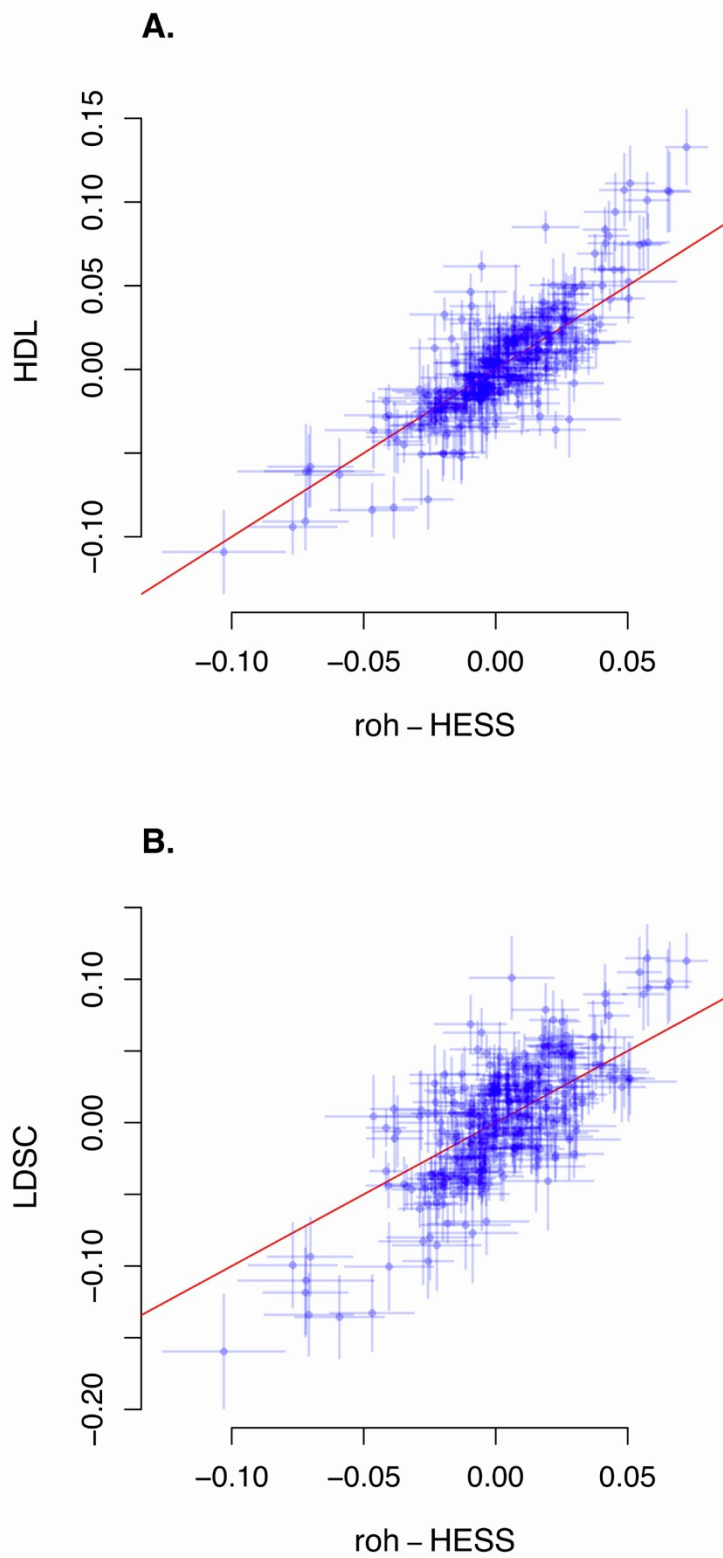

**Figure S6.** Comparison of genetic correlations for BCT-NPD pairs estimated by  $\rho$ -HESS and HDL (A) or LDSC (B), related to Figure 2 and STAR Methods. The estimated correlation = 0.83 (95% CI = 0.79-0.86) for  $\rho$ -HESS and HDL; and 0.74 (95% CI = 0.68-0.79) for  $\rho$ -HESS and LDSC.

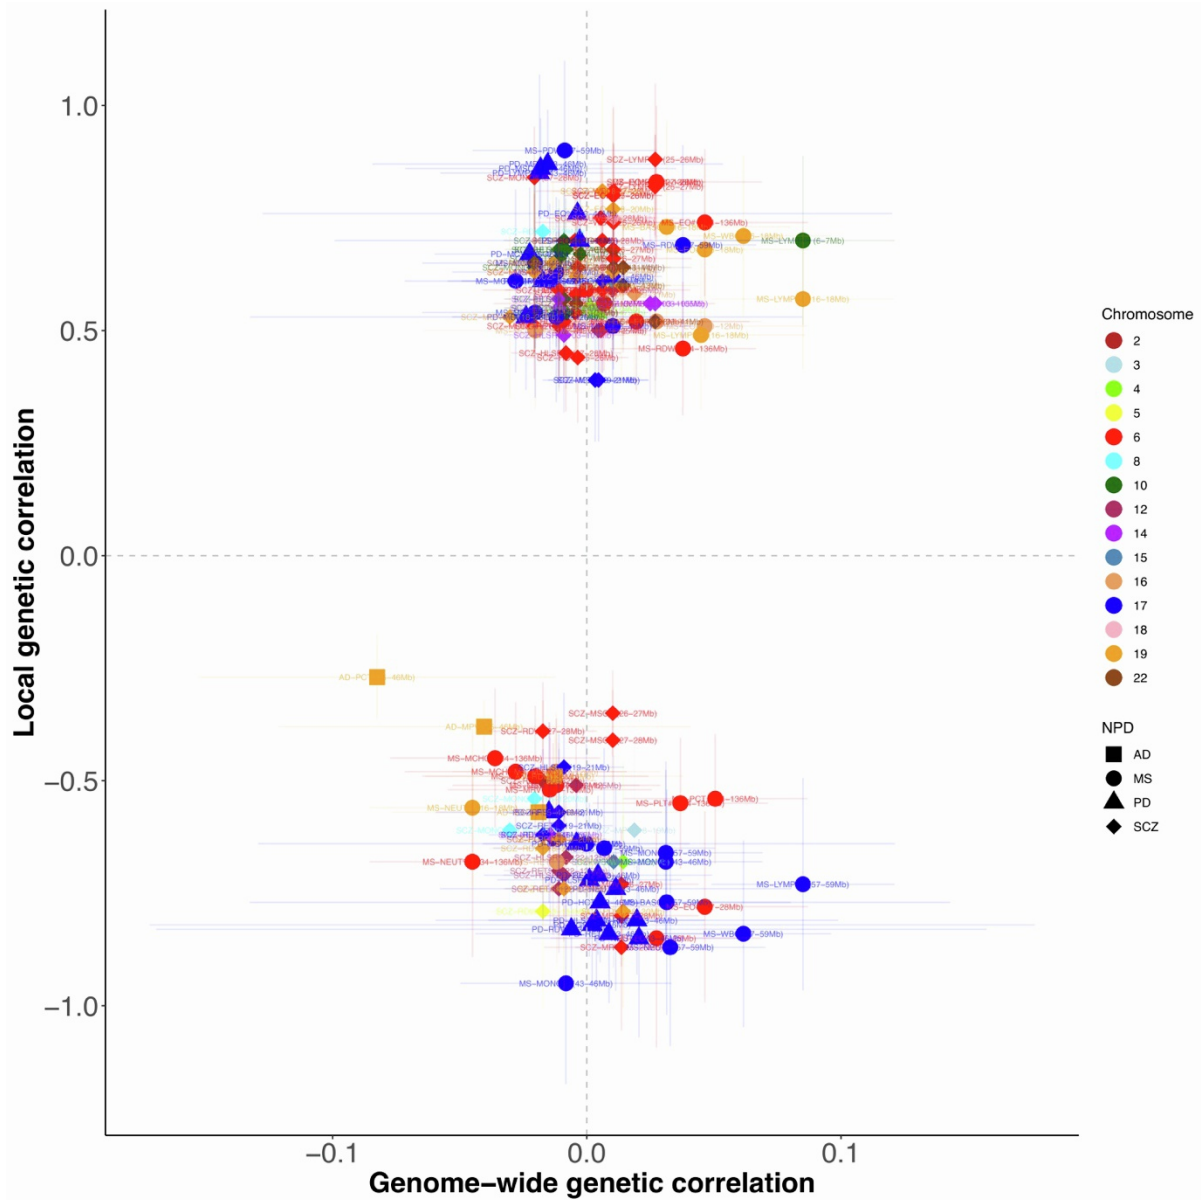

**Figure S7.** Comparison of genome-wide genetic correlations estimated by HDL (x-axis) and local genetic correlations estimated by  $\rho$ -HESS (y-axis) for specific pairs of BCTs and NPDs with Bonferroni-significant local heritability and local genetic correlations, related to STAR Methods. Error bars represent the 95% CIs for the estimated (local) genetic correlations.



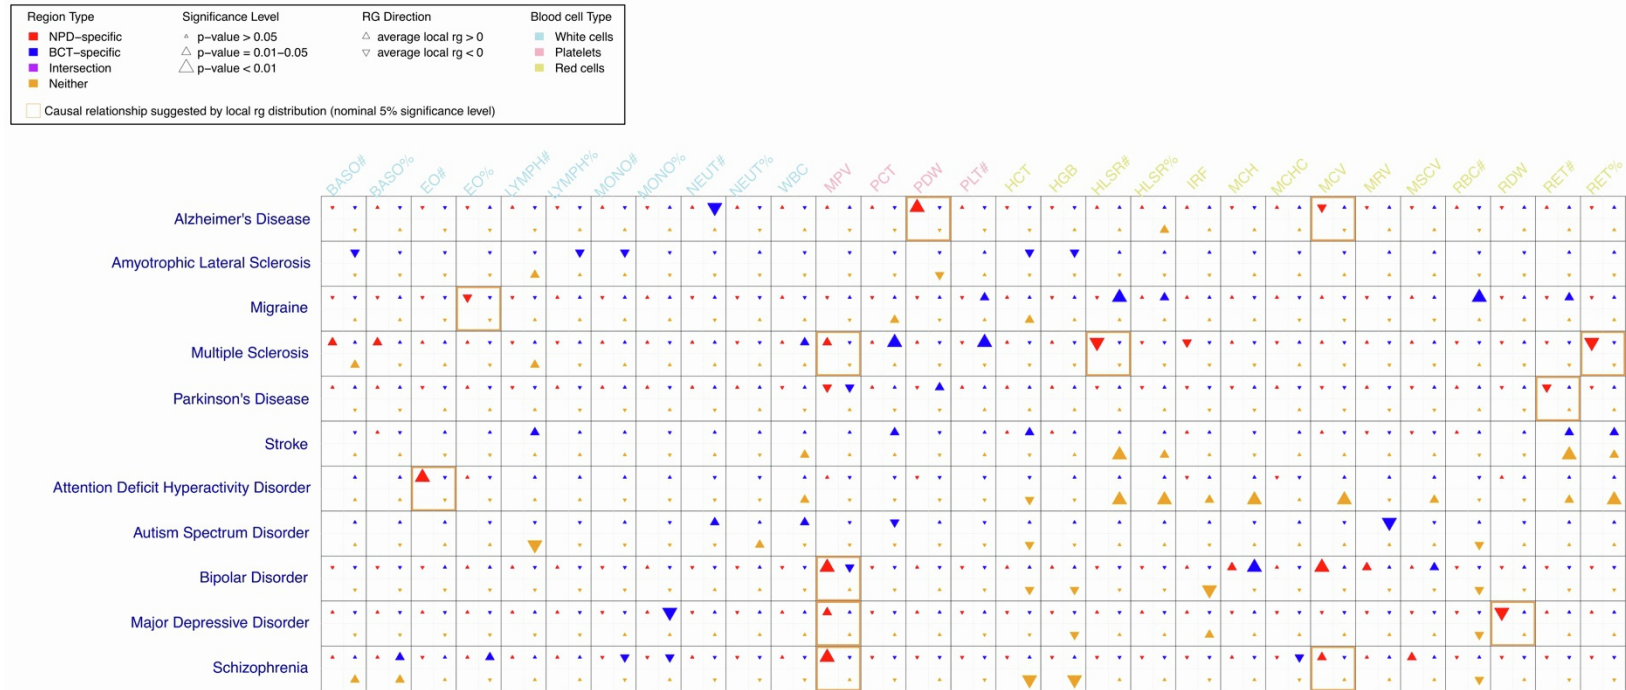

**Figure S8.** Summary of average local genetic correlations between BCTs and NPDs across trait-specific regions using  $\rho$ -HESS, related to STAR Methods. Trait-specific SNPs with GWAS  $p$ -value  $< 5 \times 10^{-8}$  were used for classifying trait-associated genomic regions and to investigate differences in average local genetic correlation between traits. Significant associations are bordered by orange boxes if (i) the average local genetic correlation in regions harbouring BCT-specific SNPs was significantly different from that in “Intersection” regions, “Neither” regions, and regions harbouring the NPD-specific SNPs; and (ii) at least one of the average local genetic correlations estimated from regions harbouring either BCT- or NPD-specific SNPs was significantly non-zero ( $p < 0.05$ ). See Table S19 for complete details of the  $\rho$ -HESS estimates.

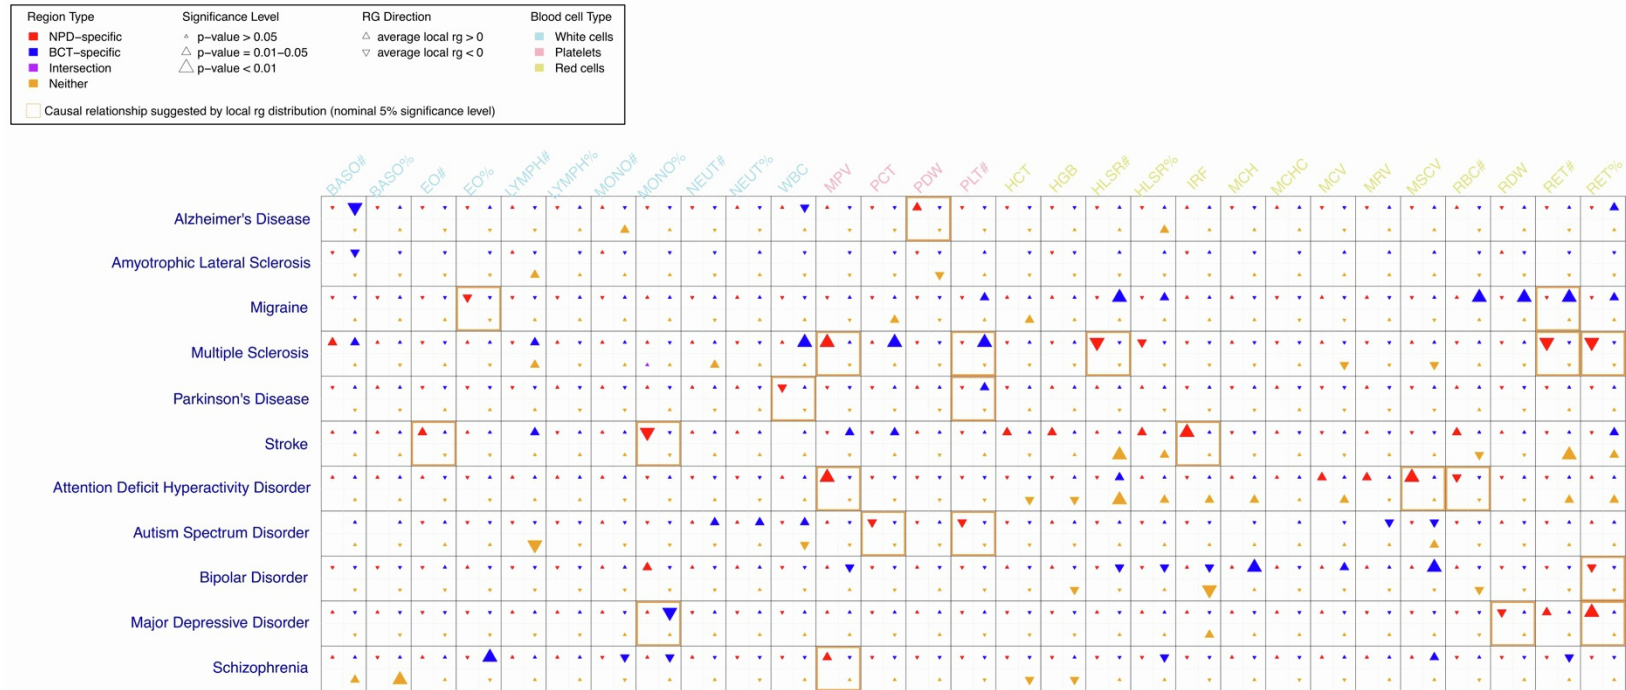

**Figure S9.** Summary of average local genetic correlations between BCTs and NPDs across trait-specific regions using  $\rho$ -HESS, related to STAR Methods. Trait-specific SNPs with GWAS  $p$ -value  $< 1 \times 10^{-6}$  were used for classifying trait-associated genomic regions and to investigate differences in average local genetic correlation between traits. Significant associations are bordered by orange boxes if (i) the average local genetic correlation in regions harbouring BCT-specific SNPs was significantly different from that in “Intersection” regions, “Neither” regions, and regions harbouring the NPD-specific SNPs; and (ii) at least one of the average local genetic correlations estimated from regions harbouring either BCT- or NPD-specific SNPs was significantly non-zero ( $p < 0.05$ ). See Table S20 for complete details of the  $\rho$ -HESS estimates.

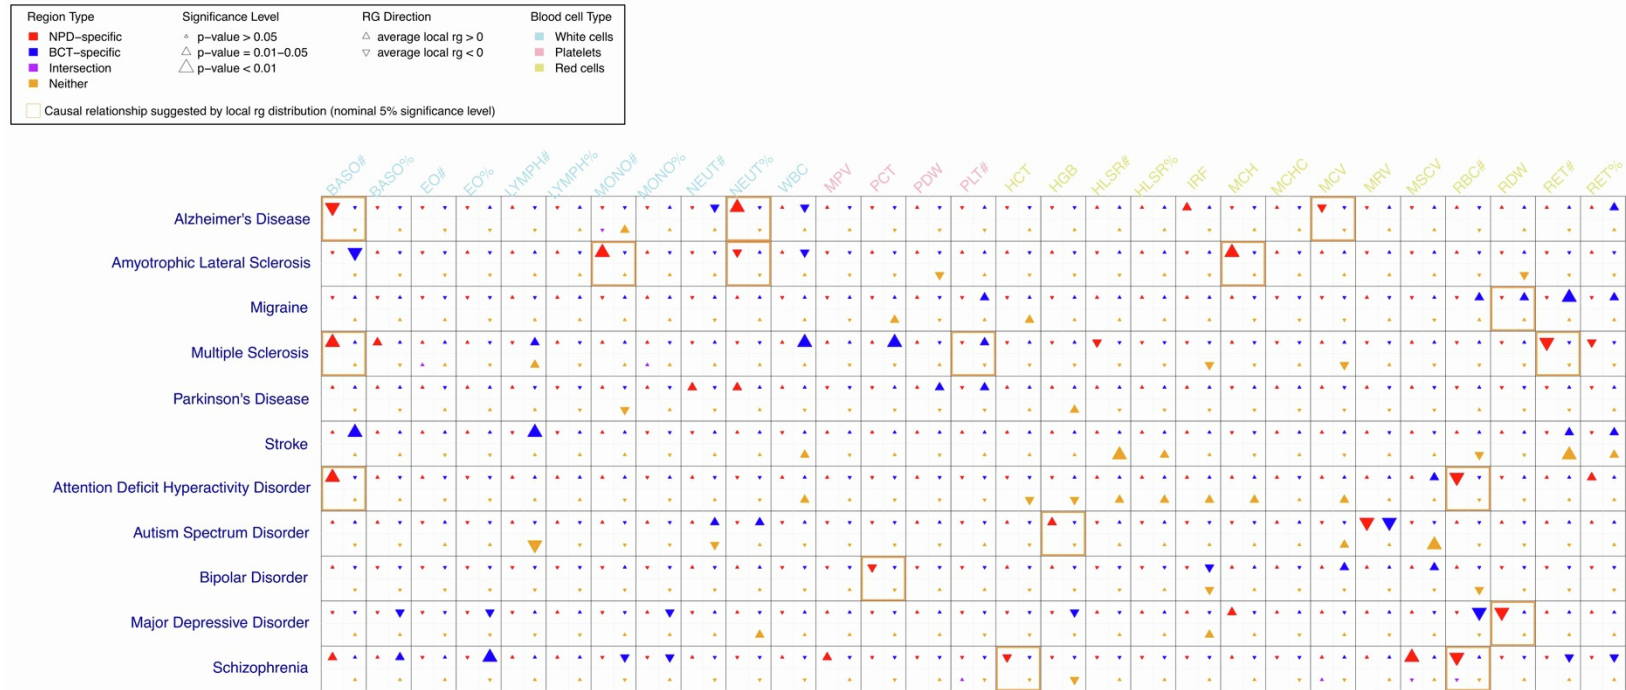

**Figure S10.** Summary of average local genetic correlations between BCTs and NPDs across trait-specific regions using  $\rho$ -HESS, related to STAR Methods. Trait-specific SNPs with GWAS  $p$ -value  $< 1 \times 10^{-5}$  were used for classifying trait-associated genomic regions and to investigate differences in average local genetic correlation between traits. Significant associations are bordered by orange boxes if (i) the average local genetic correlation in regions harbouring BCT-specific SNPs was significantly different from that in “Intersection” regions, “Neither” regions, and regions harbouring the NPD-specific SNPs; and (ii) at least one of the average local genetic correlations estimated from regions harbouring either BCT- or NPD-specific SNPs was significantly non-zero ( $p < 0.05$ ). See Table S21 for complete details of the  $\rho$ -HESS estimates.

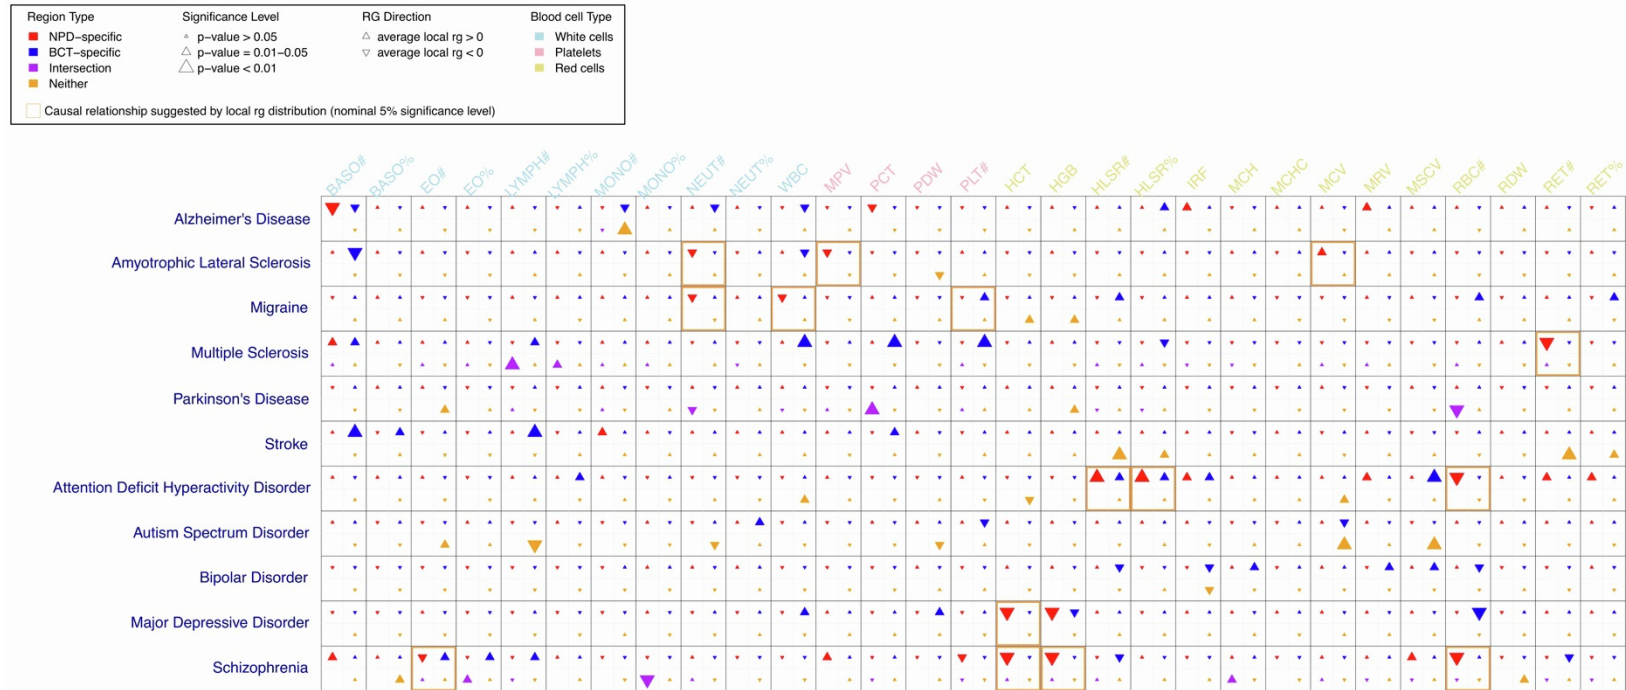

**Figure S11.** Summary of average local genetic correlations between BCTs and NPDs across trait-specific regions using  $\rho$ -HESS, related to STAR Methods. Trait-specific SNPs with GWAS  $p$ -value  $< 1 \times 10^{-4}$  were used for classifying trait-associated genomic regions and to investigate differences in average local genetic correlation between traits. Significant associations are bordered by orange boxes if (i) the average local genetic correlation in regions harbouring BCT-specific SNPs was significantly different from that in “Intersection” regions, “Neither” regions, and regions harbouring the NPD-specific SNPs; and (ii) at least one of the average local genetic correlations estimated from regions harbouring either BCT- or NPD-specific SNPs was significantly non-zero ( $p < 0.05$ ). See Table S22 for complete details of the  $\rho$ -HESS estimates.

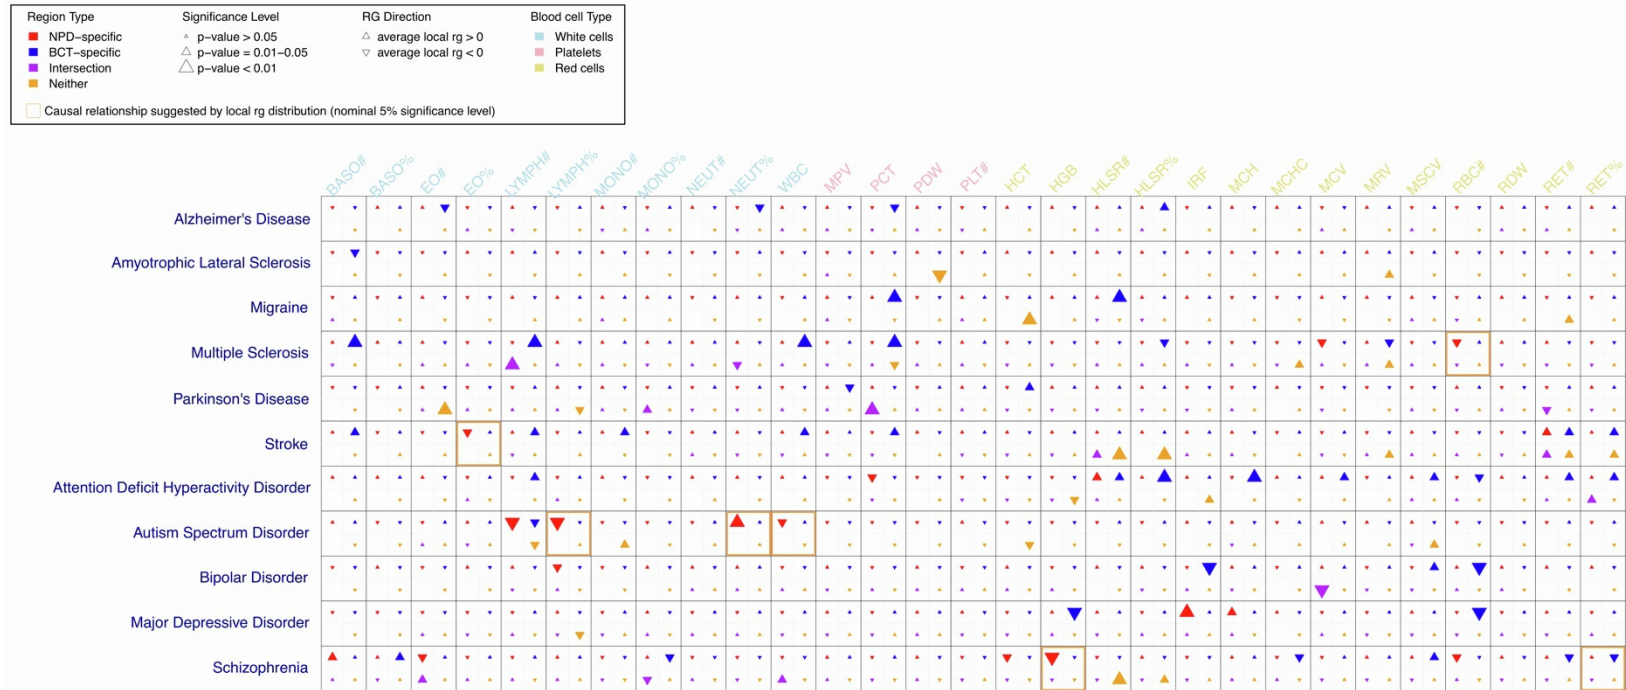

**Figure S12.** Summary of average local genetic correlations between BCTs and NPDs across trait-specific regions using  $\rho$ -HESS, related to STAR Methods. Trait-specific SNPs with GWAS  $p$ -value  $< 1 \times 10^{-3}$  were used for classifying trait-associated genomic regions and to investigate differences in average local genetic correlation between traits. Significant associations are bordered by orange boxes if (i) the average local genetic correlation in regions harbouring BCT-specific SNPs was significantly different from that in “Intersection” regions, “Neither” regions, and regions harbouring the NPD-specific SNPs; and (ii) at least one of the average local genetic correlations estimated from regions harbouring either BCT- or NPD-specific SNPs was significantly non-zero ( $p < 0.05$ ). See Table S23 for complete details of the  $\rho$ -HESS estimates.

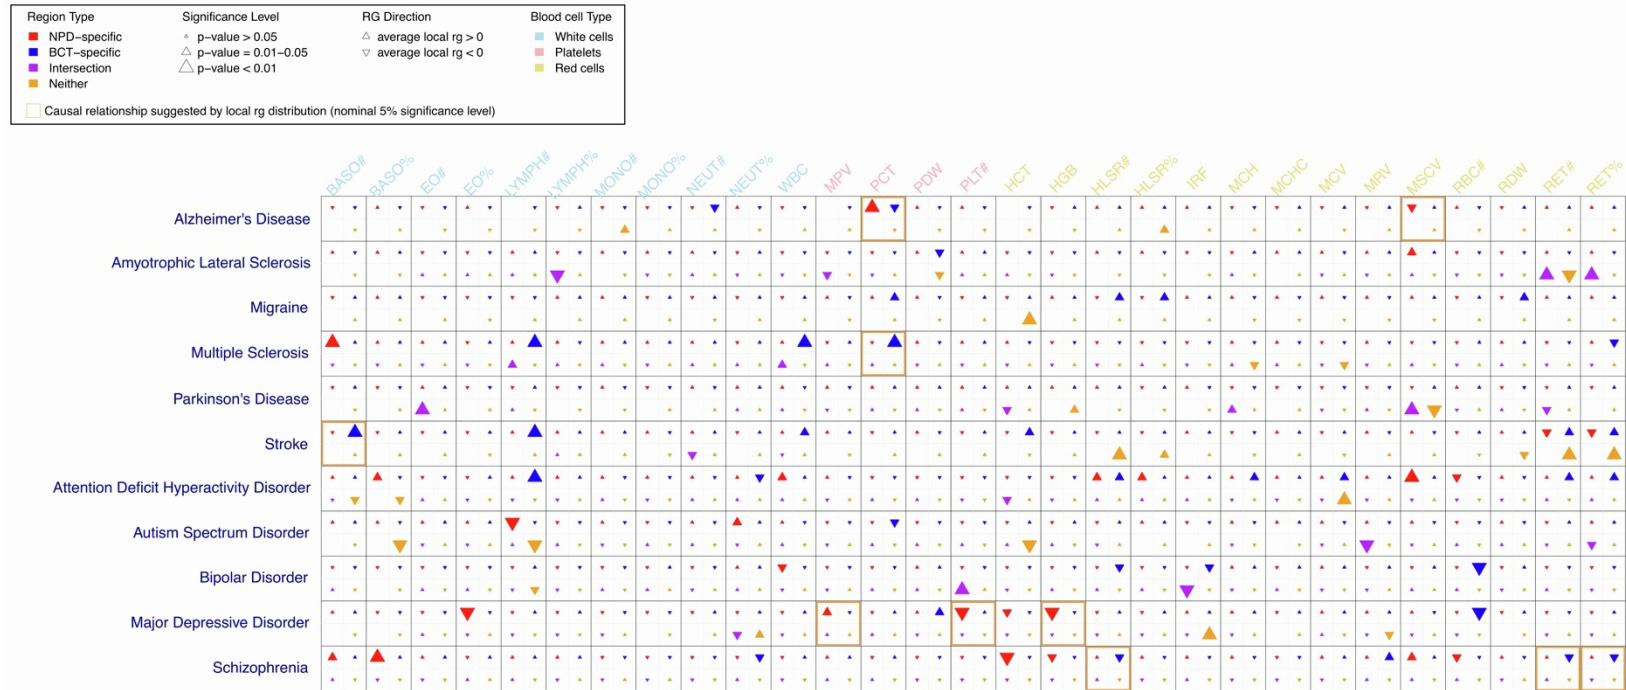

**Figure S13.** Summary of average local genetic correlations between BCTs and NPDs across trait-specific regions using  $\rho$ -HESS, related to STAR Methods. Specific SNPs were selected using the SBayesR method<sup>1</sup> and used for classifying trait-associated genomic regions and to investigate differences in average local genetic correlation between traits. Significant associations are bordered by orange boxes if (i) the average local genetic correlation in regions harbouring BCT-specific SNPs was significantly different from that in “Intersection” regions, “Neither” regions, and regions harbouring the NPD-specific SNPs; and (ii) at least one of the average local genetic correlations estimated from regions harbouring either BCT- or NPD-specific SNPs was significantly non-zero ( $p < 0.05$ ). See Table S24 for complete details of the  $\rho$ -HESS estimates.

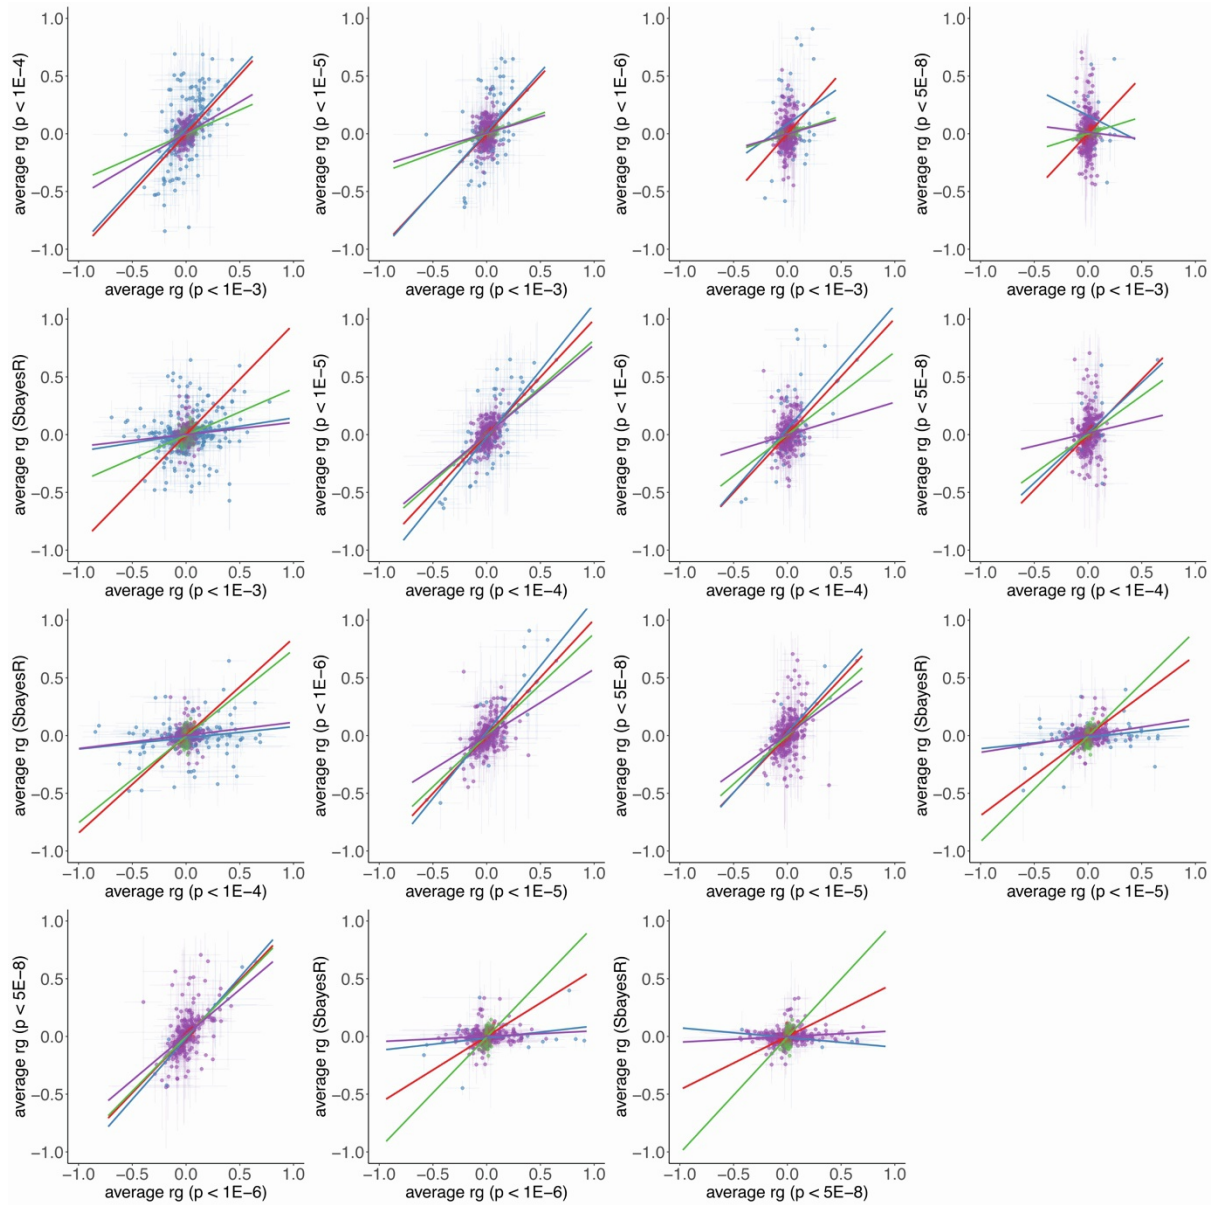

**Figure S14.** Comparison of average local genetic correlations between  $n = 319$  BCT-NPD trait pairs from analyses performed using different p-value thresholds to define trait-specific regions, related to STAR Methods. Dots in red, green, purple and blue represent the estimated average local genetic correlations from the “BCT-specific” regions, “Neither” regions, “NPD-specific” regions, and “Intersection” regions, respectively, with estimated regression lines displayed in the corresponding colours. Error bars represent the standard errors of the estimated average local genetic correlations.

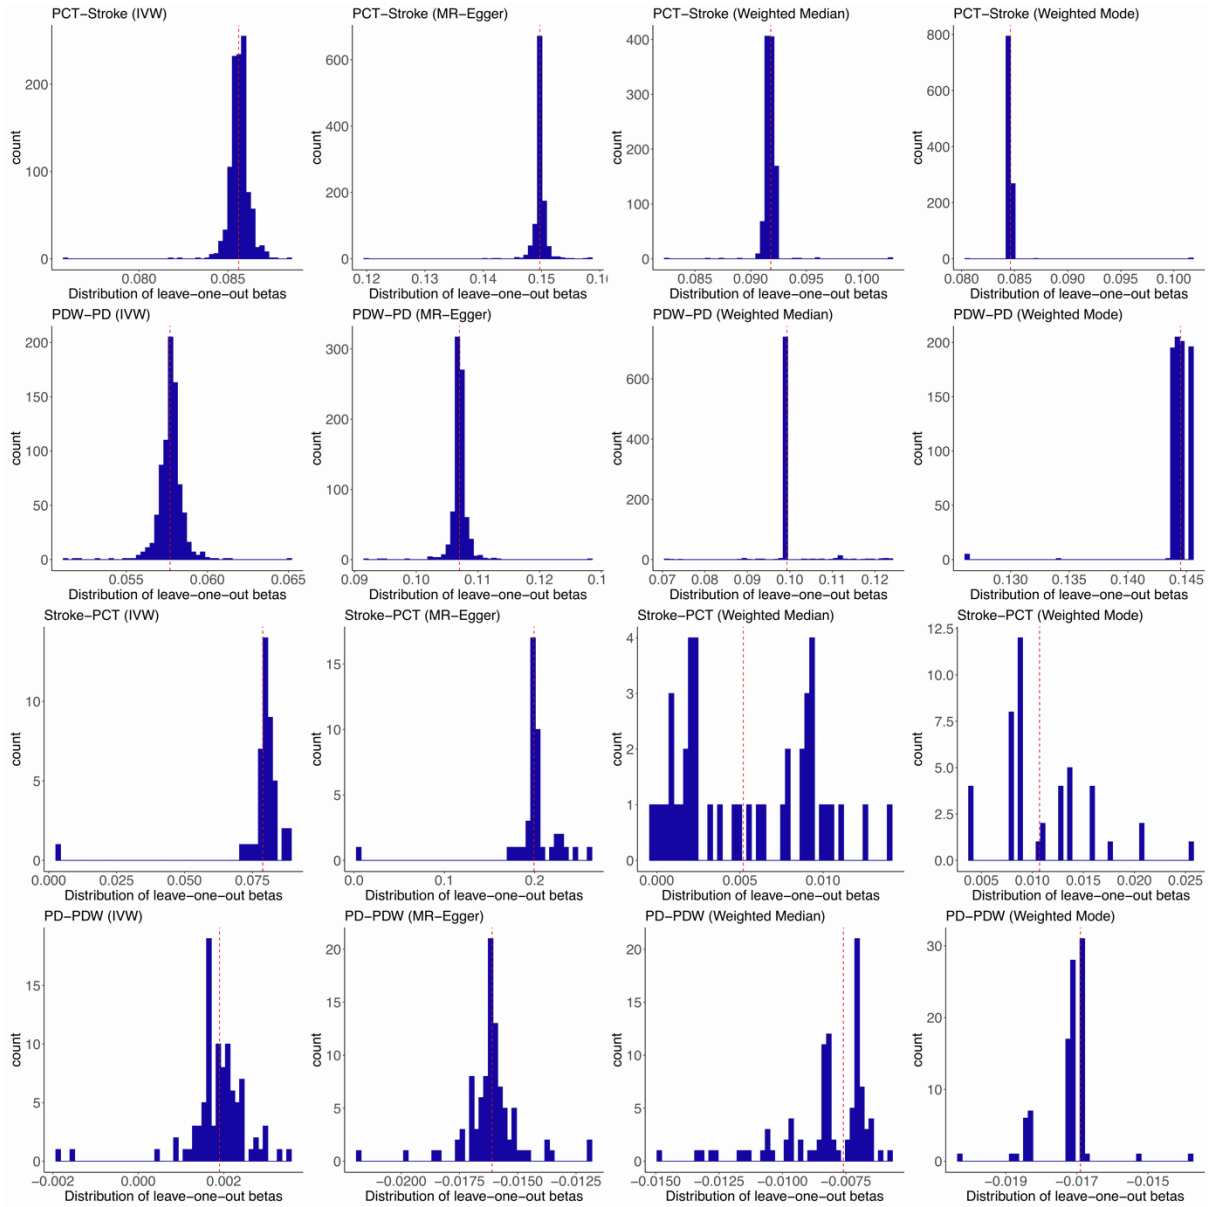

**Figure S15.** Histograms for estimated beta values from leave-one-out analyses assessing the impact of each instrumental SNP on the putative causal relationships between PCT-stroke and PDW-PD, using IVW, MR-Egger, weighted median, and weighted mode models, respectively, related to Figure 3 and STAR Methods. Plots are also shown for the reverse analyses (i.e., stroke-PCT and PD-PDW). Red dashed lines represent the estimated beta values from the original analyses based on all instrumental SNPs.



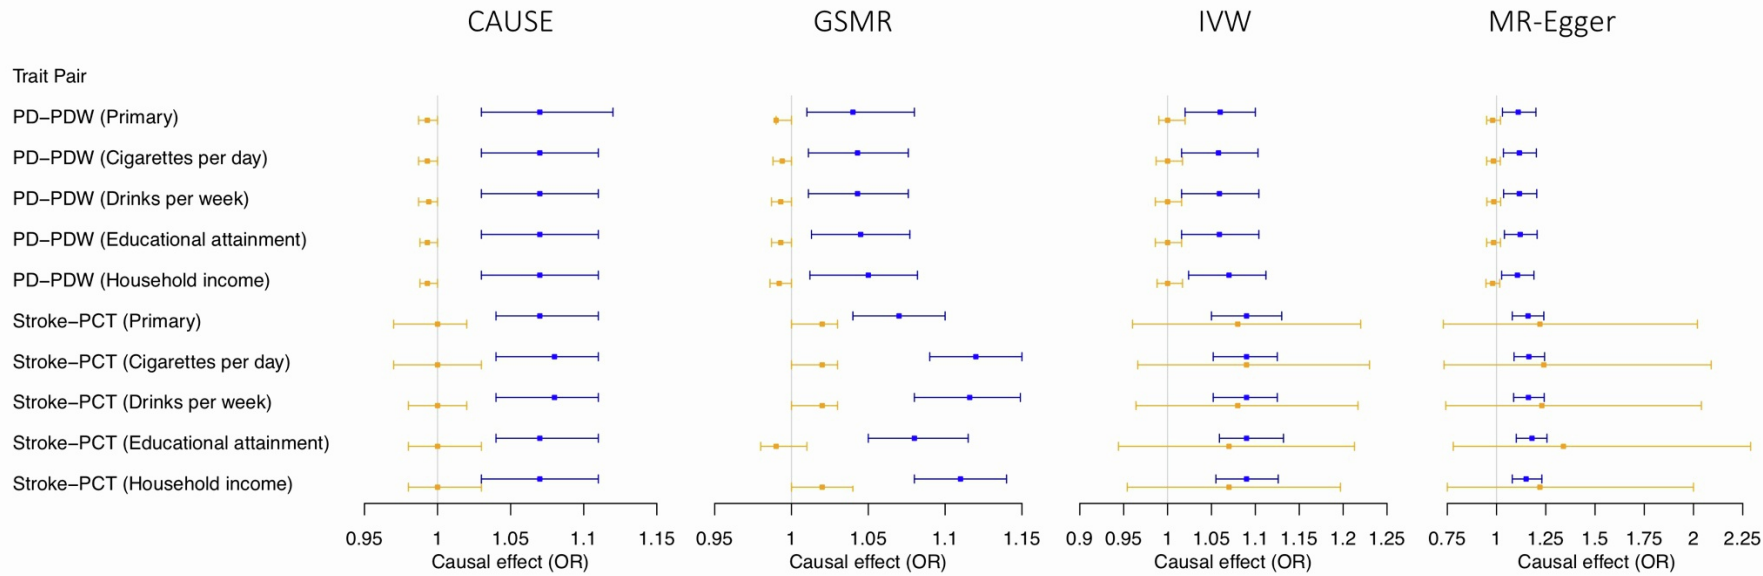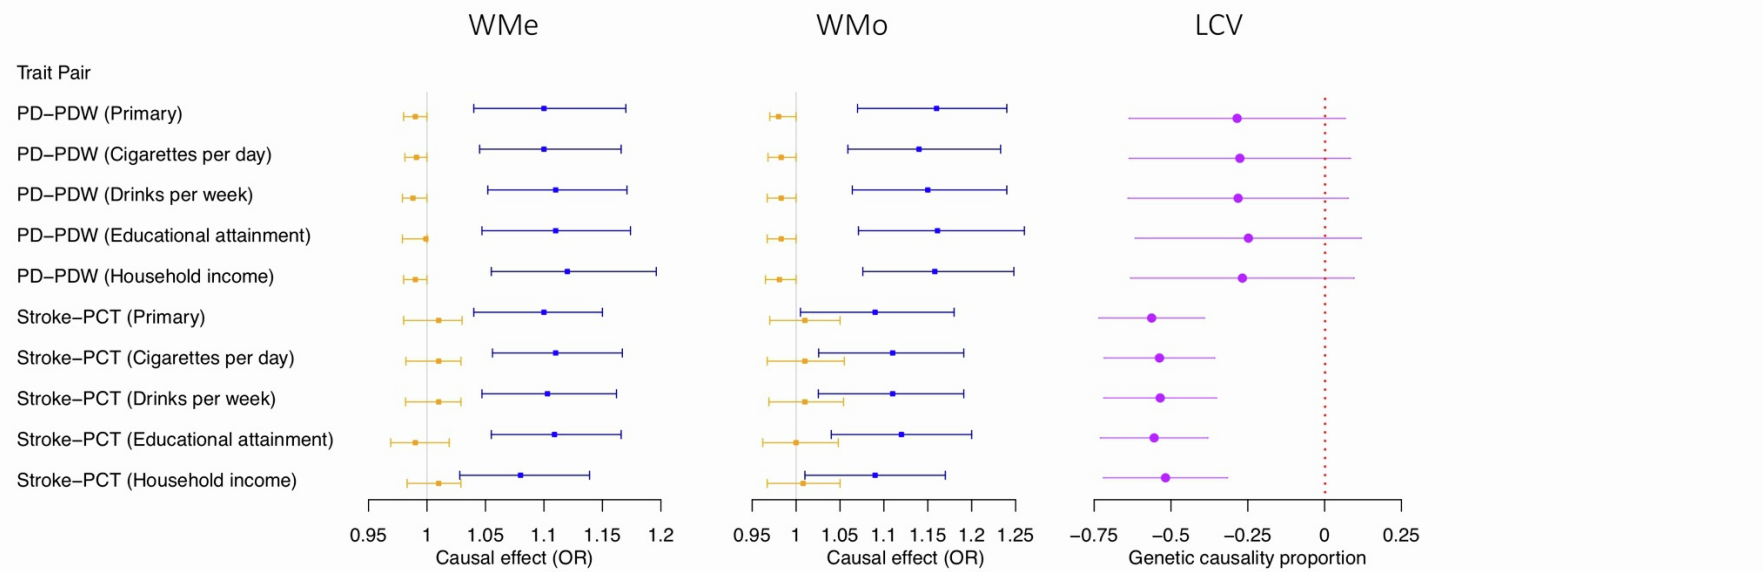

**Figure S16.** Summary of the putative causal relationships between PDW and PD as well as between PCT and stroke after adjusting for the effects of cigarettes per day, drinks per week, educational attainment and household income, respectively, related to Figure 3 and STAR Methods. Results coloured in blue represent the estimated causal effect of BCTs on NPDs, while results coloured in orange represent the estimated causal effect of NPDs on BCTs. Error bars for MR methods represent 95% CIs and those for LCV-based GCP point estimates represent standard errors. For LCV, a negative GCP indicates a causal effect of BCT on NPD, and *vice versa*. See Table S34 for complete details of the estimates.

## Supplemental Tables

| <b>Table S2. Summary of HDL-based genetic correlations adjusted by smoking, drinking, educational attainment and household income individually, related to Figure 2 and STAR Methods.</b> |                     |                                    |                 |                    |                 |                    |                    |         |          |                       |
|-------------------------------------------------------------------------------------------------------------------------------------------------------------------------------------------|---------------------|------------------------------------|-----------------|--------------------|-----------------|--------------------|--------------------|---------|----------|-----------------------|
| Risk factor                                                                                                                                                                               | Trait 1 (NPD)       | Trait 2 (BCT)                      | $h^2$ (Trait 1) | $h^2$ se (Trait 1) | $h^2$ (Trait 2) | $h^2$ se (Trait 2) | genetic covariance | $r_g$   | $r_g$ se | $p$ -value ( $r_g$ )  |
| Cigarettes per day                                                                                                                                                                        | Migraine            | Platelet count                     | 0.0299          | 0.0022             | 0.3169          | 0.0249             | 0.0096             | 0.0981  | 0.0235   | $3.01 \times 10^{-5}$ |
|                                                                                                                                                                                           | Multiple sclerosis  | Lymphocyte count                   | 0.3398          | 0.0227             | 0.2411          | 0.0168             | 0.0232             | 0.0811  | 0.0185   | $1.17 \times 10^{-5}$ |
|                                                                                                                                                                                           | Multiple sclerosis  | White blood cell count             | 0.3398          | 0.0227             | 0.2317          | 0.0152             | 0.0165             | 0.0589  | 0.0181   | $1.11 \times 10^{-3}$ |
|                                                                                                                                                                                           | Parkinson's disease | Platelet distribution width        | 0.0159          | 0.0016             | 0.2214          | 0.0201             | 0.0018             | 0.0303  | 0.0253   | 0.23                  |
|                                                                                                                                                                                           | Schizophrenia       | Monocyte percentage of white cells | 0.3666          | 0.0096             | 0.2451          | 0.0258             | -0.0084            | -0.0279 | 0.0081   | $5.50 \times 10^{-4}$ |
|                                                                                                                                                                                           | Stroke              | Plateletcrit                       | 0.0128          | 0.0021             | 0.2748          | 0.0258             | 0.0068             | 0.1153  | 0.0353   | $1.10 \times 10^{-3}$ |
| Drinks per week                                                                                                                                                                           | Migraine            | Platelet count                     | 0.0290          | 0.0021             | 0.3166          | 0.0248             | 0.0094             | 0.0981  | 0.0235   | $2.93 \times 10^{-5}$ |
|                                                                                                                                                                                           | Multiple sclerosis  | Lymphocyte count                   | 0.3400          | 0.0226             | 0.2404          | 0.0168             | 0.0235             | 0.0820  | 0.0190   | $1.55 \times 10^{-5}$ |
|                                                                                                                                                                                           | Multiple sclerosis  | White blood cell count             | 0.3400          | 0.0226             | 0.2320          | 0.0152             | 0.0177             | 0.0631  | 0.0184   | $6.09 \times 10^{-4}$ |
|                                                                                                                                                                                           | Parkinson's disease | Platelet distribution width        | 0.0159          | 0.0015             | 0.2215          | 0.0200             | 0.0018             | 0.0303  | 0.0249   | 0.22                  |
|                                                                                                                                                                                           | Schizophrenia       | Monocyte percentage of white cells | 0.3803          | 0.0097             | 0.2449          | 0.0258             | -0.0090            | -0.0295 | 0.0081   | $2.69 \times 10^{-4}$ |
|                                                                                                                                                                                           | Stroke              | Plateletcrit                       | 0.0131          | 0.0021             | 0.2748          | 0.0257             | 0.0070             | 0.1158  | 0.0351   | $9.64 \times 10^{-4}$ |
| Educational attainment                                                                                                                                                                    | Migraine            | Platelet count                     | 0.0329          | 0.0022             | 0.3184          | 0.0246             | 0.0096             | 0.0941  | 0.0215   | $1.26 \times 10^{-5}$ |
|                                                                                                                                                                                           | Multiple sclerosis  | Lymphocyte count                   | 0.3396          | 0.0216             | 0.2363          | 0.0153             | 0.0236             | 0.0835  | 0.0190   | $1.17 \times 10^{-5}$ |
|                                                                                                                                                                                           | Multiple sclerosis  | White blood cell count             | 0.3396          | 0.0216             | 0.2242          | 0.0139             | 0.0170             | 0.0617  | 0.0191   | $1.24 \times 10^{-3}$ |
|                                                                                                                                                                                           | Parkinson's disease | Platelet distribution width        | 0.0167          | 0.0016             | 0.2258          | 0.0200             | 0.0018             | 0.0295  | 0.0170   | 0.082                 |
|                                                                                                                                                                                           | Schizophrenia       | Monocyte percentage of white cells | 0.3718          | 0.0098             | 0.2373          | 0.0254             | -0.0095            | -0.0320 | 0.0092   | $4.78 \times 10^{-4}$ |
|                                                                                                                                                                                           | Stroke              | Plateletcrit                       | 0.0129          | 0.0020             | 0.2792          | 0.0261             | 0.0065             | 0.1075  | 0.0343   | $1.72 \times 10^{-3}$ |
| Household income                                                                                                                                                                          | Migraine            | Platelet count                     | 0.0304          | 0.0022             | 0.3138          | 0.0245             | 0.0087             | 0.0886  | 0.0225   | $8.13 \times 10^{-5}$ |
|                                                                                                                                                                                           | Multiple sclerosis  | Lymphocyte count                   | 0.3416          | 0.0225             | 0.2358          | 0.0162             | 0.0247             | 0.0870  | 0.0185   | $2.46 \times 10^{-6}$ |
|                                                                                                                                                                                           | Multiple sclerosis  | White blood cell count             | 0.3416          | 0.0225             | 0.2215          | 0.0145             | 0.0171             | 0.0621  | 0.0195   | $1.42 \times 10^{-3}$ |
|                                                                                                                                                                                           | Parkinson's disease | Platelet distribution width        | 0.0156          | 0.0015             | 0.2223          | 0.0201             | 0.0026             | 0.0449  | 0.0335   | 0.18                  |
|                                                                                                                                                                                           | Schizophrenia       | Monocyte percentage of white cells | 0.3361          | 0.0090             | 0.2395          | 0.0251             | -0.0080            | -0.0280 | 0.0084   | $9.03 \times 10^{-4}$ |
|                                                                                                                                                                                           | Stroke              | Plateletcrit                       | 0.0129          | 0.0020             | 0.2747          | 0.0258             | 0.0062             | 0.1046  | 0.0344   | $2.35 \times 10^{-3}$ |

BCT: blood cell trait. NPD: neurological and psychiatric disorder.  $h^2$ : heritability.  $r_g$ : genetic correlation. se: standard error. HDL: high-definition likelihood.

**Table S25. Comparison of average local genetic correlation between BCTs and NPDs per trait-specific region among different SNP sets for classification of trait-associated regions, related to STAR Methods.**

| Comparison                                       | Group        | Correlation (95% CI) | <i>p</i> -value         |
|--------------------------------------------------|--------------|----------------------|-------------------------|
| $p < 1 \times 10^{-3}$ vs $p < 1 \times 10^{-4}$ | NPD-specific | 0.38 (0.28,0.47)     | $3.02 \times 10^{-12}$  |
| $p < 1 \times 10^{-3}$ vs $p < 1 \times 10^{-4}$ | BCT-specific | 0.88 (0.85,0.90)     | $3.82 \times 10^{-105}$ |
| $p < 1 \times 10^{-3}$ vs $p < 1 \times 10^{-4}$ | Neither      | 0.67 (0.60,0.73)     | $7.80 \times 10^{-43}$  |
| $p < 1 \times 10^{-3}$ vs $p < 1 \times 10^{-4}$ | Intersection | 0.55 (0.42,0.65)     | $2.33 \times 10^{-12}$  |
| $p < 1 \times 10^{-3}$ vs $p < 1 \times 10^{-5}$ | NPD-specific | 0.13 (0.02,0.24)     | 0.017                   |
| $p < 1 \times 10^{-3}$ vs $p < 1 \times 10^{-5}$ | BCT-specific | 0.79 (0.74,0.82)     | $4.19 \times 10^{-68}$  |
| $p < 1 \times 10^{-3}$ vs $p < 1 \times 10^{-5}$ | Neither      | 0.61 (0.54,0.68)     | $2.52 \times 10^{-34}$  |
| $p < 1 \times 10^{-3}$ vs $p < 1 \times 10^{-5}$ | Intersection | 0.52 (0.32,0.67)     | $4.12 \times 10^{-6}$   |
| $p < 1 \times 10^{-3}$ vs $p < 1 \times 10^{-6}$ | NPD-specific | 0.09 (-0.02,0.20)    | 0.091                   |
| $p < 1 \times 10^{-3}$ vs $p < 1 \times 10^{-6}$ | BCT-specific | 0.76 (0.71,0.80)     | $4.76 \times 10^{-61}$  |
| $p < 1 \times 10^{-3}$ vs $p < 1 \times 10^{-6}$ | Neither      | 0.60 (0.52,0.66)     | $3.94 \times 10^{-32}$  |
| $p < 1 \times 10^{-3}$ vs $p < 1 \times 10^{-6}$ | Intersection | 0.23 (-0.14,0.54)    | 0.22                    |
| $p < 1 \times 10^{-3}$ vs $p < 5 \times 10^{-8}$ | NPD-specific | -0.03 (-0.15,0.09)   | 0.63                    |
| $p < 1 \times 10^{-3}$ vs $p < 5 \times 10^{-8}$ | BCT-specific | 0.66 (0.59,0.72)     | $4.53 \times 10^{-41}$  |
| $p < 1 \times 10^{-3}$ vs $p < 5 \times 10^{-8}$ | Neither      | 0.57 (0.50,0.64)     | $2.48 \times 10^{-29}$  |
| $p < 1 \times 10^{-3}$ vs $p < 5 \times 10^{-8}$ | Intersection | -0.18 (-0.67,0.41)   | 0.55                    |
| $p < 1 \times 10^{-4}$ vs $p < 1 \times 10^{-5}$ | NPD-specific | 0.52 (0.44,0.60)     | $1.43 \times 10^{-23}$  |
| $p < 1 \times 10^{-4}$ vs $p < 1 \times 10^{-5}$ | BCT-specific | 0.90 (0.88,0.92)     | $3.40 \times 10^{-118}$ |
| $p < 1 \times 10^{-4}$ vs $p < 1 \times 10^{-5}$ | Neither      | 0.90 (0.88,0.92)     | $3.55 \times 10^{-118}$ |
| $p < 1 \times 10^{-4}$ vs $p < 1 \times 10^{-5}$ | Intersection | 0.82 (0.73,0.89)     | $1.92 \times 10^{-18}$  |
| $p < 1 \times 10^{-4}$ vs $p < 1 \times 10^{-6}$ | NPD-specific | 0.15 (0.04,0.25)     | $9.31 \times 10^{-3}$   |
| $p < 1 \times 10^{-4}$ vs $p < 1 \times 10^{-6}$ | BCT-specific | 0.83 (0.79,0.86)     | $4.89 \times 10^{-83}$  |
| $p < 1 \times 10^{-4}$ vs $p < 1 \times 10^{-6}$ | Neither      | 0.85 (0.82,0.88)     | $1.08 \times 10^{-90}$  |
| $p < 1 \times 10^{-4}$ vs $p < 1 \times 10^{-6}$ | Intersection | 0.64 (0.37,0.81)     | $1.13 \times 10^{-4}$   |
| $p < 1 \times 10^{-4}$ vs $p < 5 \times 10^{-8}$ | NPD-specific | 0.08 (-0.04,0.20)    | 0.18                    |
| $p < 1 \times 10^{-4}$ vs $p < 5 \times 10^{-8}$ | BCT-specific | 0.73 (0.68,0.78)     | $2.81 \times 10^{-55}$  |
| $p < 1 \times 10^{-4}$ vs $p < 5 \times 10^{-8}$ | Neither      | 0.82 (0.78,0.85)     | $5.49 \times 10^{-78}$  |
| $p < 1 \times 10^{-4}$ vs $p < 5 \times 10^{-8}$ | Intersection | 0.51 (-0.06,0.83)    | 0.076                   |
| $p < 1 \times 10^{-5}$ vs $p < 1 \times 10^{-6}$ | NPD-specific | 0.44 (0.35,0.53)     | $8.25 \times 10^{-17}$  |
| $p < 1 \times 10^{-5}$ vs $p < 1 \times 10^{-6}$ | BCT-specific | 0.92 (0.90,0.93)     | $1.84 \times 10^{-129}$ |
| $p < 1 \times 10^{-5}$ vs $p < 1 \times 10^{-6}$ | Neither      | 0.96 (0.95,0.96)     | $6.83 \times 10^{-171}$ |
| $p < 1 \times 10^{-5}$ vs $p < 1 \times 10^{-6}$ | Intersection | 0.90 (0.80,0.95)     | $4.50 \times 10^{-12}$  |
| $p < 1 \times 10^{-5}$ vs $p < 5 \times 10^{-8}$ | NPD-specific | 0.34 (0.23,0.44)     | $7.77 \times 10^{-9}$   |
| $p < 1 \times 10^{-5}$ vs $p < 5 \times 10^{-8}$ | BCT-specific | 0.84 (0.80,0.87)     | $7.12 \times 10^{-86}$  |
| $p < 1 \times 10^{-5}$ vs $p < 5 \times 10^{-8}$ | Neither      | 0.93 (0.91,0.94)     | $7.69 \times 10^{-136}$ |
| $p < 1 \times 10^{-5}$ vs $p < 5 \times 10^{-8}$ | Intersection | 0.88 (0.64,0.96)     | $6.89 \times 10^{-5}$   |
| $p < 1 \times 10^{-6}$ vs $p < 5 \times 10^{-8}$ | NPD-specific | 0.50 (0.41,0.59)     | $2.22 \times 10^{-19}$  |
| $p < 1 \times 10^{-6}$ vs $p < 5 \times 10^{-8}$ | BCT-specific | 0.91 (0.89,0.92)     | $5.84 \times 10^{-121}$ |
| $p < 1 \times 10^{-6}$ vs $p < 5 \times 10^{-8}$ | Neither      | 0.97 (0.96,0.97)     | $1.41 \times 10^{-190}$ |
| $p < 1 \times 10^{-6}$ vs $p < 5 \times 10^{-8}$ | Intersection | 0.96 (0.87,0.99)     | $1.86 \times 10^{-7}$   |
| $p < 1 \times 10^{-3}$ vs $p < \text{SbayesR}$   | NPD-specific | 0.07 (-0.04,0.18)    | 0.19                    |
| $p < 1 \times 10^{-3}$ vs $p < \text{SbayesR}$   | BCT-specific | 0.81 (0.77,0.85)     | $1.46 \times 10^{-76}$  |
| $p < 1 \times 10^{-3}$ vs $p < \text{SbayesR}$   | Neither      | 0.40 (0.30,0.48)     | $1.98 \times 10^{-13}$  |
| $p < 1 \times 10^{-3}$ vs $p < \text{SbayesR}$   | Intersection | 0.17 (0.05,0.29)     | $7.84 \times 10^{-3}$   |
| $p < 1 \times 10^{-4}$ vs $p < \text{SbayesR}$   | NPD-specific | 0.12 (0.01,0.22)     | 0.038                   |
| $p < 1 \times 10^{-4}$ vs $p < \text{SbayesR}$   | BCT-specific | 0.83 (0.79,0.86)     | $4.87 \times 10^{-83}$  |
| $p < 1 \times 10^{-4}$ vs $p < \text{SbayesR}$   | Neither      | 0.45 (0.36,0.54)     | $1.72 \times 10^{-17}$  |
| $p < 1 \times 10^{-4}$ vs $p < \text{SbayesR}$   | Intersection | 0.18 (0.01,0.35)     | 0.041                   |
| $p < 1 \times 10^{-5}$ vs $p < \text{SbayesR}$   | NPD-specific | 0.22 (0.12,0.33)     | $5.75 \times 10^{-5}$   |
| $p < 1 \times 10^{-5}$ vs $p < \text{SbayesR}$   | BCT-specific | 0.76 (0.70,0.80)     | $2.45 \times 10^{-60}$  |
| $p < 1 \times 10^{-5}$ vs $p < \text{SbayesR}$   | Neither      | 0.50 (0.41,0.58)     | $1.14 \times 10^{-21}$  |
| $p < 1 \times 10^{-5}$ vs $p < \text{SbayesR}$   | Intersection | 0.25 (-0.01,0.48)    | 0.060                   |
| $p < 1 \times 10^{-6}$ vs $p < \text{SbayesR}$   | NPD-specific | 0.09 (-0.02,0.20)    | 0.099                   |

|                                                |              |                    |                        |
|------------------------------------------------|--------------|--------------------|------------------------|
| $p < 1 \times 10^{-6}$ vs $p < \text{SbayesR}$ | BCT-specific | 0.69 (0.63,0.74)   | $1.59 \times 10^{-46}$ |
| $p < 1 \times 10^{-6}$ vs $p < \text{SbayesR}$ | Neither      | 0.49 (0.40,0.57)   | $1.18 \times 10^{-20}$ |
| $p < 1 \times 10^{-6}$ vs $p < \text{SbayesR}$ | Intersection | 0.29 (-0.14,0.62)  | 0.19                   |
| $p < 5 \times 10^{-8}$ vs $p < \text{SbayesR}$ | NPD-specific | 0.13 (0.01,0.24)   | 0.033                  |
| $p < 5 \times 10^{-8}$ vs $p < \text{SbayesR}$ | BCT-specific | 0.59 (0.52,0.66)   | $1.17 \times 10^{-31}$ |
| $p < 5 \times 10^{-8}$ vs $p < \text{SbayesR}$ | Neither      | 0.50 (0.41,0.58)   | $1.33 \times 10^{-21}$ |
| $p < 5 \times 10^{-8}$ vs $p < \text{SbayesR}$ | Intersection | -0.54 (-0.92,0.35) | 0.21                   |

BCT: blood cell trait. NPD: neurological and psychiatric disorder. SNP: single nucleotide polymorphism. CI: confidence interval.

**Table S27. Summary of MR sensitivity analyses, related to Figure 3 and STAR Methods.**

| LCV                             |                                 |                                           |                          |        |                        |
|---------------------------------|---------------------------------|-------------------------------------------|--------------------------|--------|------------------------|
| Trait 1                         | Trait 2                         | n of SNPs                                 | GCP*                     | GCP se | p-value                |
| Autism spectrum disorder        | Mean spheric corpuscular volume | 1149387                                   | -0.07                    | 0.32   | 0.46                   |
| Multiple sclerosis              | Lymphocyte count                | 1162211                                   | -0.19                    | 0.13   | 0.25                   |
| Multiple sclerosis              | Plateletcrit                    | 1162184                                   | 0.01                     | 0.58   | 0.98                   |
| Multiple sclerosis              | White blood cell count          | 1162194                                   | 0.08                     | 0.37   | 0.99                   |
| Parkinson's disease             | Platelet distribution width     | 1056850                                   | -0.35                    | 0.43   | 0.17                   |
| Stroke                          | Plateletcrit                    | 1145599                                   | -0.69                    | 0.21   | 4.43×10 <sup>-23</sup> |
| GSMR                            |                                 |                                           |                          |        |                        |
| Exposure                        | Outcome                         | n of SNPs<br>(n after HEIDI-outlier test) | Beta (95% CI)            | OR     | p-value                |
| Autism spectrum disorder**      | Mean spheric corpuscular volume | 34 (30)                                   | -0.01 (-0.0222, 0.0002)  | 0.99   | 0.054                  |
| Mean spheric corpuscular volume | Autism spectrum disorder        | 1172 (1104)                               | -0.07 (-0.1073, -0.0299) | 0.93   | 5.17×10 <sup>-4</sup>  |
| Multiple sclerosis              | Lymphocyte count                | 70 (29)                                   | 0.01 (0.0007, 0.0146)    | 1.01   | 0.030                  |
| Lymphocyte count                | Multiple sclerosis              | 790 (635)                                 | 0.07 (-0.0084, 0.1411)   | 1.07   | 0.082                  |
| Multiple sclerosis              | Plateletcrit                    | 70 (44)                                   | 0.00 (-0.0081, 0.0031)   | 1.00   | 0.38                   |
| Plateletcrit                    | Multiple sclerosis              | 1003 (867)                                | 0.11 (0.05600, 0.1669)   | 1.12   | 8.19×10 <sup>-5</sup>  |
| Multiple sclerosis              | White blood cell count          | 70 (41)                                   | 0.01 (0.0058, 0.0176)    | 1.01   | 1.01×10 <sup>-4</sup>  |
| White blood cell count          | Multiple sclerosis              | 802 (662)                                 | 0.11 (0.0396, 0.1828)    | 1.12   | 2.33×10 <sup>-3</sup>  |
| Parkinson's disease             | Platelet distribution width     | 95 (84)                                   | -0.01 (-0.0123, -0.0004) | 0.99   | 0.036                  |
| Platelet distribution width     | Parkinson's disease             | 804 (719)                                 | 0.04 (0.0114, 0.0732)    | 1.04   | 7.26×10 <sup>-3</sup>  |
| Stroke**                        | Plateletcrit                    | 44 (32)                                   | 0.02 (0.0007, 0.0327)    | 1.02   | 0.041                  |
| Plateletcrit                    | Stroke                          | 1067 (984)                                | 0.07 (0.0385, 0.0972)    | 1.07   | 5.83×10 <sup>-6</sup>  |
| IVW                             |                                 |                                           |                          |        |                        |
| Exposure                        | Outcome                         | n of SNPs                                 | Beta (95% CI)            | OR     | p-value                |
| Autism spectrum disorder**      | Mean spheric corpuscular volume | 34                                        | -0.04 (-0.0812, 0.0093)  | 0.96   | 0.12                   |
| Mean spheric corpuscular volume | Autism spectrum disorder        | 1172                                      | -0.08 (-0.1190, -0.0354) | 0.93   | 2.94×10 <sup>-4</sup>  |
| Multiple sclerosis              | Lymphocyte count                | 70                                        | 0.02 (-0.0112, 0.0448)   | 1.02   | 0.24                   |
| Lymphocyte count                | Multiple sclerosis              | 790                                       | 0.25 (0.1413, 0.3612)    | 1.29   | 7.45×10 <sup>-6</sup>  |
| Multiple sclerosis              | Plateletcrit                    | 70                                        | -0.01 (-0.0363, 0.0086)  | 0.99   | 0.23                   |
| Plateletcrit                    | Multiple sclerosis              | 1003                                      | 0.09 (0.0080, 0.1702)    | 1.09   | 0.031                  |
| Multiple sclerosis              | White blood cell count          | 70                                        | 0.00 (-0.0177, 0.0214)   | 1.00   | 0.85                   |
| White blood cell count          | Multiple sclerosis              | 802                                       | 0.12 (0.0181, 0.2279)    | 1.13   | 0.022                  |
| Parkinson's disease             | Platelet distribution width     | 95                                        | 0.00 (-0.0128, 0.0165)   | 1.00   | 0.80                   |
| Platelet distribution width     | Parkinson's disease             | 804                                       | 0.06 (0.0164, 0.0990)    | 1.06   | 6.13×10 <sup>-3</sup>  |
| Stroke**                        | Plateletcrit                    | 44                                        | 0.08 (-0.0380, 0.1956)   | 1.08   | 0.19                   |

|                                 |                                 |           |                          |      |                       |
|---------------------------------|---------------------------------|-----------|--------------------------|------|-----------------------|
| Plateletcrit                    | Stroke                          | 1067      | 0.09 (0.0519, 0.1193)    | 1.09 | 6.32×10 <sup>-7</sup> |
| MR-Egger                        |                                 |           |                          |      |                       |
| Exposure                        | Outcome                         | n of SNPs | Beta (95% CI)            | OR   | p-value               |
| Autism spectrum disorder**      | Mean spheric corpuscular volume | 34        | -0.06 (-0.3282, 0.2110)  | 0.94 | 0.67                  |
| Mean spheric corpuscular volume | Autism spectrum disorder        | 1172      | -0.06 (-0.1375, 0.0170)  | 0.94 | 0.13                  |
| Multiple sclerosis              | Lymphocyte count                | 70        | -0.04 (-0.1713, 0.0909)  | 0.96 | 0.55                  |
| Lymphocyte count                | Multiple sclerosis              | 790       | 0.59 (0.3429, 0.8434)    | 1.81 | 3.97×10 <sup>-6</sup> |
| Multiple sclerosis              | Plateletcrit                    | 70        | -0.04 (-0.1456, 0.0660)  | 0.96 | 0.46                  |
| Plateletcrit                    | Multiple sclerosis              | 1003      | 0.21 (0.0425, 0.3773)    | 1.23 | 0.014                 |
| Multiple sclerosis              | White blood cell count          | 70        | -0.01 (-0.1038, 0.0805)  | 0.99 | 0.81                  |
| White blood cell count          | Multiple sclerosis              | 802       | 0.08 (-0.1726, 0.3365)   | 1.09 | 0.53                  |
| Parkinson's disease             | Platelet distribution width     | 95        | -0.02 (-0.0513, 0.0191)  | 0.98 | 0.37                  |
| Platelet distribution width     | Parkinson's disease             | 804       | 0.11 (0.0321, 0.1819)    | 1.11 | 5.23×10 <sup>-3</sup> |
| Stroke**                        | Plateletcrit                    | 44        | 0.20 (-0.3047, 0.7034)   | 1.22 | 0.44                  |
| Plateletcrit                    | Stroke                          | 1067      | 0.15 (0.0813, 0.2181)    | 1.16 | 1.96×10 <sup>-5</sup> |
| Weighted Median                 |                                 |           |                          |      |                       |
| Exposure                        | Outcome                         | n of SNPs | Beta (95% CI)            | OR   | p-value               |
| Autism spectrum disorder**      | Mean spheric corpuscular volume | 34        | -0.01 (-0.0261, 0.0068)  | 0.99 | 0.25                  |
| Mean spheric corpuscular volume | Autism spectrum disorder        | 1172      | -0.05 (-0.1262, 0.0177)  | 0.95 | 0.14                  |
| Multiple sclerosis              | Lymphocyte count                | 70        | -0.01 (-0.0191, 0.0027)  | 0.99 | 0.14                  |
| Lymphocyte count                | Multiple sclerosis              | 790       | 0.33 (0.2056, 0.4519)    | 1.39 | 1.69×10 <sup>-7</sup> |
| Multiple sclerosis              | Plateletcrit                    | 70        | 0.00 (-0.0126, 0.0055)   | 1.00 | 0.44                  |
| Plateletcrit                    | Multiple sclerosis              | 1003      | 0.10 (-0.0113, 0.2041)   | 1.10 | 0.079                 |
| Multiple sclerosis              | White blood cell count          | 70        | 0.01 (-0.0015, 0.0176)   | 1.01 | 0.099                 |
| White blood cell count          | Multiple sclerosis              | 802       | 0.15 (0.0302, 0.2730)    | 1.16 | 0.014                 |
| Parkinson's disease             | Platelet distribution width     | 95        | -0.01 (-0.0175, 0.0023)  | 0.99 | 0.12                  |
| Platelet distribution width     | Parkinson's disease             | 804       | 0.10 (0.0426, 0.1560)    | 1.10 | 7.08×10 <sup>-4</sup> |
| Stroke**                        | Plateletcrit                    | 44        | 0.01 (-0.0187, 0.0292)   | 1.01 | 0.68                  |
| Plateletcrit                    | Stroke                          | 1067      | 0.09 (0.0406, 0.1429)    | 1.10 | 5.28×10 <sup>-4</sup> |
| Weighted Mode                   |                                 |           |                          |      |                       |
| Exposure                        | Outcome                         | n of SNPs | Beta (95% CI)            | OR   | p-value               |
| Autism spectrum disorder**      | Mean spheric corpuscular volume | 34        | 0.00 (-0.0359, 0.0275)   | 1.00 | 0.80                  |
| Mean spheric corpuscular volume | Autism spectrum disorder        | 1172      | -0.08 (-0.1749, 0.0118)  | 0.92 | 0.087                 |
| Multiple sclerosis              | Lymphocyte count                | 70        | -0.02 (-0.0346, -0.0002) | 0.98 | 0.051                 |
| Lymphocyte count                | Multiple sclerosis              | 790       | 0.71 (0.4183, 1.0041)    | 2.04 | 2.31×10 <sup>-6</sup> |
| Multiple sclerosis              | Plateletcrit                    | 70        | 0.00 (-0.0180, 0.0087)   | 1.00 | 0.50                  |
| Plateletcrit                    | Multiple sclerosis              | 1003      | 0.13 (-0.0234, 0.2895)   | 1.14 | 0.096                 |

|                             |                             |      |                          |      |                       |
|-----------------------------|-----------------------------|------|--------------------------|------|-----------------------|
| Multiple sclerosis          | White blood cell count      | 70   | 0.00 (-0.0115, 0.0215)   | 1.00 | 0.56                  |
| White blood cell count      | Multiple sclerosis          | 802  | 0.13 (-0.1263, 0.3828)   | 1.14 | 0.32                  |
| Parkinson's disease         | Platelet distribution width | 95   | -0.02 (-0.0320, -0.0018) | 0.98 | 0.020                 |
| Platelet distribution width | Parkinson's disease         | 804  | 0.14 (0.0641, 0.2250)    | 1.16 | 1.87×10 <sup>-4</sup> |
| Stroke**                    | Plateletcrit                | 44   | 0.01 (-0.0310, 0.0523)   | 1.01 | 0.64                  |
| Plateletcrit                | Stroke                      | 1067 | 0.08 (0.0045, 0.1646)    | 1.09 | 0.049                 |

\*Positive GCP suggests the causal effect of NPD on BCT, and *vice versa*. \*\*MR models utilised instrumental SNPs with  $p < 1 \times 10^{-5}$ . BCT: blood cell trait. NPD: neurological and psychiatric disorder. OR: odds ratio. SNP: single nucleotide polymorphism. MR: Mendelian randomisation. LCV: latent causal variable model. GSMR: generalised summary-data-based Mendelian randomisation. IVW: inverse variance weighting. GCP: genetic causal proportion. se: standard error.



**Table S28. Phenotypic correlations between LYMPH# and MS, PCT and stroke, and PDW and PD in the UK Biobank, related to Figure 3 and STAR Methods.**

| Neurological and psychiatric disorder UK Biobank code (field code) |                                  | Trait Pair       |                                                            |                       |
|--------------------------------------------------------------------|----------------------------------|------------------|------------------------------------------------------------|-----------------------|
|                                                                    |                                  | LYMPH# - MS      | PCT - Stroke                                               | PDW - PD              |
|                                                                    |                                  | MS (41270 [G35]) | Stroke (42007+42009+41270 [I64]; exclude self-report only) | PD (41270 [G20])      |
| Full sample                                                        | Sample size (MS/Stroke/PD cases) | 347898 (1238)    | 347898 (5288)                                              | 347898 (1323)         |
|                                                                    | Correlation                      | -0.0010          | 0.0042                                                     | 0.0057                |
|                                                                    | <i>p</i> -value                  | 0.55             | 0.014                                                      | 8.44×10 <sup>-4</sup> |
| proportion of cases at 1%                                          | Sample size (MS/Stroke/PD cases) | 123800 (1238)    | -                                                          | 132300 (1323)         |
|                                                                    | Correlation                      | -0.0016          | -                                                          | 0.0055                |
|                                                                    | <i>p</i> -value                  | 0.57             | -                                                          | 0.071                 |
| proportion of cases at 2%                                          | Sample size (MS/Stroke/PD cases) | 61900 (1238)     | -                                                          | 66150 (1323)          |
|                                                                    | Correlation                      | -0.0025          | -                                                          | 0.0077                |
|                                                                    | <i>p</i> -value                  | 0.54             | -                                                          | 0.051                 |
| proportion of cases at 5%                                          | Sample size (MS/Stroke/PD cases) | 24760 (1238)     | 105760 (5288)                                              | 26460 (1323)          |
|                                                                    | Correlation                      | -0.0021          | 0.0131                                                     | 0.0123                |
|                                                                    | <i>p</i> -value                  | 0.75             | 2.86×10 <sup>-5</sup>                                      | 0.049                 |
| proportion of cases at 10%                                         | Sample size (MS/Stroke/PD cases) | -                | 52880 (5288)                                               | -                     |
|                                                                    | Correlation                      | -                | 0.0097                                                     | -                     |
|                                                                    | <i>p</i> -value                  | -                | 0.029                                                      | -                     |

Controls randomly selected from the 'control' individuals (matched by age [ $\pm$  2 year] and sex per case) to match the proportion of cases (i.e., 1%, 2%, 5% and 10%). More details are provided in the Supplementary Note. LYMPH#: lymphocyte count. MS: multiple sclerosis. PCT: plateletcrit. PDW: platelet distribution width. PD: Parkinson's disease.

**Table S29. Summary of intercept term tests (in MR-Egger regression) and heterogeneity analyses (in IVW and MR-Egger regression), related to Figure 3 and STAR Methods.**

| MR-Egger Intercept test                                                                     |                             |                    |                                 |                             |
|---------------------------------------------------------------------------------------------|-----------------------------|--------------------|---------------------------------|-----------------------------|
| Exposure                                                                                    | Outcome                     | Intercept          | Intercept se                    | <i>p</i> -value             |
| Plateletcrit                                                                                | Stroke                      | -0.0018            | 0.0008                          | 0.035                       |
| Stroke                                                                                      | Plateletcrit                | -0.0069            | 0.0142                          | 0.63                        |
| Platelet distribution width                                                                 | Parkinson's disease         | -0.0017            | 0.0011                          | 0.12                        |
| Parkinson's disease                                                                         | Platelet distribution width | 0.0018             | 0.0016                          | 0.27                        |
| Heterogeneity analysis (IVW)                                                                |                             |                    |                                 |                             |
| Exposure                                                                                    | Outcome                     | Cochran's <i>Q</i> | Cochran's <i>I</i> <sup>2</sup> | Cochran's <i>Q p</i> -value |
| Plateletcrit                                                                                | Stroke                      | 1550.99            | 0.31                            | 1.15×10 <sup>-20</sup>      |
| Stroke                                                                                      | Plateletcrit                | 3292.04            | 0.99                            | 0.00                        |
| Platelet distribution width                                                                 | Parkinson's disease         | 1542.76            | 0.48                            | 3.58×10 <sup>-49</sup>      |
| Parkinson's disease                                                                         | Platelet distribution width | 607.26             | 0.85                            | 4.51×10 <sup>-76</sup>      |
| Heterogeneity analysis (IVW, removal of pleiotropic SNPs identified by GSMR)                |                             |                    |                                 |                             |
| Exposure                                                                                    | Outcome                     | Cochran's <i>Q</i> | Cochran's <i>I</i> <sup>2</sup> | Cochran's <i>Q p</i> -value |
| Plateletcrit                                                                                | Stroke                      | 855.88             | 0.00                            | 1                           |
| Stroke                                                                                      | Plateletcrit                | 39.52              | 0.22                            | 0.14                        |
| Platelet distribution width                                                                 | Parkinson's disease         | 732.97             | 0.03                            | 0.29                        |
| Parkinson's disease                                                                         | Platelet distribution width | 109.41             | 0.27                            | 0.016                       |
| Heterogeneity analysis (MR-Egger)                                                           |                             |                    |                                 |                             |
| Exposure                                                                                    | Outcome                     | Cochran's <i>Q</i> | Cochran's <i>I</i> <sup>2</sup> | Cochran's <i>Q p</i> -value |
| Plateletcrit                                                                                | Stroke                      | 1544.56            | 0.31                            | 2.62×10 <sup>-20</sup>      |
| Stroke                                                                                      | Plateletcrit                | 3273.92            | 0.99                            | 0                           |
| Platelet distribution width                                                                 | Parkinson's disease         | 1538.18            | 0.48                            | 7.76×10 <sup>-49</sup>      |
| Parkinson's disease                                                                         | Platelet distribution width | 599.43             | 0.84                            | 4.88×10 <sup>-75</sup>      |
| Heterogeneity analysis (MR-Egger, removal of pleiotropic SNPs identified by GSMR)           |                             |                    |                                 |                             |
| Exposure                                                                                    | Outcome                     | Cochran's <i>Q</i> | Cochran's <i>I</i> <sup>2</sup> | Cochran's <i>Q p</i> -value |
| Plateletcrit                                                                                | Stroke                      | 854.92             | 0.00                            | 1                           |
| Stroke                                                                                      | Plateletcrit                | 38.19              | 0.21                            | 0.15                        |
| Platelet distribution width                                                                 | Parkinson's disease         | 728.55             | 0.02                            | 0.32                        |
| Parkinson's disease                                                                         | Platelet distribution width | 106.18             | 0.26                            | 0.022                       |
| Estimated causal effects using IVW after the removal of pleiotropic SNPs identified by GSMR |                             |                    |                                 |                             |
| Exposure                                                                                    | Outcome                     | Beta               | Beta se                         | <i>p</i> -value             |
| Plateletcrit                                                                                | Stroke                      | 0.0687             | 0.0150                          | 4.38×10 <sup>-6</sup>       |
| Stroke                                                                                      | Plateletcrit                | 0.0167             | 0.0092                          | 0.069                       |

|                                                                                                         |                             |         |         |                       |
|---------------------------------------------------------------------------------------------------------|-----------------------------|---------|---------|-----------------------|
| Platelet distribution width                                                                             | Parkinson's disease         | 0.0455  | 0.0161  | $4.85 \times 10^{-3}$ |
| Parkinson's disease                                                                                     | Platelet distribution width | -0.0065 | 0.0037  | 0.083                 |
| Estimated causal effects using MR-Egger after the removal of pleiotropic SNPs identified by GSMR        |                             |         |         |                       |
| Exposure                                                                                                | Outcome                     | Beta    | Beta se | <i>p</i> -value       |
| Plateletcrit                                                                                            | Stroke                      | 0.0951  | 0.0308  | $2.06 \times 10^{-3}$ |
| Stroke                                                                                                  | Plateletcrit                | -0.0179 | 0.0352  | 0.61                  |
| Platelet distribution width                                                                             | Parkinson's disease         | 0.0956  | 0.0290  | $1.03 \times 10^{-3}$ |
| Parkinson's disease                                                                                     | Platelet distribution width | -0.0198 | 0.0094  | 0.038                 |
| Estimated causal effects using Weighted Median after the removal of pleiotropic SNPs identified by GSMR |                             |         |         |                       |
| Exposure                                                                                                | Outcome                     | Beta    | Beta se | <i>p</i> -value       |
| Plateletcrit                                                                                            | Stroke                      | 0.0788  | 0.0260  | $2.42 \times 10^{-3}$ |
| Stroke                                                                                                  | Plateletcrit                | 0.0177  | 0.0117  | 0.13                  |
| Platelet distribution width                                                                             | Parkinson's disease         | 0.0729  | 0.0296  | 0.014                 |
| Parkinson's disease                                                                                     | Platelet distribution width | -0.0156 | 0.0050  | $1.91 \times 10^{-3}$ |
| Estimated causal effects using Weighted Mode after the removal of pleiotropic SNPs identified by GSMR   |                             |         |         |                       |
| Exposure                                                                                                | Outcome                     | Beta    | Beta se | <i>p</i> -value       |
| Plateletcrit                                                                                            | Stroke                      | 0.0865  | 0.0423  | 0.041                 |
| Stroke                                                                                                  | Plateletcrit                | -0.0071 | 0.0266  | 0.79                  |
| Platelet distribution width                                                                             | Parkinson's disease         | 0.1382  | 0.0384  | $3.47 \times 10^{-4}$ |
| Parkinson's disease                                                                                     | Platelet distribution width | -0.0209 | 0.0084  | 0.014                 |

MR: Mendelian randomisation. IVW: inverse variance weighting. SNP: single nucleotide polymorphism. GSMR: generalised summary-data-based Mendelian randomisation. se: standard error.

**Table S30. Summary of the leave-one-out analysis for the causal effect of PD on PDW, related to Figure 3 and STAR Methods.**

| Exposure  | Outcome | SNP        | IVW     |         |         | MR-Egger |         |         | Weighted Median |         |                       | Weighted Mode |         |         |
|-----------|---------|------------|---------|---------|---------|----------|---------|---------|-----------------|---------|-----------------------|---------------|---------|---------|
|           |         |            | Beta    | Beta se | p-value | Beta     | Beta se | p-value | Beta            | Beta se | p-value               | Beta          | Beta se | p-value |
| PD        | PDW     | rs10134885 | 0.0023  | 0.0075  | 0.76    | -0.0165  | 0.0180  | 0.36    | -0.0071         | 0.0052  | 0.17                  | -0.0168       | 0.0077  | 0.03    |
|           |         | rs10495249 | 0.0030  | 0.0075  | 0.69    | -0.0160  | 0.0178  | 0.37    | -0.0070         | 0.0052  | 0.18                  | -0.0183       | 0.0077  | 0.02    |
|           |         | rs10502915 | 0.0018  | 0.0075  | 0.81    | -0.0161  | 0.0181  | 0.38    | -0.0083         | 0.0051  | 0.11                  | -0.0172       | 0.0080  | 0.03    |
|           |         | rs10513789 | 0.0011  | 0.0076  | 0.88    | -0.0185  | 0.0183  | 0.31    | -0.0132         | 0.0049  | 7.03×10 <sup>-3</sup> | -0.0171       | 0.0074  | 0.02    |
|           |         | rs10516850 | 0.0023  | 0.0076  | 0.76    | -0.0153  | 0.0185  | 0.41    | -0.0065         | 0.0052  | 0.21                  | -0.0169       | 0.0083  | 0.04    |
|           |         | rs10810834 | 0.0021  | 0.0076  | 0.78    | -0.0160  | 0.0180  | 0.38    | -0.0069         | 0.0050  | 0.17                  | -0.0169       | 0.0083  | 0.05    |
|           |         | rs10878247 | 0.0013  | 0.0075  | 0.86    | -0.0161  | 0.0180  | 0.37    | -0.0096         | 0.0051  | 0.06                  | -0.0171       | 0.0074  | 0.02    |
|           |         | rs10913578 | 0.0004  | 0.0073  | 0.95    | -0.0138  | 0.0175  | 0.43    | -0.0079         | 0.0051  | 0.12                  | -0.0171       | 0.0080  | 0.03    |
|           |         | rs11060180 | 0.0009  | 0.0076  | 0.90    | -0.0173  | 0.0180  | 0.34    | -0.0127         | 0.0052  | 0.01                  | -0.0171       | 0.0079  | 0.03    |
|           |         | rs11150601 | 0.0026  | 0.0076  | 0.73    | -0.0157  | 0.0180  | 0.38    | -0.0067         | 0.0052  | 0.19                  | -0.0168       | 0.0079  | 0.04    |
|           |         | rs11174631 | 0.0019  | 0.0076  | 0.80    | -0.0163  | 0.0183  | 0.38    | -0.0106         | 0.0051  | 0.04                  | -0.0172       | 0.0082  | 0.04    |
|           |         | rs11175655 | 0.0024  | 0.0076  | 0.75    | -0.0152  | 0.0181  | 0.40    | -0.0068         | 0.0050  | 0.17                  | -0.0169       | 0.0085  | 0.05    |
|           |         | rs11683001 | 0.0021  | 0.0075  | 0.78    | -0.0164  | 0.0180  | 0.37    | -0.0070         | 0.0051  | 0.17                  | -0.0169       | 0.0079  | 0.03    |
|           |         | rs11726508 | 0.0017  | 0.0076  | 0.83    | -0.0166  | 0.0181  | 0.36    | -0.0106         | 0.0052  | 0.04                  | -0.0172       | 0.0080  | 0.03    |
|           |         | rs11950533 | 0.0021  | 0.0075  | 0.78    | -0.0160  | 0.0180  | 0.38    | -0.0071         | 0.0048  | 0.13                  | -0.0169       | 0.0077  | 0.03    |
|           |         | rs12147950 | 0.0015  | 0.0075  | 0.84    | -0.0152  | 0.0181  | 0.40    | -0.0081         | 0.0050  | 0.11                  | -0.0171       | 0.0078  | 0.03    |
|           |         | rs12287601 | 0.0020  | 0.0075  | 0.79    | -0.0164  | 0.0181  | 0.37    | -0.0070         | 0.0051  | 0.17                  | -0.0184       | 0.0076  | 0.02    |
|           |         | rs12497850 | 0.0015  | 0.0075  | 0.84    | -0.0156  | 0.0180  | 0.39    | -0.0083         | 0.0050  | 0.09                  | -0.0171       | 0.0082  | 0.04    |
|           |         | rs12503997 | 0.0016  | 0.0075  | 0.84    | -0.0161  | 0.0180  | 0.37    | -0.0085         | 0.0052  | 0.10                  | -0.0171       | 0.0079  | 0.03    |
|           |         | rs12505194 | 0.0016  | 0.0075  | 0.83    | -0.0158  | 0.0181  | 0.38    | -0.0088         | 0.0051  | 0.09                  | -0.0171       | 0.0079  | 0.03    |
|           |         | rs12505231 | 0.0023  | 0.0075  | 0.76    | -0.0148  | 0.0181  | 0.41    | -0.0071         | 0.0048  | 0.14                  | -0.0183       | 0.0080  | 0.02    |
|           |         | rs12726330 | 0.0016  | 0.0077  | 0.83    | -0.0219  | 0.0202  | 0.28    | -0.0149         | 0.0053  | 4.99×10 <sup>-3</sup> | -0.0203       | 0.0080  | 0.01    |
|           |         | rs1293298  | -0.0015 | 0.0069  | 0.83    | -0.0184  | 0.0164  | 0.27    | -0.0081         | 0.0051  | 0.12                  | -0.0171       | 0.0082  | 0.04    |
|           |         | rs12942703 | 0.0019  | 0.0075  | 0.80    | -0.0161  | 0.0180  | 0.37    | -0.0083         | 0.0049  | 0.09                  | -0.0172       | 0.0078  | 0.03    |
|           |         | rs13078687 | 0.0021  | 0.0075  | 0.78    | -0.0161  | 0.0180  | 0.37    | -0.0072         | 0.0050  | 0.15                  | -0.0168       | 0.0084  | 0.05    |
|           |         | rs13294100 | 0.0021  | 0.0076  | 0.78    | -0.0160  | 0.0180  | 0.38    | -0.0068         | 0.0049  | 0.17                  | -0.0169       | 0.0081  | 0.04    |
|           |         | rs1441904  | 0.0021  | 0.0076  | 0.78    | -0.0160  | 0.0180  | 0.38    | -0.0068         | 0.0052  | 0.19                  | -0.0169       | 0.0083  | 0.05    |
|           |         | rs1450522  | 0.0017  | 0.0075  | 0.82    | -0.0159  | 0.0181  | 0.38    | -0.0084         | 0.0050  | 0.09                  | -0.0171       | 0.0079  | 0.03    |
|           |         | rs1461809  | 0.0017  | 0.0075  | 0.82    | -0.0159  | 0.0181  | 0.38    | -0.0083         | 0.0051  | 0.11                  | -0.0171       | 0.0079  | 0.03    |
|           |         | rs1530297  | 0.0017  | 0.0075  | 0.82    | -0.0158  | 0.0181  | 0.39    | -0.0081         | 0.0050  | 0.10                  | -0.0171       | 0.0077  | 0.03    |
|           |         | rs1624451  | 0.0022  | 0.0076  | 0.77    | -0.0158  | 0.0181  | 0.39    | -0.0066         | 0.0051  | 0.20                  | -0.0184       | 0.0081  | 0.02    |
|           |         | rs16857578 | 0.0015  | 0.0076  | 0.85    | -0.0168  | 0.0181  | 0.36    | -0.0099         | 0.0051  | 0.05                  | -0.0171       | 0.0083  | 0.04    |
|           |         | rs17015738 | 0.0020  | 0.0075  | 0.79    | -0.0164  | 0.0181  | 0.37    | -0.0070         | 0.0050  | 0.16                  | -0.0169       | 0.0078  | 0.03    |
|           |         | rs17201246 | 0.0015  | 0.0075  | 0.84    | -0.0162  | 0.0180  | 0.37    | -0.0084         | 0.0051  | 0.10                  | -0.0171       | 0.0074  | 0.02    |
|           |         | rs17698151 | 0.0029  | 0.0074  | 0.70    | -0.0162  | 0.0177  | 0.36    | -0.0073         | 0.0050  | 0.14                  | -0.0183       | 0.0078  | 0.02    |
|           |         | rs17810668 | 0.0021  | 0.0076  | 0.78    | -0.0156  | 0.0182  | 0.39    | -0.0069         | 0.0051  | 0.18                  | -0.0169       | 0.0081  | 0.04    |
|           |         | rs1801274  | 0.0024  | 0.0075  | 0.75    | -0.0170  | 0.0180  | 0.35    | -0.0070         | 0.0051  | 0.17                  | -0.0168       | 0.0081  | 0.04    |
|           |         | rs1866996  | 0.0016  | 0.0076  | 0.83    | -0.0174  | 0.0182  | 0.34    | -0.0096         | 0.0050  | 0.06                  | -0.0172       | 0.0080  | 0.03    |
|           |         | rs199449   | 0.0035  | 0.0077  | 0.65    | -0.0120  | 0.0192  | 0.53    | -0.0058         | 0.0051  | 0.25                  | -0.0138       | 0.0090  | 0.13    |
|           |         | rs2243453  | 0.0016  | 0.0076  | 0.84    | -0.0167  | 0.0181  | 0.36    | -0.0107         | 0.0051  | 0.04                  | -0.0172       | 0.0072  | 0.02    |
| rs2245801 | 0.0030  | 0.0077     | 0.69    | -0.0135 | 0.0189  | 0.48     | -0.0061 | 0.0053  | 0.26            | -0.0153 | 0.0087                | 0.08          |         |         |
| rs2269905 | 0.0020  | 0.0075     | 0.79    | -0.0165 | 0.0181  | 0.36     | -0.0071 | 0.0052  | 0.17            | -0.0169 | 0.0078                | 0.03          |         |         |

|            |         |        |      |         |        |      |         |        |                       |         |        |      |
|------------|---------|--------|------|---------|--------|------|---------|--------|-----------------------|---------|--------|------|
| rs2280104  | 0.0020  | 0.0075 | 0.79 | -0.0167 | 0.0181 | 0.36 | -0.0071 | 0.0050 | 0.16                  | -0.0169 | 0.0076 | 0.03 |
| rs2295545  | 0.0022  | 0.0075 | 0.77 | -0.0169 | 0.0180 | 0.35 | -0.0071 | 0.0050 | 0.16                  | -0.0168 | 0.0086 | 0.05 |
| rs2320431  | 0.0019  | 0.0075 | 0.81 | -0.0161 | 0.0180 | 0.37 | -0.0084 | 0.0052 | 0.10                  | -0.0172 | 0.0081 | 0.04 |
| rs26434    | 0.0013  | 0.0075 | 0.86 | -0.0151 | 0.0180 | 0.40 | -0.0081 | 0.0050 | 0.11                  | -0.0171 | 0.0078 | 0.03 |
| rs2835763  | 0.0033  | 0.0074 | 0.65 | -0.0174 | 0.0175 | 0.32 | -0.0072 | 0.0048 | 0.13                  | -0.0183 | 0.0082 | 0.03 |
| rs298616   | 0.0016  | 0.0075 | 0.83 | -0.0156 | 0.0181 | 0.39 | -0.0081 | 0.0049 | 0.10                  | -0.0171 | 0.0077 | 0.03 |
| rs3104767  | 0.0024  | 0.0075 | 0.75 | -0.0169 | 0.0180 | 0.35 | -0.0070 | 0.0050 | 0.16                  | -0.0168 | 0.0083 | 0.05 |
| rs34869253 | 0.0022  | 0.0075 | 0.77 | -0.0169 | 0.0180 | 0.35 | -0.0071 | 0.0051 | 0.16                  | -0.0168 | 0.0082 | 0.04 |
| rs35643925 | 0.0019  | 0.0076 | 0.81 | -0.0175 | 0.0187 | 0.35 | -0.0129 | 0.0049 | 8.49×10 <sup>-3</sup> | -0.0188 | 0.0077 | 0.02 |
| rs35902694 | 0.0020  | 0.0075 | 0.79 | -0.0166 | 0.0181 | 0.36 | -0.0071 | 0.0048 | 0.14                  | -0.0169 | 0.0080 | 0.04 |
| rs3744434  | 0.0019  | 0.0075 | 0.80 | -0.0161 | 0.0180 | 0.37 | -0.0084 | 0.0049 | 0.09                  | -0.0184 | 0.0086 | 0.04 |
| rs3768408  | 0.0024  | 0.0075 | 0.74 | -0.0161 | 0.0179 | 0.37 | -0.0072 | 0.0049 | 0.14                  | -0.0183 | 0.0076 | 0.02 |
| rs3802920  | 0.0019  | 0.0076 | 0.81 | -0.0161 | 0.0181 | 0.37 | -0.0113 | 0.0051 | 0.03                  | -0.0172 | 0.0080 | 0.03 |
| rs3857047  | 0.0019  | 0.0076 | 0.80 | -0.0161 | 0.0181 | 0.38 | -0.0097 | 0.0051 | 0.05                  | -0.0172 | 0.0078 | 0.03 |
| rs4122861  | 0.0023  | 0.0076 | 0.76 | -0.0151 | 0.0186 | 0.42 | -0.0066 | 0.0050 | 0.18                  | -0.0169 | 0.0080 | 0.04 |
| rs4130047  | 0.0020  | 0.0076 | 0.79 | -0.0160 | 0.0181 | 0.38 | -0.0117 | 0.0051 | 0.02                  | -0.0187 | 0.0083 | 0.03 |
| rs4690326  | 0.0021  | 0.0076 | 0.78 | -0.0159 | 0.0182 | 0.38 | -0.0133 | 0.0053 | 0.01                  | -0.0184 | 0.0089 | 0.04 |
| rs4698412  | 0.0024  | 0.0076 | 0.75 | -0.0155 | 0.0181 | 0.39 | -0.0065 | 0.0049 | 0.18                  | -0.0169 | 0.0081 | 0.04 |
| rs4771267  | 0.0017  | 0.0075 | 0.83 | -0.0158 | 0.0181 | 0.38 | -0.0081 | 0.0051 | 0.12                  | -0.0171 | 0.0078 | 0.03 |
| rs4785224  | 0.0021  | 0.0075 | 0.78 | -0.0169 | 0.0181 | 0.35 | -0.0071 | 0.0049 | 0.15                  | -0.0169 | 0.0079 | 0.04 |
| rs535283   | 0.0014  | 0.0075 | 0.85 | -0.0161 | 0.0180 | 0.37 | -0.0098 | 0.0051 | 0.05                  | -0.0171 | 0.0084 | 0.04 |
| rs544169   | 0.0020  | 0.0075 | 0.79 | -0.0165 | 0.0181 | 0.36 | -0.0071 | 0.0050 | 0.15                  | -0.0169 | 0.0078 | 0.03 |
| rs5910     | -0.0019 | 0.0062 | 0.76 | -0.0120 | 0.0149 | 0.42 | -0.0078 | 0.0048 | 0.11                  | -0.0173 | 0.0077 | 0.03 |
| rs6076910  | 0.0021  | 0.0075 | 0.78 | -0.0162 | 0.0180 | 0.37 | -0.0072 | 0.0050 | 0.15                  | -0.0168 | 0.0077 | 0.03 |
| rs6676110  | 0.0017  | 0.0075 | 0.83 | -0.0159 | 0.0181 | 0.38 | -0.0083 | 0.0049 | 0.09                  | -0.0171 | 0.0080 | 0.03 |
| rs6734966  | 0.0019  | 0.0075 | 0.80 | -0.0162 | 0.0180 | 0.37 | -0.0074 | 0.0049 | 0.13                  | -0.0184 | 0.0079 | 0.02 |
| rs6803771  | 0.0009  | 0.0075 | 0.90 | -0.0146 | 0.0179 | 0.42 | -0.0081 | 0.0050 | 0.10                  | -0.0171 | 0.0083 | 0.04 |
| rs6812193  | 0.0016  | 0.0076 | 0.84 | -0.0163 | 0.0180 | 0.37 | -0.0115 | 0.0052 | 0.03                  | -0.0172 | 0.0081 | 0.04 |
| rs6828371  | 0.0022  | 0.0076 | 0.78 | -0.0155 | 0.0182 | 0.40 | -0.0069 | 0.0051 | 0.17                  | -0.0169 | 0.0077 | 0.03 |
| rs6857404  | 0.0022  | 0.0075 | 0.77 | -0.0169 | 0.0180 | 0.35 | -0.0071 | 0.0050 | 0.16                  | -0.0168 | 0.0084 | 0.05 |
| rs6963     | 0.0012  | 0.0075 | 0.87 | -0.0151 | 0.0180 | 0.40 | -0.0081 | 0.0050 | 0.11                  | -0.0171 | 0.0080 | 0.04 |
| rs7075684  | 0.0019  | 0.0075 | 0.80 | -0.0163 | 0.0181 | 0.37 | -0.0082 | 0.0051 | 0.10                  | -0.0172 | 0.0078 | 0.03 |
| rs721579   | 0.0015  | 0.0075 | 0.85 | -0.0160 | 0.0180 | 0.38 | -0.0093 | 0.0049 | 0.06                  | -0.0171 | 0.0079 | 0.03 |
| rs7562413  | 0.0018  | 0.0075 | 0.81 | -0.0161 | 0.0181 | 0.38 | -0.0081 | 0.0051 | 0.11                  | -0.0172 | 0.0079 | 0.03 |
| rs7749147  | 0.0016  | 0.0075 | 0.83 | -0.0161 | 0.0180 | 0.37 | -0.0081 | 0.0050 | 0.10                  | -0.0171 | 0.0079 | 0.03 |
| rs7938782  | 0.0018  | 0.0075 | 0.82 | -0.0161 | 0.0180 | 0.37 | -0.0083 | 0.0051 | 0.10                  | -0.0172 | 0.0077 | 0.03 |
| rs7991335  | 0.0016  | 0.0075 | 0.83 | -0.0157 | 0.0181 | 0.39 | -0.0081 | 0.0049 | 0.10                  | -0.0171 | 0.0078 | 0.03 |
| rs8012377  | 0.0019  | 0.0075 | 0.80 | -0.0165 | 0.0181 | 0.37 | -0.0083 | 0.0050 | 0.10                  | -0.0184 | 0.0081 | 0.03 |
| rs8018800  | 0.0017  | 0.0076 | 0.83 | -0.0161 | 0.0180 | 0.37 | -0.0104 | 0.0049 | 0.03                  | -0.0172 | 0.0077 | 0.03 |
| rs8045689  | 0.0023  | 0.0075 | 0.76 | -0.0170 | 0.0180 | 0.35 | -0.0071 | 0.0050 | 0.16                  | -0.0168 | 0.0078 | 0.03 |
| rs823114   | 0.0028  | 0.0076 | 0.71 | -0.0149 | 0.0180 | 0.41 | -0.0065 | 0.0052 | 0.21                  | -0.0168 | 0.0077 | 0.03 |
| rs823136   | 0.0020  | 0.0075 | 0.79 | -0.0158 | 0.0181 | 0.39 | -0.0071 | 0.0052 | 0.17                  | -0.0169 | 0.0080 | 0.04 |
| rs8327     | 0.0016  | 0.0076 | 0.83 | -0.0161 | 0.0180 | 0.37 | -0.0096 | 0.0051 | 0.06                  | -0.0172 | 0.0076 | 0.03 |
| rs8946     | 0.0022  | 0.0075 | 0.77 | -0.0164 | 0.0180 | 0.37 | -0.0069 | 0.0048 | 0.15                  | -0.0169 | 0.0077 | 0.03 |
| rs896435   | 0.0016  | 0.0076 | 0.83 | -0.0160 | 0.0180 | 0.38 | -0.0093 | 0.0049 | 0.06                  | -0.0171 | 0.0075 | 0.03 |
| rs9217     | 0.0030  | 0.0074 | 0.68 | -0.0197 | 0.0176 | 0.26 | -0.0074 | 0.0050 | 0.14                  | -0.0167 | 0.0082 | 0.04 |

|  |  |           |        |        |      |         |        |      |         |        |      |         |        |      |
|--|--|-----------|--------|--------|------|---------|--------|------|---------|--------|------|---------|--------|------|
|  |  | rs9295746 | 0.0017 | 0.0076 | 0.82 | -0.0161 | 0.0180 | 0.38 | -0.0090 | 0.0051 | 0.07 | -0.0172 | 0.0076 | 0.03 |
|  |  | rs940634  | 0.0024 | 0.0075 | 0.75 | -0.0159 | 0.0180 | 0.38 | -0.0070 | 0.0050 | 0.16 | -0.0183 | 0.0082 | 0.03 |
|  |  | rs9442714 | 0.0024 | 0.0075 | 0.75 | -0.0169 | 0.0180 | 0.35 | -0.0071 | 0.0049 | 0.15 | -0.0183 | 0.0077 | 0.02 |
|  |  | rs970668  | 0.0013 | 0.0075 | 0.87 | -0.0163 | 0.0179 | 0.37 | -0.0080 | 0.0048 | 0.10 | -0.0171 | 0.0084 | 0.04 |
|  |  | rs976080  | 0.0014 | 0.0076 | 0.85 | -0.0175 | 0.0181 | 0.34 | -0.0106 | 0.0050 | 0.03 | -0.0171 | 0.0079 | 0.03 |
|  |  | rs979812  | 0.0014 | 0.0075 | 0.85 | -0.0154 | 0.0181 | 0.40 | -0.0085 | 0.0049 | 0.08 | -0.0171 | 0.0083 | 0.04 |
|  |  | rs9917256 | 0.0028 | 0.0076 | 0.71 | -0.0137 | 0.0183 | 0.45 | -0.0065 | 0.0050 | 0.19 | -0.0168 | 0.0076 | 0.03 |
|  |  | All       | 0.0019 | 0.0075 | 0.80 | -0.0161 | 0.0180 | 0.37 | -0.0076 | 0.0049 | 0.12 | -0.0169 | 0.0071 | 0.02 |

PDW: platelet distribution width. PD: Parkinson's disease. IVW: inverse variance weighting. SNP: single nucleotide polymorphism. se: standard error.

**Table S32. Summary of the leave-one-out analysis for the causal effect of stroke on PCT, related to Figure 3 and STAR Methods.**

| Exposure | Outcome | SNP        | IVW    |         |         | MR-Egger |         |         | Weighted Median |         |         | Weighted Mode |         |         |
|----------|---------|------------|--------|---------|---------|----------|---------|---------|-----------------|---------|---------|---------------|---------|---------|
|          |         |            | Beta   | Beta se | p-value | Beta     | Beta se | p-value | Beta            | Beta se | p-value | Beta          | Beta se | p-value |
| Stroke   | PCT     | rs1052053  | 0.0879 | 0.0613  | 0.15    | 0.2372   | 0.2630  | 0.37    | 0.0125          | 0.0123  | 0.31    | 0.0080        | 0.0183  | 0.66    |
|          |         | rs10778417 | 0.0789 | 0.0608  | 0.19    | 0.2034   | 0.2644  | 0.45    | 0.0022          | 0.0125  | 0.86    | 0.0089        | 0.0203  | 0.66    |
|          |         | rs11105439 | 0.0802 | 0.0610  | 0.19    | 0.1985   | 0.2603  | 0.45    | 0.0010          | 0.0126  | 0.94    | 0.0112        | 0.0203  | 0.59    |
|          |         | rs11952498 | 0.0792 | 0.0609  | 0.19    | 0.2007   | 0.2632  | 0.45    | 0.0018          | 0.0126  | 0.89    | 0.0088        | 0.0199  | 0.66    |
|          |         | rs12361415 | 0.0828 | 0.0607  | 0.17    | 0.1879   | 0.2610  | 0.48    | 0.0078          | 0.0121  | 0.52    | 0.0080        | 0.0209  | 0.70    |
|          |         | rs12445022 | 0.0802 | 0.0610  | 0.19    | 0.1986   | 0.2603  | 0.45    | 0.0006          | 0.0122  | 0.96    | 0.0088        | 0.0224  | 0.70    |
|          |         | rs12562305 | 0.0813 | 0.0609  | 0.18    | 0.2252   | 0.2676  | 0.40    | 0.0093          | 0.0126  | 0.46    | 0.0128        | 0.0220  | 0.56    |
|          |         | rs12635936 | 0.0813 | 0.0608  | 0.18    | 0.2305   | 0.2696  | 0.40    | 0.0088          | 0.0120  | 0.46    | 0.0128        | 0.0219  | 0.56    |
|          |         | rs1471859  | 0.0798 | 0.0608  | 0.19    | 0.1980   | 0.2634  | 0.46    | 0.0018          | 0.0128  | 0.89    | 0.0088        | 0.0214  | 0.68    |
|          |         | rs1537375  | 0.0839 | 0.0610  | 0.17    | 0.1961   | 0.2597  | 0.45    | 0.0101          | 0.0122  | 0.41    | 0.0080        | 0.0203  | 0.69    |
|          |         | rs1563788  | 0.0871 | 0.0600  | 0.15    | 0.1705   | 0.2588  | 0.51    | 0.0061          | 0.0120  | 0.61    | 0.0078        | 0.0210  | 0.71    |
|          |         | rs17021459 | 0.0798 | 0.0610  | 0.19    | 0.2618   | 0.3031  | 0.39    | 0.0009          | 0.0124  | 0.94    | 0.0040        | 0.0218  | 0.86    |
|          |         | rs17260983 | 0.0820 | 0.0611  | 0.18    | 0.2233   | 0.2665  | 0.41    | 0.0110          | 0.0123  | 0.37    | 0.0208        | 0.0217  | 0.34    |
|          |         | rs1939214  | 0.0811 | 0.0608  | 0.18    | 0.2021   | 0.2602  | 0.44    | 0.0090          | 0.0129  | 0.49    | 0.0128        | 0.0219  | 0.56    |
|          |         | rs2284665  | 0.0810 | 0.0610  | 0.18    | 0.2039   | 0.2608  | 0.44    | 0.0104          | 0.0125  | 0.41    | 0.0208        | 0.0207  | 0.32    |
|          |         | rs2526619  | 0.0804 | 0.0612  | 0.19    | 0.2195   | 0.2698  | 0.42    | -0.0002         | 0.0124  | 0.99    | 0.0040        | 0.0229  | 0.86    |
|          |         | rs2585193  | 0.0806 | 0.0610  | 0.19    | 0.1975   | 0.2604  | 0.45    | 0.0098          | 0.0125  | 0.43    | 0.0160        | 0.0219  | 0.47    |
|          |         | rs2723334  | 0.0832 | 0.0616  | 0.18    | 0.2434   | 0.2742  | 0.38    | 0.0141          | 0.0130  | 0.28    | 0.0256        | 0.0229  | 0.27    |
|          |         | rs2742313  | 0.0886 | 0.0601  | 0.14    | 0.1776   | 0.2577  | 0.49    | 0.0065          | 0.0122  | 0.60    | 0.0080        | 0.0209  | 0.70    |
|          |         | rs3176326  | 0.0779 | 0.0609  | 0.20    | 0.1990   | 0.2603  | 0.45    | 0.0023          | 0.0119  | 0.85    | 0.0137        | 0.0220  | 0.54    |
|          |         | rs3790604  | 0.0784 | 0.0609  | 0.20    | 0.2009   | 0.2651  | 0.45    | 0.0022          | 0.0119  | 0.85    | 0.0089        | 0.0205  | 0.67    |
|          |         | rs4132234  | 0.0796 | 0.0610  | 0.19    | 0.1990   | 0.2603  | 0.45    | 0.0009          | 0.0125  | 0.94    | 0.0040        | 0.0220  | 0.86    |
|          |         | rs42039    | 0.0736 | 0.0609  | 0.23    | 0.1934   | 0.2596  | 0.46    | 0.0033          | 0.0125  | 0.79    | 0.0137        | 0.0216  | 0.53    |
|          |         | rs4783296  | 0.0791 | 0.0610  | 0.19    | 0.1994   | 0.2603  | 0.45    | 0.0013          | 0.0119  | 0.92    | 0.0088        | 0.0199  | 0.66    |
|          |         | rs4793588  | 0.0785 | 0.0609  | 0.20    | 0.1995   | 0.2603  | 0.45    | 0.0021          | 0.0124  | 0.87    | 0.0089        | 0.0211  | 0.68    |
|          |         | rs4886564  | 0.0805 | 0.0609  | 0.19    | 0.2060   | 0.2616  | 0.44    | 0.0092          | 0.0125  | 0.46    | 0.0160        | 0.0207  | 0.45    |
|          |         | rs4903725  | 0.0791 | 0.0608  | 0.19    | 0.1999   | 0.2605  | 0.45    | 0.0022          | 0.0123  | 0.86    | 0.0088        | 0.0212  | 0.68    |
|          |         | rs4950915  | 0.0801 | 0.0608  | 0.19    | 0.1964   | 0.2634  | 0.46    | 0.0054          | 0.0127  | 0.67    | 0.0112        | 0.0208  | 0.59    |
|          |         | rs495828   | 0.0744 | 0.0607  | 0.22    | 0.2011   | 0.2594  | 0.44    | 0.0039          | 0.0130  | 0.76    | 0.0137        | 0.0209  | 0.51    |
|          |         | rs564018   | 0.0797 | 0.0611  | 0.19    | 0.2086   | 0.2653  | 0.44    | 0.0004          | 0.0123  | 0.97    | 0.0040        | 0.0230  | 0.86    |
|          |         | rs653178   | 0.0036 | 0.0220  | 0.87    | 0.0062   | 0.0938  | 0.95    | 0.0051          | 0.0122  | 0.68    | 0.0104        | 0.0210  | 0.62    |
|          |         | rs6544653  | 0.0709 | 0.0603  | 0.24    | 0.2300   | 0.2588  | 0.38    | 0.0046          | 0.0125  | 0.72    | 0.0137        | 0.0218  | 0.53    |
|          |         | rs6561321  | 0.0789 | 0.0612  | 0.20    | 0.2007   | 0.2619  | 0.45    | -0.0001         | 0.0128  | 0.99    | 0.0089        | 0.0209  | 0.67    |
|          |         | rs6584579  | 0.0770 | 0.0610  | 0.21    | 0.2030   | 0.2606  | 0.44    | 0.0020          | 0.0125  | 0.87    | 0.0137        | 0.0193  | 0.48    |
|          |         | rs6596445  | 0.0789 | 0.0609  | 0.19    | 0.1994   | 0.2604  | 0.45    | 0.0019          | 0.0117  | 0.87    | 0.0089        | 0.0219  | 0.69    |
|          |         | rs6825454  | 0.0828 | 0.0609  | 0.17    | 0.1997   | 0.2597  | 0.45    | 0.0093          | 0.0121  | 0.44    | 0.0080        | 0.0217  | 0.71    |
|          |         | rs6838973  | 0.0828 | 0.0607  | 0.17    | 0.1821   | 0.2632  | 0.49    | 0.0079          | 0.0121  | 0.52    | 0.0080        | 0.0227  | 0.73    |
|          |         | rs6872625  | 0.0807 | 0.0608  | 0.18    | 0.1977   | 0.2603  | 0.45    | 0.0091          | 0.0123  | 0.46    | 0.0160        | 0.0208  | 0.45    |
|          |         | rs7488386  | 0.0792 | 0.0608  | 0.19    | 0.2016   | 0.2644  | 0.45    | 0.0021          | 0.0126  | 0.87    | 0.0088        | 0.0195  | 0.65    |
|          |         | rs8064211  | 0.0812 | 0.0609  | 0.18    | 0.1929   | 0.2621  | 0.47    | 0.0093          | 0.0124  | 0.46    | 0.0176        | 0.0204  | 0.39    |
| rs879324 | 0.0816  | 0.0608     | 0.18   | 0.2019  | 0.2600  | 0.44     | 0.0087  | 0.0119  | 0.46            | 0.0128  | 0.0214  | 0.55          |         |         |
| rs880315 | 0.0871  | 0.0606     | 0.15   | 0.1953  | 0.2582  | 0.45     | 0.0077  | 0.0124  | 0.53            | 0.0080  | 0.0214  | 0.71          |         |         |

|  |  |           |        |        |      |        |        |      |        |        |      |        |        |      |
|--|--|-----------|--------|--------|------|--------|--------|------|--------|--------|------|--------|--------|------|
|  |  | rs9112    | 0.0788 | 0.0610 | 0.20 | 0.2008 | 0.2615 | 0.45 | 0.0015 | 0.0123 | 0.90 | 0.0089 | 0.0199 | 0.66 |
|  |  | rs9305020 | 0.0809 | 0.0608 | 0.18 | 0.2010 | 0.2602 | 0.44 | 0.0091 | 0.0125 | 0.47 | 0.0160 | 0.0214 | 0.46 |
|  |  | All       | 0.0788 | 0.0596 | 0.19 | 0.1993 | 0.2572 | 0.44 | 0.0052 | 0.0128 | 0.68 | 0.0107 | 0.0224 | 0.64 |

PCT: plateletcrit. IVW: inverse variance weighting. SNP: single nucleotide polymorphism. se: standard error.



**Table S35. Summary of MVMR sensitivity analyses adjusting for smoking, drinking, educational attainment and household income concurrently, related to Figure 3 and STAR Methods.**

| Exposure                    | Outcome                     | n of SNPs | OR (95% CI)       | <i>p</i> -value       |
|-----------------------------|-----------------------------|-----------|-------------------|-----------------------|
| Parkinson's disease         | Platelet distribution width | 87        | 1.00 (0.98, 1.02) | 0.97                  |
| Platelet distribution width | Parkinson's disease         | 798       | 1.05 (1.01, 1.10) | 0.011                 |
| Stroke*                     | Plateletricit               | 40        | 1.12 (0.98, 1.27) | 0.093                 |
| Plateletricit               | Stroke                      | 1027      | 1.09 (1.05, 1.13) | 3.79×10 <sup>-7</sup> |

\*MR models utilised instrumental SNPs with stroke GWAS  $p < 1 \times 10^{-5}$ . MVMR: multivariate Mendelian randomisation. SNP: single nucleotide polymorphism. OR: odds ratio. CI: confidence interval.

**Table S37. FDR-significant (FDR < 0.05) SMR associations between platelet-based gene expression and BCT-NPD trait pairs with evidence for a putative causal relationship, related to Figure 4 and STAR Methods.**

| Gene                                | <i>RHD</i>             |                        | <i>FXYD5</i>           |                        | <i>MAP1LC3A</i>        |                        | <i>SRSF6</i>           |                        |
|-------------------------------------|------------------------|------------------------|------------------------|------------------------|------------------------|------------------------|------------------------|------------------------|
| Probe ID                            | ENSG00000187010        |                        | ENSG00000089327        |                        | ENSG00000101460        |                        | ENSG00000124193        |                        |
| Chromosome                          | 1                      |                        | 19                     |                        | 20                     |                        | 20                     |                        |
| Probe position (hg19)               | 24579435               |                        | 34629498               |                        | 32139351               |                        | 41087450               |                        |
| top SNP                             | rs72660908             |                        | rs1633915              |                        | rs2295444              |                        | rs3746532              |                        |
| Top SNP chromosome                  | 1                      |                        | 19                     |                        | 20                     |                        | 20                     |                        |
| Top SNP position (hg19)             | 25583610               |                        | 35649324               |                        | 33173883               |                        | 42099331               |                        |
| effect allele                       | G                      |                        | C                      |                        | T                      |                        | C                      |                        |
| non-effect allele                   | C                      |                        | G                      |                        | C                      |                        | A                      |                        |
| effect allele frequency             | 0.38                   |                        | 0.21                   |                        | 0.49                   |                        | 0.27                   |                        |
| Trait                               | PD                     | PDW                    | PD                     | PDW                    | PD                     | PDW                    | PD                     | PDW                    |
| Beta (GWAS)                         | 0.05                   | 0.02                   | -0.04                  | -0.04                  | 0.03                   | 0.01                   | -0.04                  | 0.01                   |
| Beta se (GWAS)                      | 0.01                   | 0.00                   | 0.01                   | 0.00                   | 0.01                   | 0.00                   | 0.01                   | 0.00                   |
| <i>p</i> -value (GWAS)              | $1.34 \times 10^{-4}$  | $1.30 \times 10^{-27}$ | $5.12 \times 10^{-4}$  | $1.70 \times 10^{-48}$ | $6.05 \times 10^{-4}$  | $8.90 \times 10^{-4}$  | $8.71 \times 10^{-4}$  | $5.60 \times 10^{-3}$  |
| Beta ( <i>cis</i> -eQTL)            | 0.54                   | 0.54                   | -0.35                  | -0.35                  | -0.19                  | -0.19                  | -0.31                  | -0.31                  |
| Beta se ( <i>cis</i> -eQTL)         | 0.05                   | 0.05                   | 0.04                   | 0.04                   | 0.02                   | 0.02                   | 0.03                   | 0.03                   |
| <i>p</i> -value ( <i>cis</i> -eQTL) | $4.53 \times 10^{-28}$ | $4.53 \times 10^{-28}$ | $1.73 \times 10^{-15}$ | $1.73 \times 10^{-15}$ | $1.63 \times 10^{-15}$ | $1.63 \times 10^{-15}$ | $1.09 \times 10^{-27}$ | $1.09 \times 10^{-27}$ |
| Beta (SMR)                          | 0.09                   | 0.04                   | 0.12                   | 0.12                   | -0.17                  | -0.04                  | 0.13                   | -0.02                  |
| Beta se (SMR)                       | 0.02                   | 0.01                   | 0.04                   | 0.02                   | 0.05                   | 0.01                   | 0.04                   | 0.01                   |
| <i>p</i> -value (SMR)               | $3.17 \times 10^{-4}$  | $1.06 \times 10^{-14}$ | $1.46 \times 10^{-3}$  | $2.71 \times 10^{-12}$ | $1.58 \times 10^{-3}$  | $2.16 \times 10^{-3}$  | $1.45 \times 10^{-3}$  | $7.28 \times 10^{-3}$  |
| FDR (SMR)                           | 0.015                  | $1.05 \times 10^{-12}$ | 0.047                  | $1.79 \times 10^{-10}$ | 0.049                  | 0.011                  | 0.047                  | 0.029                  |
| <i>p</i> -value (HEIDI)             | 0.11                   | 0.057                  | 0.078                  | 0.15                   | 0.17                   | 0.062                  | 0.43                   | 0.12                   |
| n of SNPs after HEIDI               | 18                     | 20                     | 10                     | 15                     | 20                     | 20                     | 20                     | 20                     |

BCT: blood cell trait. NPD: neurological and psychiatric disorder. PD: Parkinson's disease. PDW: platelet distribution width. SNP: single nucleotide polymorphism. se: standard error. GWAS: genome-wide association study. *cis*-eQTL: *cis*-expression quantitative trait loci. SMR: Summary-data-based Mendelian randomisation. HEIDI: HEterogeneity In Dependent Instruments. FDR: Benjamini-Hochberg false discovery rate.

**Table S38. FDR-significant (FDR < 0.05) SMR associations between brain-based gene expression and Parkinson's disease or stroke (for genes presented in Tables S36-37), related to Figure 4 and STAR Methods.**

|                                     |                        |                        |                        |                        |                         |                        |                         |
|-------------------------------------|------------------------|------------------------|------------------------|------------------------|-------------------------|------------------------|-------------------------|
| Gene                                | <i>RHD</i>             | <i>DNAJB4</i>          | <i>UBXN2A</i>          | <i>SFXN5</i>           | <i>GGCX</i>             | <i>COA5</i>            | <i>ARL8B</i>            |
| probe ID                            | ENSG00000187010        | ENSG00000162616        | ENSG00000173960        | ENSG00000144040        | ENSG00000115486         | ENSG00000183513        | ENSG00000134108         |
| Chromosome                          | 1                      | 1                      | 2                      | 2                      | 2                       | 2                      | 3                       |
| Probe position (hg19)               | 25627910               | 78464253               | 24188967               | 73235956               | 85781706                | 99220375               | 5193250                 |
| top SNP                             | rs72660908             | rs7514180              | rs12621152             | rs73945731             | rs6714157               | rs72823796             | rs6787725               |
| Top SNP chromosome                  | 1                      | 1                      | 2                      | 2                      | 2                       | 2                      | 3                       |
| Top SNP position (hg19)             | 25583610               | 78460935               | 24257682               | 73252335               | 85763274                | 99227812               | 5201054                 |
| effect allele                       | G                      | G                      | C                      | C                      | G                       | T                      | G                       |
| non-effect allele                   | C                      | A                      | T                      | T                      | A                       | C                      | A                       |
| effect allele frequency             | 0.39                   | 0.79                   | 0.83                   | 0.94                   | 0.50                    | 0.27                   | 0.67                    |
| Trait                               | Parkinson's disease     | Parkinson's disease    | Parkinson's disease     |
| Beta (GWAS)                         | 0.05                   | -0.05                  | 0.05                   | 0.06                   | -0.03                   | 0.03                   | -0.04                   |
| Beta se (GWAS)                      | 0.01                   | 0.01                   | 0.01                   | 0.02                   | 0.01                    | 0.01                   | 0.01                    |
| <i>p</i> -value (GWAS)              | $1.34 \times 10^{-4}$  | $8.08 \times 10^{-5}$  | $2.15 \times 10^{-4}$  | $1.79 \times 10^{-3}$  | $2.32 \times 10^{-3}$   | $2.32 \times 10^{-3}$  | $5.75 \times 10^{-4}$   |
| Beta ( <i>cis</i> -eQTL)            | -0.93                  | -0.45                  | 0.30                   | 0.69                   | 0.43                    | 0.45                   | 1.14                    |
| Beta se ( <i>cis</i> -eQTL)         | 0.08                   | 0.06                   | 0.05                   | 0.08                   | 0.04                    | 0.05                   | 0.03                    |
| <i>p</i> -value ( <i>cis</i> -eQTL) | $8.48 \times 10^{-28}$ | $4.39 \times 10^{-14}$ | $2.11 \times 10^{-9}$  | $1.66 \times 10^{-19}$ | $1.88 \times 10^{-29}$  | $1.09 \times 10^{-18}$ | $2.09 \times 10^{-291}$ |
| Beta (SMR)                          | -0.05                  | 0.10                   | 0.17                   | 0.09                   | -0.07                   | 0.07                   | -0.03                   |
| Beta se (SMR)                       | 0.01                   | 0.03                   | 0.06                   | 0.03                   | 0.02                    | 0.02                   | 0.01                    |
| <i>p</i> -value (SMR)               | $3.20 \times 10^{-4}$  | $4.87 \times 10^{-4}$  | $1.66 \times 10^{-3}$  | $3.13 \times 10^{-3}$  | $3.31 \times 10^{-3}$   | $3.97 \times 10^{-3}$  | $6.14 \times 10^{-4}$   |
| FDR (SMR)                           | $6.57 \times 10^{-3}$  | $6.57 \times 10^{-3}$  | $9.98 \times 10^{-3}$  | 0.012                  | 0.012                   | 0.013                  | $6.64 \times 10^{-3}$   |
| <i>p</i> -value (HEIDI)             | 0.18                   | 0.28                   | 0.037                  | 0.19                   | 0.71                    | 0.21                   | 0.073                   |
| n of SNPs after HEIDI               | 16                     | 20                     | 20                     | 10                     | 20                      | 19                     | 20                      |
| Gene                                | <i>PPM1M</i>           | <i>GLYCTK</i>          | <i>PTK2</i>            | <i>TSPAN4</i>          | <i>PLA2G4B</i>          | <i>RANBP10</i>         | <i>SOX15</i>            |
| probe ID                            | ENSG00000164088        | ENSG00000168237        | ENSG00000169398        | ENSG00000214063        | ENSG00000243708         | ENSG00000141084        | ENSG00000129194         |
| Chromosome                          | 3                      | 3                      | 8                      | 11                     | 15                      | 16                     | 17                      |
| Probe position (hg19)               | 52282227               | 52325188               | 141840157              | 854962                 | 42135159                | 67798780               | 7492902                 |
| top SNP                             | rs353547               | rs7622851              | rs7815898              | rs9704919              | rs28708888              | rs9938862              | rs12938899              |
| Top SNP chromosome                  | 3                      | 3                      | 8                      | 11                     | 15                      | 16                     | 17                      |
| Top SNP position (hg19)             | 52268866               | 52333671               | 141876541              | 842682                 | 41898885                | 67723801               | 7525546                 |
| effect allele                       | C                      | C                      | G                      | G                      | C                       | C                      | C                       |
| non-effect allele                   | T                      | G                      | C                      | A                      | A                       | T                      | T                       |
| effect allele frequency             | 0.58                   | 0.48                   | 0.43                   | 0.67                   | 0.38                    | 0.04                   | 0.82                    |
| Trait                               | Parkinson's disease     | Parkinson's disease    | Parkinson's disease     |
| Beta (GWAS)                         | -0.03                  | -0.04                  | 0.04                   | 0.03                   | 0.04                    | 0.06                   | -0.04                   |
| Beta se (GWAS)                      | 0.01                   | 0.01                   | 0.01                   | 0.01                   | 0.01                    | 0.02                   | 0.01                    |
| <i>p</i> -value (GWAS)              | $8.62 \times 10^{-4}$  | $6.92 \times 10^{-5}$  | $2.71 \times 10^{-4}$  | $1.40 \times 10^{-3}$  | $3.78 \times 10^{-4}$   | $2.34 \times 10^{-3}$  | $9.08 \times 10^{-4}$   |
| Beta ( <i>cis</i> -eQTL)            | 0.47                   | 0.28                   | -0.37                  | -0.42                  | 0.97                    | -0.84                  | 0.38                    |
| Beta se ( <i>cis</i> -eQTL)         | 0.04                   | 0.05                   | 0.05                   | 0.05                   | 0.03                    | 0.11                   | 0.06                    |
| <i>p</i> -value ( <i>cis</i> -eQTL) | $1.37 \times 10^{-36}$ | $5.57 \times 10^{-9}$  | $4.14 \times 10^{-15}$ | $2.73 \times 10^{-17}$ | $5.79 \times 10^{-261}$ | $1.41 \times 10^{-15}$ | $2.55 \times 10^{-10}$  |
| Beta (SMR)                          | -0.07                  | -0.13                  | -0.10                  | -0.08                  | 0.04                    | -0.08                  | -0.10                   |
| Beta se (SMR)                       | 0.02                   | 0.04                   | 0.03                   | 0.03                   | 0.01                    | 0.03                   | 0.04                    |

|                                     |                         |                        |                        |                         |                        |                        |                       |
|-------------------------------------|-------------------------|------------------------|------------------------|-------------------------|------------------------|------------------------|-----------------------|
| <i>p</i> -value (SMR)               | 1.32×10 <sup>-3</sup>   | 1.02×10 <sup>-3</sup>  | 9.26×10 <sup>-4</sup>  | 2.83×10 <sup>-3</sup>   | 3.92×10 <sup>-4</sup>  | 4.46×10 <sup>-3</sup>  | 3.42×10 <sup>-3</sup> |
| FDR (SMR)                           | 8.94×10 <sup>-3</sup>   | 7.83×10 <sup>-3</sup>  | 7.83×10 <sup>-3</sup>  | 0.012                   | 6.57×10 <sup>-3</sup>  | 0.013                  | 0.012                 |
| <i>p</i> -value (HEIDI)             | 0.08                    | 0.032                  | 0.96                   | 0.44                    | 0.15                   | 0.69                   | 0.25                  |
| n of SNPs after HEIDI               | 20                      | 20                     | 20                     | 20                      | 20                     | 20                     | 20                    |
| Gene                                | <i>PDCD5</i>            | <i>FXYD5</i>           | <i>MGAT3</i>           | <i>CLBA1</i>            | <i>IVD</i>             | <i>RMCI</i>            |                       |
| probe ID                            | ENSG00000105185         | ENSG00000089327        | ENSG00000128268        | ENSG00000140104         | ENSG00000128928        | ENSG00000141452        |                       |
| Chromosome                          | 19                      | 19                     | 22                     | 14                      | 15                     | 18                     |                       |
| Probe position (hg19)               | 33075166                | 35653209               | 39870774               | 105464465               | 40712916               | 21097609               |                       |
| top SNP                             | rs8182578               | rs9807816              | rs5750828              | rs2033932               | rs7165012              | rs1618725              |                       |
| Top SNP chromosome                  | 19                      | 19                     | 22                     | 14                      | 15                     | 18                     |                       |
| Top SNP position (hg19)             | 33056477                | 35684944               | 39835083               | 105447075               | 40654038               | 21126952               |                       |
| effect allele                       | A                       | G                      | C                      | C                       | G                      | T                      |                       |
| non-effect allele                   | G                       | T                      | T                      | T                       | A                      | C                      |                       |
| effect allele frequency             | 0.40                    | 0.79                   | 0.70                   | 0.79                    | 0.53                   | 0.47                   |                       |
| Trait                               | Parkinson's disease     | Parkinson's disease    | Parkinson's disease    | Stroke                  | Stroke                 | Stroke                 |                       |
| Beta (GWAS)                         | -0.04                   | 0.04                   | -0.03                  | -0.04                   | -0.03                  | -0.02                  |                       |
| Beta se (GWAS)                      | 0.01                    | 0.01                   | 0.01                   | 0.01                    | 0.01                   | 0.01                   |                       |
| <i>p</i> -value (GWAS)              | 4.73×10 <sup>-5</sup>   | 2.24×10 <sup>-3</sup>  | 3.83×10 <sup>-3</sup>  | 3.11×10 <sup>-3</sup>   | 2.59×10 <sup>-3</sup>  | 0.012                  |                       |
| Beta ( <i>cis</i> -eQTL)            | 1.02                    | -0.42                  | 0.33                   | -1.27                   | 0.48                   | 0.47                   |                       |
| Beta se ( <i>cis</i> -eQTL)         | 0.03                    | 0.06                   | 0.05                   | 0.03                    | 0.04                   | 0.04                   |                       |
| <i>p</i> -value ( <i>cis</i> -eQTL) | 1.03×10 <sup>-288</sup> | 4.88×10 <sup>-13</sup> | 4.45×10 <sup>-11</sup> | 5.73×10 <sup>-305</sup> | 6.18×10 <sup>-40</sup> | 3.83×10 <sup>-36</sup> |                       |
| Beta (SMR)                          | -0.04                   | -0.09                  | -0.10                  | 0.03                    | -0.06                  | -0.05                  |                       |
| Beta se (SMR)                       | 0.01                    | 0.03                   | 0.04                   | 0.01                    | 0.02                   | 0.02                   |                       |
| <i>p</i> -value (SMR)               | 5.06×10 <sup>-5</sup>   | 4.88×10 <sup>-3</sup>  | 8.22×10 <sup>-3</sup>  | 3.26×10 <sup>-3</sup>   | 3.44×10 <sup>-3</sup>  | 0.014                  |                       |
| FDR (SMR)                           | 2.73×10 <sup>-3</sup>   | 0.014                  | 0.019                  | 0.012                   | 0.012                  | 0.031                  |                       |
| <i>p</i> -value (HEIDI)             | 0.94                    | 0.65                   | 0.11                   | 0.75                    | 0.13                   | 0.68                   |                       |
| n of SNPs after HEIDI               | 20                      | 11                     | 18                     | 20                      | 20                     | 20                     |                       |

SNP: single nucleotide polymorphism. se: standard error. GWAS: genome-wide association study. *cis*-eQTL: *cis*-expression quantitative trait loci. SMR: Summary-data-based Mendelian randomisation. HEIDI: HETerogeneity In Dependent Instruments. FDR: Benjamini-Hochberg false discovery rate.

**Table S45. Bonferroni-significant SMR associations between brain-based gene expression and specific NPDs shown in Tables S43-44, related to Figure 5 and STAR Methods.**

| Gene                                | <i>GNL3</i>            | <i>AC100854.1</i>      | <i>OGFOD2</i>          | <i>GATAD2A</i>         |
|-------------------------------------|------------------------|------------------------|------------------------|------------------------|
| probe ID                            | ENSG00000163938        | ENSG00000254352        | ENSG00000111325        | ENSG00000167491        |
| Chromosome                          | 3                      | 8                      | 12                     | 19                     |
| Listed table                        | S36                    | S35                    | S35 & S36              | S35 & S36              |
| Probe position (hg19)               | 52721840               | 79636201               | 123461858              | 19558189               |
| top SNP                             | rs7646741              | rs2717538              | rs1727309              | rs8101499              |
| Top SNP chromosome                  | 3                      | 8                      | 12                     | 19                     |
| Top SNP position (hg19)             | 52785238               | 79633149               | 123658258              | 19476984               |
| effect allele                       | A                      | A                      | G                      | A                      |
| non-effect allele                   | G                      | G                      | A                      | G                      |
| effect allele frequency             | 0.48                   | 0.29                   | 0.78                   | 0.33                   |
| Trait                               | Schizophrenia          | Multiple sclerosis     | Schizophrenia          | Schizophrenia          |
| Beta (GWAS)                         | 0.08                   | 0.10                   | -0.07                  | 0.07                   |
| Beta se (GWAS)                      | 0.01                   | 0.02                   | 0.01                   | 0.01                   |
| <i>p</i> -value (GWAS)              | $2.19 \times 10^{-17}$ | $1.46 \times 10^{-8}$  | $5.53 \times 10^{-11}$ | $4.57 \times 10^{-15}$ |
| Beta ( <i>cis</i> -eQTL)            | 0.58                   | -0.68                  | -0.38                  | -0.31                  |
| Beta se ( <i>cis</i> -eQTL)         | 0.05                   | 0.08                   | 0.05                   | 0.04                   |
| <i>p</i> -value ( <i>cis</i> -eQTL) | $1.70 \times 10^{-36}$ | $7.39 \times 10^{-16}$ | $4.11 \times 10^{-13}$ | $2.08 \times 10^{-16}$ |
| Beta (SMR)                          | 0.13                   | -0.15                  | 0.19                   | -0.24                  |
| Beta se (SMR)                       | 0.02                   | 0.03                   | 0.04                   | 0.04                   |
| <i>p</i> -value (SMR)               | $2.11 \times 10^{-12}$ | $3.55 \times 10^{-6}$  | $1.10 \times 10^{-6}$  | $1.51 \times 10^{-8}$  |
| <i>p</i> -value (HEIDI)             | 0.43                   | 0.38                   | 0.053                  | 0.40                   |
| n of SNPs after HEIDI               | 20                     | 16                     | 20                     | 20                     |

NPD: neurological and psychiatric disorder. SNP: single nucleotide polymorphism. se: standard error. GWAS: genome-wide association study. *cis*-eQTL: *cis*-expression quantitative trait loci. SMR: Summary-data-based Mendelian randomisation. HEIDI: HEterogeneity In Dependent Instruments.

**Table S46. Bonferroni-significant SMR associations between brain-based DNA methylation and gene expression for genes shown in Table S45, related to Figure 5 and STAR Methods.**

|                                     |                        |                        |                        |                        |                        |                        |
|-------------------------------------|------------------------|------------------------|------------------------|------------------------|------------------------|------------------------|
| Exp ID (mQTL)                       | cg14845053             | cg02792780             | cg07148594             | cg16977858             | cg17372223             | cg05564831             |
| Exp chromosome                      | 3                      | 3                      | 3                      | 3                      | 3                      | 3                      |
| Exp probe position (hg19)           | 52276132               | 52529341               | 52565909               | 52567510               | 52568218               | 52568323               |
| Out ID (eQTL)                       | ENSG00000163938        | ENSG00000163938        | ENSG00000163938        | ENSG00000163938        | ENSG00000163938        | ENSG00000163938        |
| Out Chromosome                      | 3                      | 3                      | 3                      | 3                      | 3                      | 3                      |
| Out Gene                            | <i>GNL3</i>            | <i>GNL3</i>            | <i>GNL3</i>            | <i>GNL3</i>            | <i>GNL3</i>            | <i>GNL3</i>            |
| Out probe position (hg19)           | 52721840               | 52721840               | 52721840               | 52721840               | 52721840               | 52721840               |
| Top SNP                             | rs610060               | rs1570                 | rs4282054              | rs7639267              | rs12489828             | rs12489828             |
| Top SNP chromosome                  | 3                      | 3                      | 3                      | 3                      | 3                      | 3                      |
| Top SNP position (hg19)             | 52273421               | 52586682               | 52566065               | 52568805               | 52567014               | 52567014               |
| effect allele                       | A                      | T                      | T                      | G                      | G                      | G                      |
| non-effect allele                   | G                      | A                      | C                      | T                      | T                      | T                      |
| effect allele frequency             | 0.48                   | 0.57                   | 0.44                   | 0.43                   | 0.45                   | 0.45                   |
| Beta ( <i>cis</i> -eQTL)            | 0.46                   | 0.49                   | 0.49                   | 0.50                   | 0.43                   | 0.43                   |
| Beta se ( <i>cis</i> -eQTL)         | 0.05                   | 0.05                   | 0.05                   | 0.05                   | 0.05                   | 0.05                   |
| <i>p</i> -value ( <i>cis</i> -eQTL) | $7.02 \times 10^{-22}$ | $2.27 \times 10^{-24}$ | $7.77 \times 10^{-25}$ | $3.08 \times 10^{-26}$ | $5.48 \times 10^{-19}$ | $5.48 \times 10^{-19}$ |
| Beta (mQTL)                         | 0.40                   | 0.36                   | 0.59                   | 0.37                   | -0.40                  | -0.51                  |
| Beta se (mQTL)                      | 0.06                   | 0.06                   | 0.04                   | 0.04                   | 0.04                   | 0.04                   |
| <i>p</i> -value (mQTL)              | $3.80 \times 10^{-11}$ | $7.14 \times 10^{-9}$  | $3.25 \times 10^{-47}$ | $4.05 \times 10^{-17}$ | $9.53 \times 10^{-21}$ | $2.18 \times 10^{-35}$ |
| Beta (SMR)                          | 1.14                   | 1.34                   | 0.83                   | 1.38                   | -1.07                  | -0.83                  |
| Beta se (SMR)                       | 0.21                   | 0.27                   | 0.10                   | 0.21                   | 0.17                   | 0.11                   |
| <i>p</i> -value (SMR)               | $5.11 \times 10^{-8}$  | $4.85 \times 10^{-7}$  | $5.35 \times 10^{-17}$ | $4.45 \times 10^{-11}$ | $1.16 \times 10^{-10}$ | $4.68 \times 10^{-13}$ |
| <i>p</i> -value (HEIDI)             | 0.12                   | 0.26                   | 0.019                  | 0.091                  | 0.040                  | 0.019                  |
| n of SNPs after HEIDI               | 14                     | 14                     | 20                     | 14                     | 12                     | 20                     |
| Exp ID (mQTL)                       | cg24629711             | cg23815702             | cg17117718             | cg22694191             | cg14449575             | cg13364410             |
| Exp chromosome                      | 3                      | 3                      | 17                     | 19                     | 19                     | 19                     |
| Exp probe position (hg19)           | 52869263               | 52869738               | 43663208               | 19373575               | 19373743               | 19373755               |
| Out ID (eQTL)                       | ENSG00000163938        | ENSG00000163938        | ENSG00000264070        | ENSG00000167491        | ENSG00000167491        | ENSG00000167491        |
| Out Chromosome                      | 3                      | 3                      | 17                     | 19                     | 19                     | 19                     |
| Out Gene                            | <i>GNL3</i>            | <i>GNL3</i>            | <i>DND1P1</i>          | <i>GATAD2A</i>         | <i>GATAD2A</i>         | <i>GATAD2A</i>         |
| Out probe position (hg19)           | 52721840               | 52721840               | 43663766               | 19558189               | 19558189               | 19558189               |
| Top SNP                             | rs2256332              | rs6445541              | rs1724390              | rs10426780             | rs2074295              | rs2074295              |
| Top SNP chromosome                  | 3                      | 3                      | 17                     | 19                     | 19                     | 19                     |
| Top SNP position (hg19)             | 52855865               | 52880128               | 43663247               | 19375883               | 19369435               | 19369435               |
| effect allele                       | G                      | G                      | A                      | C                      | A                      | A                      |
| non-effect allele                   | A                      | T                      | C                      | T                      | G                      | G                      |
| effect allele frequency             | 0.61                   | 0.60                   | 0.24                   | 0.32                   | 0.79                   | 0.79                   |
| Beta ( <i>cis</i> -eQTL)            | 0.39                   | 0.42                   | 0.60                   | -0.29                  | 0.27                   | 0.27                   |
| Beta se ( <i>cis</i> -eQTL)         | 0.05                   | 0.05                   | 0.11                   | 0.04                   | 0.04                   | 0.04                   |
| <i>p</i> -value ( <i>cis</i> -eQTL) | $3.76 \times 10^{-15}$ | $2.86 \times 10^{-17}$ | $3.60 \times 10^{-8}$  | $1.00 \times 10^{-14}$ | $1.75 \times 10^{-10}$ | $1.75 \times 10^{-10}$ |
| Beta (mQTL)                         | -0.57                  | -0.36                  | 1.40                   | -0.31                  | 0.50                   | 0.44                   |
| Beta se (mQTL)                      | 0.06                   | 0.04                   | 0.05                   | 0.04                   | 0.05                   | 0.05                   |

|                                     |                        |                        |                         |                        |                        |                        |
|-------------------------------------|------------------------|------------------------|-------------------------|------------------------|------------------------|------------------------|
| <i>p</i> -value (mQTL)              | $1.91 \times 10^{-23}$ | $1.90 \times 10^{-16}$ | $1.08 \times 10^{-203}$ | $2.76 \times 10^{-12}$ | $1.11 \times 10^{-25}$ | $4.47 \times 10^{-20}$ |
| Beta (SMR)                          | -0.68                  | -1.15                  | 0.43                    | 0.94                   | 0.54                   | 0.61                   |
| Beta se (SMR)                       | 0.11                   | 0.20                   | 0.08                    | 0.18                   | 0.10                   | 0.12                   |
| <i>p</i> -value (SMR)               | $6.59 \times 10^{-10}$ | $3.73 \times 10^{-9}$  | $5.92 \times 10^{-8}$   | $2.14 \times 10^{-7}$  | $5.03 \times 10^{-8}$  | $1.61 \times 10^{-7}$  |
| <i>p</i> -value (HEIDI)             | 0.079                  | 0.11                   | 0.046                   | 0.031                  | 0.028                  | 0.14                   |
| n of SNPs after HEIDI               | 12                     | 20                     | 16                      | 19                     | 20                     | 15                     |
| Exp ID (mQTL)                       | cg14021871             | cg01262667             | cg17414380              | cg26162025             | cg26732615             |                        |
| Exp chromosome                      | 19                     | 19                     | 19                      | 19                     | 19                     |                        |
| Exp probe position (hg19)           | 19384381               | 19385393               | 19431394                | 19616502               | 19648335               |                        |
| Out ID (eQTL)                       | ENSG00000167491        | ENSG00000167491        | ENSG00000167491         | ENSG00000167491        | ENSG00000167491        |                        |
| Out Chromosome                      | 19                     | 19                     | 19                      | 19                     | 19                     |                        |
| Out Gene                            | <i>GATAD2A</i>         | <i>GATAD2A</i>         | <i>GATAD2A</i>          | <i>GATAD2A</i>         | <i>GATAD2A</i>         |                        |
| Out probe position (hg19)           | 19558189               | 19558189               | 19558189                | 19558189               | 19558189               |                        |
| Top SNP                             | rs2905425              | rs2074303              | rs7247309               | rs4808198              | rs4808208              |                        |
| Top SNP chromosome                  | 19                     | 19                     | 19                      | 19                     | 19                     |                        |
| Top SNP position (hg19)             | 19475717               | 19381755               | 19439631                | 19533630               | 19650096               |                        |
| effect allele                       | G                      | T                      | A                       | C                      | G                      |                        |
| non-effect allele                   | C                      | C                      | T                       | T                      | A                      |                        |
| effect allele frequency             | 0.32                   | 0.32                   | 0.33                    | 0.33                   | 0.32                   |                        |
| Beta ( <i>cis</i> -eQTL)            | -0.30                  | -0.29                  | -0.29                   | -0.29                  | -0.28                  |                        |
| Beta se ( <i>cis</i> -eQTL)         | 0.04                   | 0.04                   | 0.04                    | 0.04                   | 0.04                   |                        |
| <i>p</i> -value ( <i>cis</i> -eQTL) | $4.23 \times 10^{-15}$ | $2.00 \times 10^{-14}$ | $2.02 \times 10^{-14}$  | $8.08 \times 10^{-15}$ | $1.66 \times 10^{-13}$ |                        |
| Beta (mQTL)                         | -0.56                  | 1.16                   | 0.42                    | 0.70                   | 0.74                   |                        |
| Beta se (mQTL)                      | 0.06                   | 0.03                   | 0.04                    | 0.06                   | 0.04                   |                        |
| <i>p</i> -value (mQTL)              | $4.84 \times 10^{-19}$ | 0                      | $3.51 \times 10^{-22}$  | $9.86 \times 10^{-32}$ | $3.90 \times 10^{-81}$ |                        |
| Beta (SMR)                          | 0.53                   | -0.25                  | -0.68                   | -0.42                  | -0.37                  |                        |
| Beta se (SMR)                       | 0.09                   | 0.03                   | 0.11                    | 0.06                   | 0.05                   |                        |
| <i>p</i> -value (SMR)               | $3.84 \times 10^{-9}$  | $5.45 \times 10^{-14}$ | $1.94 \times 10^{-9}$   | $9.53 \times 10^{-11}$ | $6.07 \times 10^{-12}$ |                        |
| <i>p</i> -value (HEIDI)             | 0.24                   | 0.025                  | 0.13                    | 0.029                  | 0.21                   |                        |
| n of SNPs after HEIDI               | 20                     | 20                     | 17                      | 19                     | 20                     |                        |

SNP: single nucleotide polymorphism. se: standard error. GWAS: genome-wide association study. *cis*-eQTL: *cis*-expression quantitative trait loci. mQTL: DNA methylation quantitative trait loci. SMR: Summary-data-based Mendelian randomisation. HEIDI: HEterogeneity In Dependent Instruments.

**Table S47. Bonferroni-significant SMR associations between brain-based DNA methylation (shown in Table S46) and specific NPDs (shown in Table S45), related to Figure 5 and STAR Methods.**

| probe ID                | cg07148594             | cg16977858             | cg17372223             | cg05564831             | cg24629711             | cg14449575             | cg13364410             | cg14021871             | cg17414380             | cg26162025             | cg26732615             |
|-------------------------|------------------------|------------------------|------------------------|------------------------|------------------------|------------------------|------------------------|------------------------|------------------------|------------------------|------------------------|
| Chromosome              | 3                      | 3                      | 3                      | 3                      | 3                      | 19                     | 19                     | 19                     | 19                     | 19                     | 19                     |
| Probe position (hg19)   | 52565909               | 52567510               | 52568218               | 52568323               | 52869263               | 19373743               | 19373755               | 19384381               | 19431394               | 19616502               | 19648335               |
| Top SNP chromosome      | rs4282054              | rs7639267              | rs12489828             | rs12489828             | rs2256332              | rs2074295              | rs2074295              | rs2905425              | rs7247309              | rs4808198              | rs4808208              |
| Top SNP position (hg19) | 52566065               | 52568805               | 52567014               | 52567014               | 52855865               | 19369435               | 19369435               | 19475717               | 19439631               | 19533630               | 19650096               |
| effect allele           | T                      | G                      | G                      | G                      | G                      | A                      | A                      | G                      | A                      | C                      | G                      |
| non-effect allele       | C                      | T                      | T                      | T                      | A                      | G                      | G                      | C                      | T                      | T                      | A                      |
| effect allele frequency | 0.44                   | 0.43                   | 0.45                   | 0.45                   | 0.61                   | 0.79                   | 0.79                   | 0.32                   | 0.33                   | 0.33                   | 0.32                   |
| Trait                   | Schizophrenia          |
| Beta (GWAS)             | 0.06                   | 0.07                   | 0.07                   | 0.07                   | 0.07                   | -0.06                  | -0.06                  | 0.07                   | 0.07                   | 0.07                   | 0.07                   |
| Beta se (GWAS)          | 0.01                   | 0.01                   | 0.01                   | 0.01                   | 0.01                   | 0.01                   | 0.01                   | 0.01                   | 0.01                   | 0.01                   | 0.01                   |
| <i>p</i> -value (GWAS)  | $3.94 \times 10^{-13}$ | $2.47 \times 10^{-13}$ | $2.51 \times 10^{-13}$ | $2.51 \times 10^{-13}$ | $4.53 \times 10^{-16}$ | $1.02 \times 10^{-9}$  | $1.02 \times 10^{-9}$  | $4.78 \times 10^{-15}$ | $1.47 \times 10^{-13}$ | $1.43 \times 10^{-15}$ | $2.36 \times 10^{-14}$ |
| Beta (mQTL)             | 0.59                   | 0.37                   | -0.40                  | -0.51                  | -0.57                  | 0.50                   | 0.44                   | -0.56                  | 0.42                   | 0.70                   | 0.74                   |
| Beta se (mQTL)          | 0.04                   | 0.04                   | 0.04                   | 0.04                   | 0.06                   | 0.05                   | 0.05                   | 0.06                   | 0.04                   | 0.06                   | 0.04                   |
| <i>p</i> -value (mQTL)  | $3.25 \times 10^{-47}$ | $4.05 \times 10^{-17}$ | $9.53 \times 10^{-21}$ | $2.18 \times 10^{-35}$ | $1.91 \times 10^{-23}$ | $1.11 \times 10^{-25}$ | $4.47 \times 10^{-20}$ | $4.84 \times 10^{-19}$ | $3.51 \times 10^{-22}$ | $9.86 \times 10^{-32}$ | $3.90 \times 10^{-81}$ |
| Beta (SMR)              | 0.11                   | 0.18                   | -0.16                  | -0.13                  | -0.13                  | -0.13                  | -0.15                  | -0.13                  | 0.16                   | 0.11                   | 0.10                   |
| Beta se (SMR)           | 0.02                   | 0.03                   | 0.03                   | 0.02                   | 0.02                   | 0.02                   | 0.03                   | 0.02                   | 0.03                   | 0.02                   | 0.01                   |
| <i>p</i> -value (SMR)   | $9.37 \times 10^{-11}$ | $3.49 \times 10^{-8}$  | $8.74 \times 10^{-19}$ | $3.08 \times 10^{-10}$ | $3.22 \times 10^{-10}$ | $1.21 \times 10^{-7}$  | $3.43 \times 10^{-7}$  | $4.37 \times 10^{-9}$  | $4.56 \times 10^{-9}$  | $4.78 \times 10^{-11}$ | $1.77 \times 10^{-12}$ |
| <i>p</i> -value (HEIDI) | 0.064                  | 0.23                   | 0.034                  | 0.033                  | 0.25                   | 0.019                  | 0.16                   | 0.26                   | 0.33                   | 0.012                  | 0.19                   |
| n of SNPs after HEIDI   | 20                     | 14                     | 12                     | 20                     | 12                     | 20                     | 15                     | 20                     | 17                     | 19                     | 20                     |

NPD: neurological and psychiatric disorder. SNP: single nucleotide polymorphism. se: standard error. GWAS: genome-wide association study. mQTL: DNA methylation quantitative trait loci. SMR: Summary-data-based Mendelian randomisation. HEIDI: HEterogeneity In Dependent Instruments.



**Table S48. Estimated correlations among significant brain-based DNA methylation probes shown in Table S47, related to Figure 5 and STAR Methods.**

| correlation | cg07148594 | cg16977858 | cg17372223 | cg05564831 | cg24629711 | cg14449575 | cg13364410 | cg14021871 | cg17414380 | cg26162025 | cg26732615 |
|-------------|------------|------------|------------|------------|------------|------------|------------|------------|------------|------------|------------|
| cg07148594  | 1.00       | 1.00       | -0.96      | -0.96      | -0.85      | -          | -          | -          | -          | -          | -          |
| cg16977858  | 1.00       | 1.00       | -0.96      | -0.96      | -0.84      | -          | -          | -          | -          | -          | -          |
| cg17372223  | -0.96      | -0.96      | 1.00       | 1.00       | 0.88       | -          | -          | -          | -          | -          | -          |
| cg05564831  | -0.96      | -0.96      | 1.00       | 1.00       | 0.88       | -          | -          | -          | -          | -          | -          |
| cg24629711  | -0.85      | -0.84      | 0.88       | 0.88       | 1.00       | -          | -          | -          | -          | -          | -          |
| cg14449575  | -          | -          | -          | -          | -          | 1.00       | 1.00       | 0.79       | -0.81      | -0.77      | -0.82      |
| cg13364410  | -          | -          | -          | -          | -          | 1.00       | 1.00       | 0.80       | -0.81      | -0.77      | -0.82      |
| cg14021871  | -          | -          | -          | -          | -          | 0.79       | 0.80       | 1.00       | -0.98      | -0.97      | -0.97      |
| cg17414380  | -          | -          | -          | -          | -          | -0.81      | -0.81      | -0.98      | 1.00       | 0.97       | 0.97       |
| cg26162025  | -          | -          | -          | -          | -          | -0.77      | -0.77      | -0.97      | 0.97       | 1.00       | 0.99       |
| cg26732615  | -          | -          | -          | -          | -          | -0.82      | -0.82      | -0.97      | 0.97       | 0.99       | 1.00       |

**Table S49. Candidate gene lists for specific pairs of traits used in gene set enrichment analysis, related to Figure 5 and STAR Methods.**

| Trait Pair                                                            | Gene list                                                                                               |
|-----------------------------------------------------------------------|---------------------------------------------------------------------------------------------------------|
| Multiple sclerosis - Eosinophil count                                 | <i>CD5 FCRL2 FCRL3 MYO19 PRXL2B ZNHIT3</i>                                                              |
| Multiple sclerosis - Lymphocyte count                                 | <i>ABCB9 AC100854.1 BACH2 BANF1 GPR25 TNFSF14 ZMIZ1</i>                                                 |
| Multiple sclerosis - Neutrophil percentage of white cells             | <i>ABCB9 AC100854.1 AH11 BACH2 SCO2 ZC2HC1A ZMIZ1</i>                                                   |
| Multiple sclerosis - Red cell distribution width                      | <i>BANF1 GGNBP2 MAST3 MYO19 TYMP ZNHIT3</i>                                                             |
| Schizophrenia - Eosinophil count/Eosinophil percentage of white cells | <i>AC005829.1 AC091132.1 GATAD2A MAPK8IP1P1 MAPK8IP1P2</i>                                              |
| Schizophrenia - Lymphocyte count                                      | <i>ABCB9 AL360001.33 DDHD2 KANSL1-AS1 LRRC37A2 MAPK8IP1P1 RABEP1 WHSC1L1 ZNF664</i>                     |
| Schizophrenia - Lymphocyte percentage of white cells                  | <i>AC005829.1 AC091132.16 DDHD2 DND1P1 KANSL1-AS1 MAPK8IP1P1 MAPK8IP1P2 PPP2R3C</i>                     |
| Schizophrenia - Monocyte percentage of white cells                    | <i>AC005829.1 EP300 GATAD2A MAPIA STRCP1</i>                                                            |
| Schizophrenia - Neutrophil percentage of white cells                  | <i>ABCB9 AC005829.1 AC091132.16 MAPK3 MAPK8IP1P1 MAPK8IP1P2</i>                                         |
| Schizophrenia - Reticulocyte count                                    | <i>ABCB9 ARL6IP4 GATAD2A OGFOD2 ZNF664</i>                                                              |
| Schizophrenia - Reticulocyte fraction of red cells                    | <i>ABCB9 AC091132.1 AC091132.16 ARL6IP4 GATAD2A INO80E LRRC37A2 MAPK8IP1P1 MAPK8IP1P2 OGFOD2 ZNF664</i> |

**Table S50. Summary of significant pathways identified in the gene set enrichment analysis using ShinyGO, related to Figure 5 and STAR Methods.**

| Trait Pair                                           | Pathway database       | Pathway                                      | Enrichment FDR        | n of Genes | n of Pathway Genes | Enrichment Fold | Involved Genes         |
|------------------------------------------------------|------------------------|----------------------------------------------|-----------------------|------------|--------------------|-----------------|------------------------|
| Schizophrenia - Monocyte percentage of white cells   | GO: Molecular Function | Tau protein binding                          | $4.68 \times 10^{-4}$ | 2          | 45                 | 337.72          | <i>EP300 MAP1A</i>     |
| Schizophrenia - Reticulocyte fraction of red cells   | GO: Cellular Component | SWI/SNF superfamily-type complex             | $5.87 \times 10^{-3}$ | 2          | 94                 | 69.29           | <i>GATAD2A INO80E</i>  |
| Schizophrenia - Reticulocyte fraction of red cells   | GO: Cellular Component | ATPase complex                               | $5.87 \times 10^{-3}$ | 2          | 95                 | 68.56           | <i>GATAD2A INO80E</i>  |
| Schizophrenia - Lymphocyte count                     | GO: Cellular Component | Centrosome                                   | $6.52 \times 10^{-3}$ | 2          | 658                | 34.64           | <i>DDHD2 PPP2R3C</i>   |
| Schizophrenia - Lymphocyte count                     | GO: Cellular Component | Microtubule organizing center                | $6.52 \times 10^{-3}$ | 2          | 868                | 26.26           | <i>DDHD2 PPP2R3C</i>   |
| Schizophrenia - Monocyte percentage of white cells   | GO: Molecular Function | Protein-macromolecule adaptor activity       | $8.48 \times 10^{-3}$ | 2          | 283                | 53.70           | <i>MAP1A GATAD2A</i>   |
| Schizophrenia - Monocyte percentage of white cells   | GO: Molecular Function | Molecular adaptor activity                   | $8.48 \times 10^{-3}$ | 2          | 353                | 43.05           | <i>MAP1A GATAD2A</i>   |
| Schizophrenia - Lymphocyte count                     | GO: Cellular Component | Microtubule cytoskeleton                     | 0.011                 | 2          | 1391               | 16.39           | <i>DDHD2 PPP2R3C</i>   |
| Schizophrenia - Neutrophil percentage of white cells | GO: Molecular Function | ATP binding                                  | 0.014                 | 2          | 1662               | 13.72           | <i>MAPK3 ABCB9</i>     |
| Schizophrenia - Neutrophil percentage of white cells | GO: Molecular Function | Adenyl nucleotide binding                    | 0.014                 | 2          | 1743               | 13.08           | <i>MAPK3 ABCB9</i>     |
| Schizophrenia - Neutrophil percentage of white cells | GO: Molecular Function | Adenyl ribonucleotide binding                | 0.014                 | 2          | 1730               | 13.18           | <i>MAPK3 ABCB9</i>     |
| Schizophrenia - Lymphocyte count                     | GO: Cellular Component | Golgi apparatus                              | 0.014                 | 2          | 1812               | 12.58           | <i>DDHD2 PPP2R3C</i>   |
| Schizophrenia - Monocyte percentage of white cells   | GO: Cellular Component | Transcription regulator complex              | 0.016                 | 2          | 465                | 32.68           | <i>EP300 GATAD2A</i>   |
| Schizophrenia - Monocyte percentage of white cells   | GO: Molecular Function | Zinc ion binding                             | 0.016                 | 2          | 942                | 16.13           | <i>EP300 GATAD2A</i>   |
| Schizophrenia - Monocyte percentage of white cells   | GO: Molecular Function | Cytoskeletal protein binding                 | 0.017                 | 2          | 1050               | 14.47           | <i>EP300 MAP1A</i>     |
| Schizophrenia - Monocyte percentage of white cells   | GO: Molecular Function | Transition metal ion binding                 | 0.019                 | 2          | 1238               | 12.28           | <i>EP300 GATAD2A</i>   |
| Multiple sclerosis - Eosinophil count                | GO: Cellular Component | Cell surface                                 | 0.020                 | 3          | 960                | 11.87           | <i>CD5 FCRL2 FCRL3</i> |
| Multiple sclerosis - Eosinophil count                | GO: Molecular Function | Phosphatase binding                          | 0.023                 | 2          | 224                | 33.92           | <i>FCRL2 FCRL3</i>     |
| Multiple sclerosis - Eosinophil count                | GO: Molecular Function | Protein phosphatase binding                  | 0.023                 | 2          | 170                | 44.70           | <i>FCRL2 FCRL3</i>     |
| Schizophrenia - Monocyte percentage of white cells   | GO: Cellular Component | Nuclear protein-containing complex           | 0.031                 | 2          | 1379               | 11.02           | <i>EP300 GATAD2A</i>   |
| Schizophrenia - Monocyte percentage of white cells   | GO: Cellular Component | Catalytic complex                            | 0.031                 | 2          | 1540               | 9.87            | <i>EP300 GATAD2A</i>   |
| Schizophrenia - Lymphocyte count                     | GO: Biological Process | Positive regulation of developmental process | 0.032                 | 2          | 1373               | 16.60           | <i>DDHD2 PPP2R3C</i>   |
| Multiple sclerosis - Red cell distribution width     | GO: Biological Process | Mitochondrion organization                   | 0.040                 | 2          | 605                | 12.56           | <i>TYMP MYO19</i>      |
| Multiple sclerosis - Red cell distribution width     | GO: Biological Process | Organelle fission                            | 0.040                 | 2          | 584                | 13.01           | <i>BANF1 MYO19</i>     |
| Schizophrenia - Reticulocyte fraction of red cells   | GO: Cellular Component | Nuclear speck                                | 0.041                 | 2          | 481                | 13.54           | <i>GATAD2A ARL6IP4</i> |
| Schizophrenia - Monocyte percentage of white cells   | GO: Biological Process | Learning or memory                           | 0.041                 | 2          | 273                | 55.67           | <i>EP300 MAP1A</i>     |
| Schizophrenia - Monocyte percentage of white cells   | GO: Biological Process | Cognition                                    | 0.041                 | 2          | 327                | 46.48           | <i>EP300 MAP1A</i>     |
| Schizophrenia - Reticulocyte count                   | GO: Cellular Component | Nuclear speck                                | 0.043                 | 2          | 481                | 18.96           | <i>GATAD2A ARL6IP4</i> |
| Schizophrenia - Monocyte percentage of white cells   | GO: Cellular Component | Chromosome                                   | 0.044                 | 2          | 1918               | 7.92            | <i>EP300 GATAD2A</i>   |
| Multiple sclerosis - Eosinophil count                | GO: Cellular Component | Integral component of plasma membrane        | 0.045                 | 3          | 1881               | 6.06            | <i>CD5 FCRL2 FCRL3</i> |
| Multiple sclerosis - Eosinophil count                | GO: Cellular Component | Intrinsic component of plasma membrane       | 0.045                 | 3          | 1965               | 5.80            | <i>CD5 FCRL2 FCRL3</i> |

**Table S51. Drug targets identified for shared candidate genes (listed in Tables S36-37) underlying PDW - PD and PCT - stroke, respectively, related to Figure 4 and STAR Methods.**

| Trait Pair   | Gene          | Drug                        | Sources*                                            |
|--------------|---------------|-----------------------------|-----------------------------------------------------|
| PDW - PD     | <i>CTNNB1</i> | TEMSIROLIMUS                | JAX-CKB                                             |
| PDW - PD     | <i>CTNNB1</i> | CYCLOPHOSPHAMIDE            | PharmGKB                                            |
| PDW - PD     | <i>CTNNB1</i> | LENALIDOMIDE                | PharmGKB                                            |
| PDW - PD     | <i>CTNNB1</i> | LETROZOLE                   | CGI                                                 |
| PDW - PD     | <i>CTNNB1</i> | EVEROLIMUS                  | CGI                                                 |
| PDW - PD     | <i>CTNNB1</i> | EOSIN Y                     | DTC                                                 |
| PDW - PD     | <i>CTNNB1</i> | THALIDOMIDE                 | PharmGKB                                            |
| PDW - PD     | <i>CTNNB1</i> | VANTICTUMAB                 | JAX-CKB                                             |
| PDW - PD     | <i>CTNNB1</i> | CELECOXIB                   | PharmGKB                                            |
| PDW - PD     | <i>CTNNB1</i> | CHEMBL410484                | DTC                                                 |
| PDW - PD     | <i>CTNNB1</i> | DEXAMETHASONE               | PharmGKB                                            |
| PDW - PD     | <i>CTNNB1</i> | IMATINIB                    | JAX-CKB                                             |
| PDW - PD     | <i>CTNNB1</i> | FLUORESCHEIN SODIUM         | DTC                                                 |
| PDW - PD     | <i>CTNNB1</i> | DITHIAZANINE IODIDE         | DTC                                                 |
| PDW - PD     | <i>CTNNB1</i> | CHEMBL2172378               | DTC                                                 |
| PDW - PD     | <i>CTNNB1</i> | TRICIRIBINE                 | JAX-CKB                                             |
| PDW - PD     | <i>CTNNB1</i> | CHEMBL533293                | DTC                                                 |
| PDW - PD     | <i>CTNNB1</i> | TRAMETINIB                  | JAX-CKB                                             |
| PDW - PD     | <i>CTNNB1</i> | CHEMBL91638                 | DTC                                                 |
| PDW - PD     | <i>FXR2</i>   | METHYLPHENIDATE             | PharmGKB                                            |
| PDW - PD     | <i>GGCX</i>   | PHYTONADIONE                | TdgClinicalTrial TEND TTD                           |
| PDW - PD     | <i>GGCX</i>   | ANISINDIONE                 | TdgClinicalTrial TEND GuideToPharmacology           |
| PDW - PD     | <i>GGCX</i>   | MENADIONE                   | TdgClinicalTrial TEND                               |
| PDW - PD     | <i>GGCX</i>   | ACENOCOUMAROL               | PharmGKB                                            |
| PCT - Stroke | <i>KCNK5</i>  | QUINIDINE                   | GuideToPharmacology                                 |
| PCT - Stroke | <i>KCNK5</i>  | HALOTHANE                   | GuideToPharmacology                                 |
| PDW - PD     | <i>MAP3K5</i> | HYDROXYUREA                 | PharmGKB                                            |
| PDW - PD     | <i>MAP3K5</i> | SELONSERTIB                 | ChemblInteractions GuideToPharmacology TTD          |
| PDW - PD     | <i>PRKD1</i>  | QUERCETIN                   | MyCancerGenome                                      |
| PDW - PD     | <i>PRKD1</i>  | GSK-690693                  | ChemblInteractions                                  |
| PDW - PD     | <i>PRKD1</i>  | MIDOSTAURIN                 | ChemblInteractions                                  |
| PDW - PD     | <i>PRKD1</i>  | UCN-01                      | ChemblInteractions                                  |
| PDW - PD     | <i>PRKD1</i>  | SOTRASTAUIN                 | ChemblInteractions                                  |
| PDW - PD     | <i>PRKD1</i>  | CEP-2563                    | ChemblInteractions                                  |
| PDW - PD     | <i>PRKD1</i>  | BRYOSTATIN                  | TdgClinicalTrial                                    |
| PDW - PD     | <i>PRKD1</i>  | VASOPRESSIN                 | NCI                                                 |
| PDW - PD     | <i>PRKD1</i>  | RESVERATROL                 | NCI                                                 |
| PDW - PD     | <i>PSMB10</i> | BORTEZOMIB                  | DTC MyCancerGenome ChemblInteractions               |
| PDW - PD     | <i>PSMB10</i> | OPROZOMIB                   | ChemblInteractions                                  |
| PDW - PD     | <i>PSMB10</i> | IXAZOMIB CITRATE            | ChemblInteractions                                  |
| PDW - PD     | <i>PSMB10</i> | CARFILZOMIB                 | DTC MyCancerGenome ChemblInteractions               |
| PDW - PD     | <i>PSMB10</i> | MARIZOMIB                   | ChemblInteractions                                  |
| PDW - PD     | <i>PTK2</i>   | PF-00562271                 | TALC DTC ChemblInteractions GuideToPharmacology TTD |
| PDW - PD     | <i>PTK2</i>   | GSK-2256098                 | ChemblInteractions TTD                              |
| PDW - PD     | <i>PTK2</i>   | VS-4718                     | ChemblInteractions GuideToPharmacology TTD          |
| PDW - PD     | <i>PTK2</i>   | CEP-37440                   | ChemblInteractions GuideToPharmacology TTD          |
| PDW - PD     | <i>PTK2</i>   | ENMD-2076                   | TdgClinicalTrial GuideToPharmacology                |
| PDW - PD     | <i>PTK2</i>   | DEFACTINIB                  | TdgClinicalTrial ChemblInteractions                 |
| PDW - PD     | <i>PTK2</i>   | HESPERADIN                  | DTC                                                 |
| PDW - PD     | <i>PTK2</i>   | BI-853520                   | ChemblInteractions TTD                              |
| PDW - PD     | <i>PTK2</i>   | MASITINIB                   | MyCancerGenome                                      |
| PDW - PD     | <i>PTK2</i>   | SNS-314                     | DTC                                                 |
| PDW - PD     | <i>PTK2</i>   | CHEMBL456559                | DTC                                                 |
| PDW - PD     | <i>PTK2</i>   | LINIFANIB                   | DTC                                                 |
| PDW - PD     | <i>PTK2</i>   | GW843682X                   | DTC                                                 |
| PDW - PD     | <i>PTK2</i>   | CHEMBL2333445               | DTC                                                 |
| PDW - PD     | <i>PTK2</i>   | PD-0166285                  | DTC                                                 |
| PDW - PD     | <i>PTK2</i>   | ALISERTIB                   | DTC                                                 |
| PDW - PD     | <i>PTK2</i>   | RG-1530                     | DTC                                                 |
| PDW - PD     | <i>PTK2</i>   | DEFACTINIB<br>HYDROCHLORIDE | TTD                                                 |
| PDW - PD     | <i>PTK2</i>   | ENTRECTINIB                 | DTC                                                 |
| PDW - PD     | <i>PTK2</i>   | PAZOPANIB                   | DTC                                                 |
| PDW - PD     | <i>PTK2</i>   | ADAVOSERTIB                 | DTC                                                 |
| PDW - PD     | <i>PTK2</i>   | ILORASERTIB                 | DTC                                                 |
| PDW - PD     | <i>PTK2</i>   | R-406                       | DTC                                                 |

|              |               |                               |                                                        |
|--------------|---------------|-------------------------------|--------------------------------------------------------|
| PDW - PD     | <i>PTK2</i>   | CHEMBL1997335                 | DTC                                                    |
| PDW - PD     | <i>PTK2</i>   | CHLORPYRAMIN<br>HYDROCHLORIDE | DTC                                                    |
| PDW - PD     | <i>PTK2</i>   | MLN-8054                      | DTC                                                    |
| PCT - Stroke | <i>PXN</i>    | CHEMBL456559                  | DTC                                                    |
| PCT - Stroke | <i>PXN</i>    | LOVASTATIN                    | NCI                                                    |
| PDW - PD     | <i>RHD</i>    | ROZROLIMUPAB                  | ChemblInteractions                                     |
| PDW - PD     | <i>RHD</i>    | ROLEDUMAB                     | ChemblInteractions TTD                                 |
| PDW - PD     | <i>RHD</i>    | ATOROLIMUMAB                  | ChemblInteractions                                     |
| PDW - PD     | <i>SEN3</i>   | METHYLPHENIDATE               | PharmGKB                                               |
| PDW - PD     | <i>SREBF1</i> | INSULIN                       | NCI                                                    |
| PDW - PD     | <i>SREBF1</i> | FLUVASTATIN                   | PharmGKB                                               |
| PDW - PD     | <i>SYK</i>    | CERDULATINIB                  | ChemblInteractions GuideToPharmacology TTD             |
| PDW - PD     | <i>SYK</i>    | APITOLISIB                    | GuideToPharmacology                                    |
| PDW - PD     | <i>SYK</i>    | FOSTAMATINIB                  | MyCancerGenome TdgClinicalTrial ChemblInteractions TTD |
| PDW - PD     | <i>SYK</i>    | R-343                         | ChemblInteractions                                     |
| PDW - PD     | <i>SYK</i>    | ENTOSPLETINIB                 | ChemblInteractions GuideToPharmacology TTD             |
| PDW - PD     | <i>SYK</i>    | R-112                         | ChemblInteractions                                     |
| PDW - PD     | <i>SYK</i>    | R-406                         | DTC ChemblInteractions                                 |
| PDW - PD     | <i>SYK</i>    | LANRAPLENIB                   | GuideToPharmacology                                    |
| PDW - PD     | <i>SYK</i>    | PRT-2607                      | ChemblInteractions GuideToPharmacology TTD             |
| PDW - PD     | <i>SYK</i>    | HMPL-523                      | ChemblInteractions                                     |
| PDW - PD     | <i>SYK</i>    | R-348                         | ChemblInteractions                                     |
| PDW - PD     | <i>SYK</i>    | TAK-659                       | ChemblInteractions TTD                                 |
| PDW - PD     | <i>SYK</i>    | R-333                         | ChemblInteractions                                     |
| PDW - PD     | <i>SYK</i>    | ENTRECTINIB                   | DTC                                                    |
| PDW - PD     | <i>SYK</i>    | CEDIRANIB                     | DTC                                                    |
| PDW - PD     | <i>SYK</i>    | ERLOTINIB                     | DTC                                                    |
| PDW - PD     | <i>SYK</i>    | SP-600125                     | DTC                                                    |
| PDW - PD     | <i>SYK</i>    | CHEMBL535331                  | DTC                                                    |
| PDW - PD     | <i>SYK</i>    | PD-0166285                    | DTC                                                    |
| PDW - PD     | <i>SYK</i>    | RG-1530                       | DTC                                                    |
| PDW - PD     | <i>SYK</i>    | ILORASERTIB                   | DTC                                                    |
| PDW - PD     | <i>SYK</i>    | ADAVOSERTIB                   | DTC                                                    |
| PDW - PD     | <i>SYK</i>    | IMATINIB MESYLATE             | TTD                                                    |
| PDW - PD     | <i>SYK</i>    | GW441756X                     | DTC                                                    |
| PDW - PD     | <i>SYK</i>    | TAE-684                       | DTC                                                    |
| PDW - PD     | <i>SYK</i>    | PACLITAXEL                    | CIViC                                                  |
| PDW - PD     | <i>SYK</i>    | CYC-116                       | DTC                                                    |
| PDW - PD     | <i>SYK</i>    | CENISERTIB                    | DTC                                                    |
| PDW - PD     | <i>SYK</i>    | DASATINIB                     | DTC                                                    |
| PDW - PD     | <i>SYK</i>    | CHEMBL379975                  | DTC                                                    |

\*Sources are based on the drug-gene interaction database (DGIdb; <https://www.dgldb.org/>).

PCT: plateletcrit. PDW: platelet distribution width. PD: Parkinson's disease.

## Supplemental Data

### **Data S1. Phenotypic correlations for BCT-NPD trait pairs with putative causal relationships, related to STAR Methods.**

Using individual-level data from the UK Biobank (UKB) cohort, we estimated phenotypic correlations for the three blood cell trait (BCT)-neurological and psychiatric disorder (NPD) pairs found to have a putative or suggestive causal relationship on the basis of Mendelian randomisation (MR): plateletcrit (“PCT”) and stroke, platelet distribution width (“PDW”) and Parkinson's disease (PD), and lymphocyte count (LYMPH#) and multiple sclerosis (MS). After restricting to unrelated Europeans (genetic relatedness  $< 0.05$ ) and removing individuals with missing data on sex and age at recruitment, nearly 348K individuals remained. Individuals were coded with information on PCT (UKB field ID: 30090), PDW (UKB field ID: 30110), LYMPH# (UKB field ID: 30120), stroke-related variables (UKB field ID: 42007 [hospital admission, exclude self-report only], 42009 [hospital admission, exclude self-report only], 41270-I64 [10th revision of the International Statistical Classification of Diseases (ICD10)-based stroke status]), PD status (UKB field ID: 41270-G20 [ICD10-based PD status]), and MS status (UKB field ID: 41270-G35 [ICD10-based MS status]).

We defined stroke cases (hospital admission and ICD10-based stroke,  $n = 5,288$ , UKB field ID: 42007 + 42009 + 41270-I64), PD cases (ICD10-based PD,  $n = 1,323$ , UKB field ID: 41270-G20), and MS cases (ICD10-based MS,  $n = 1,238$ , UKB field ID: 41270-G35). For each diagnostic group (i.e., stroke, PD or MS cases, respectively), we randomly selected healthy controls from individuals without the respective diagnosis (i.e., non-stroke, non-PD or non-MS), matching by sex and age ( $\pm 2$  years). We then evaluated the phenotypic correlations ( $r_P$ ) for these three pairs of traits, using the full sample and lists of sub-samples at an assumed prevalence of 1% (for PD and MS), 2% (for PD and MS), 5% (for all three diseases) and 10% (for stroke only), respectively. We observed significant phenotypic correlations between PCT and stroke, regardless of the definition used to define the prevalence, with estimated  $r_P$  at around 0.01 ( $p < 0.05$ ; Table S28). We also observed marginally significant phenotypic correlations between PDW and PD ( $r_P \sim 0.01$ ,  $p < 0.07$ ; Table S28). Conversely, we failed to observe any evidence for a significant phenotypic correlation between LYMPH# and MS, potentially due to the modest number of MS cases in the UKB (Table S28).

**Data S2. Investigating the role of inflammatory response in mediating the causal relationship between platelet distribution width and Parkinson's disease, related to STAR Methods.**

Published studies<sup>2-6</sup> support a critical role for the inflammatory response on both PD and platelet hyperactivity. On the basis of these findings, we hypothesised that C-reactive protein (CRP, used as a 'proxy' of inflammatory response) might be relevant to the putative causal effect of PDW on PD.

We investigated the role of CRP using a conditional MR approach. First, we utilised multi-trait-based conditional & joint analysis (mtCOJO)<sup>7</sup> to condition genome-wide association study (GWAS) summary data of PDW and PD on the GWAS of CRP<sup>8</sup>, based on the in-house UKB genotype reference of unrelated Europeans. Here, we used summary data from the GWAS of CRP by Ligthart et al.<sup>8</sup>, which was generated from 204,402 individuals of European ancestry using fixed-effect inverse-variance-weighted meta-analysis. Second, we re-estimated the causal relationship between PD and PDW on the basis of the conditional GWAS summary statistics using CAUSE<sup>9</sup>. Notably, the results from these conditional CAUSE analyses were highly consistent with the original analyses, both with PDW as an exposure for PD (odds ratio [OR<sub>CAUSE</sub>] = 1.07, 95% confidence interval [CI] = 1.02-1.12,  $p_{OR} = 1.37 \times 10^{-3}$ ;  $p = 0.04$  for testing if the causal model is a better fit than the sharing model or null model) and PD as an exposure for PDW (OR<sub>CAUSE</sub> = 0.99, 95% CI = 0.98-1.00,  $p_{OR} = 0.06$ ;  $p = 0.27$ ) (Table S26). This suggests a limited contribution of the inflammatory response on the putative causality of PDW on risk of PD. This conclusion is also supported by the absence of support for a significant genome-wide genetic correlation (estimated by linkage disequilibrium score regression<sup>10</sup>) between CRP and PDW ( $r_g = 0.07$ , se = 0.06,  $p = 0.11$ ), or between CRP and PD ( $r_g = -0.06$ , se = 0.05,  $p = 0.10$ ).

## Supplemental References

1. Lloyd-Jones, L.R., Zeng, J., Sidorenko, J., Yengo, L., Moser, G., Kemper, K.E., Wang, H., Zheng, Z., Magi, R., Esko, T., et al. (2019). Improved polygenic prediction by Bayesian multiple regression on summary statistics. *Nat Commun* *10*, 5086. 10.1038/s41467-019-12653-0.
2. Park, S.M., Jung, H.Y., Kim, H.O., Rhim, H., Paik, S.R., Chung, K.C., Park, J.H., and Kim, J. (2002). Evidence that alpha-synuclein functions as a negative regulator of Ca(++)-dependent alpha-granule release from human platelets. *Blood* *100*, 2506-2514. 10.1182/blood.V100.7.2506.
3. Rawish, E., Nording, H., Munte, T., and Langer, H.F. (2020). Platelets as Mediators of Neuroinflammation and Thrombosis. *Front Immunol* *11*, 548631. 10.3389/fimmu.2020.548631.
4. Wang, Q., Liu, Y., and Zhou, J. (2015). Neuroinflammation in Parkinson's disease and its potential as therapeutic target. *Transl Neurodegener* *4*, 19. 10.1186/s40035-015-0042-0.
5. Koupenova, M., Clancy, L., Corkrey, H.A., and Freedman, J.E. (2018). Circulating Platelets as Mediators of Immunity, Inflammation, and Thrombosis. *Circ Res* *122*, 337-351. 10.1161/CIRCRESAHA.117.310795.
6. Morrell, C.N., Aggrey, A.A., Chapman, L.M., and Modjeski, K.L. (2014). Emerging roles for platelets as immune and inflammatory cells. *Blood* *123*, 2759-2767. 10.1182/blood-2013-11-462432.
7. Zhu, Z., Zheng, Z., Zhang, F., Wu, Y., Trzaskowski, M., Maier, R., Robinson, M.R., McGrath, J.J., Visscher, P.M., Wray, N.R., and Yang, J. (2018). Causal associations between risk factors and common diseases inferred from GWAS summary data. *Nat Commun* *9*, 224. 10.1038/s41467-017-02317-2.
8. Ligthart, S., Vaez, A., Vosa, U., Stathopoulou, M.G., de Vries, P.S., Prins, B.P., Van der Most, P.J., Tanaka, T., Naderi, E., Rose, L.M., et al. (2018). Genome Analyses of >200,000 Individuals Identify 58 Loci for Chronic Inflammation and Highlight Pathways that Link Inflammation and Complex Disorders. *Am J Hum Genet* *103*, 691-706. 10.1016/j.ajhg.2018.09.009.
9. Morrison, J., Knoblauch, N., Marcus, J.H., Stephens, M., and He, X. (2020). Mendelian randomization accounting for correlated and uncorrelated pleiotropic effects using genome-wide summary statistics. *Nat Genet* *52*, 740-747. 10.1038/s41588-020-0631-4.
10. Bulik-Sullivan, B.K., Loh, P.R., Finucane, H.K., Ripke, S., Yang, J., Schizophrenia Working Group of the Psychiatric Genomics, C., Patterson, N., Daly, M.J., Price, A.L., and Neale, B.M. (2015). LD Score regression distinguishes confounding from polygenicity in genome-wide association studies. *Nat Genet* *47*, 291-295. 10.1038/ng.3211.
